# Supplementary material for: A systematic survey of centrality measures for protein-protein interaction networks
Source: Springer Nature journal article supplement (doi:10.1186/s12918-018-0598-2), 2018-07-31

# “Coexpression”

## Degree Distribution

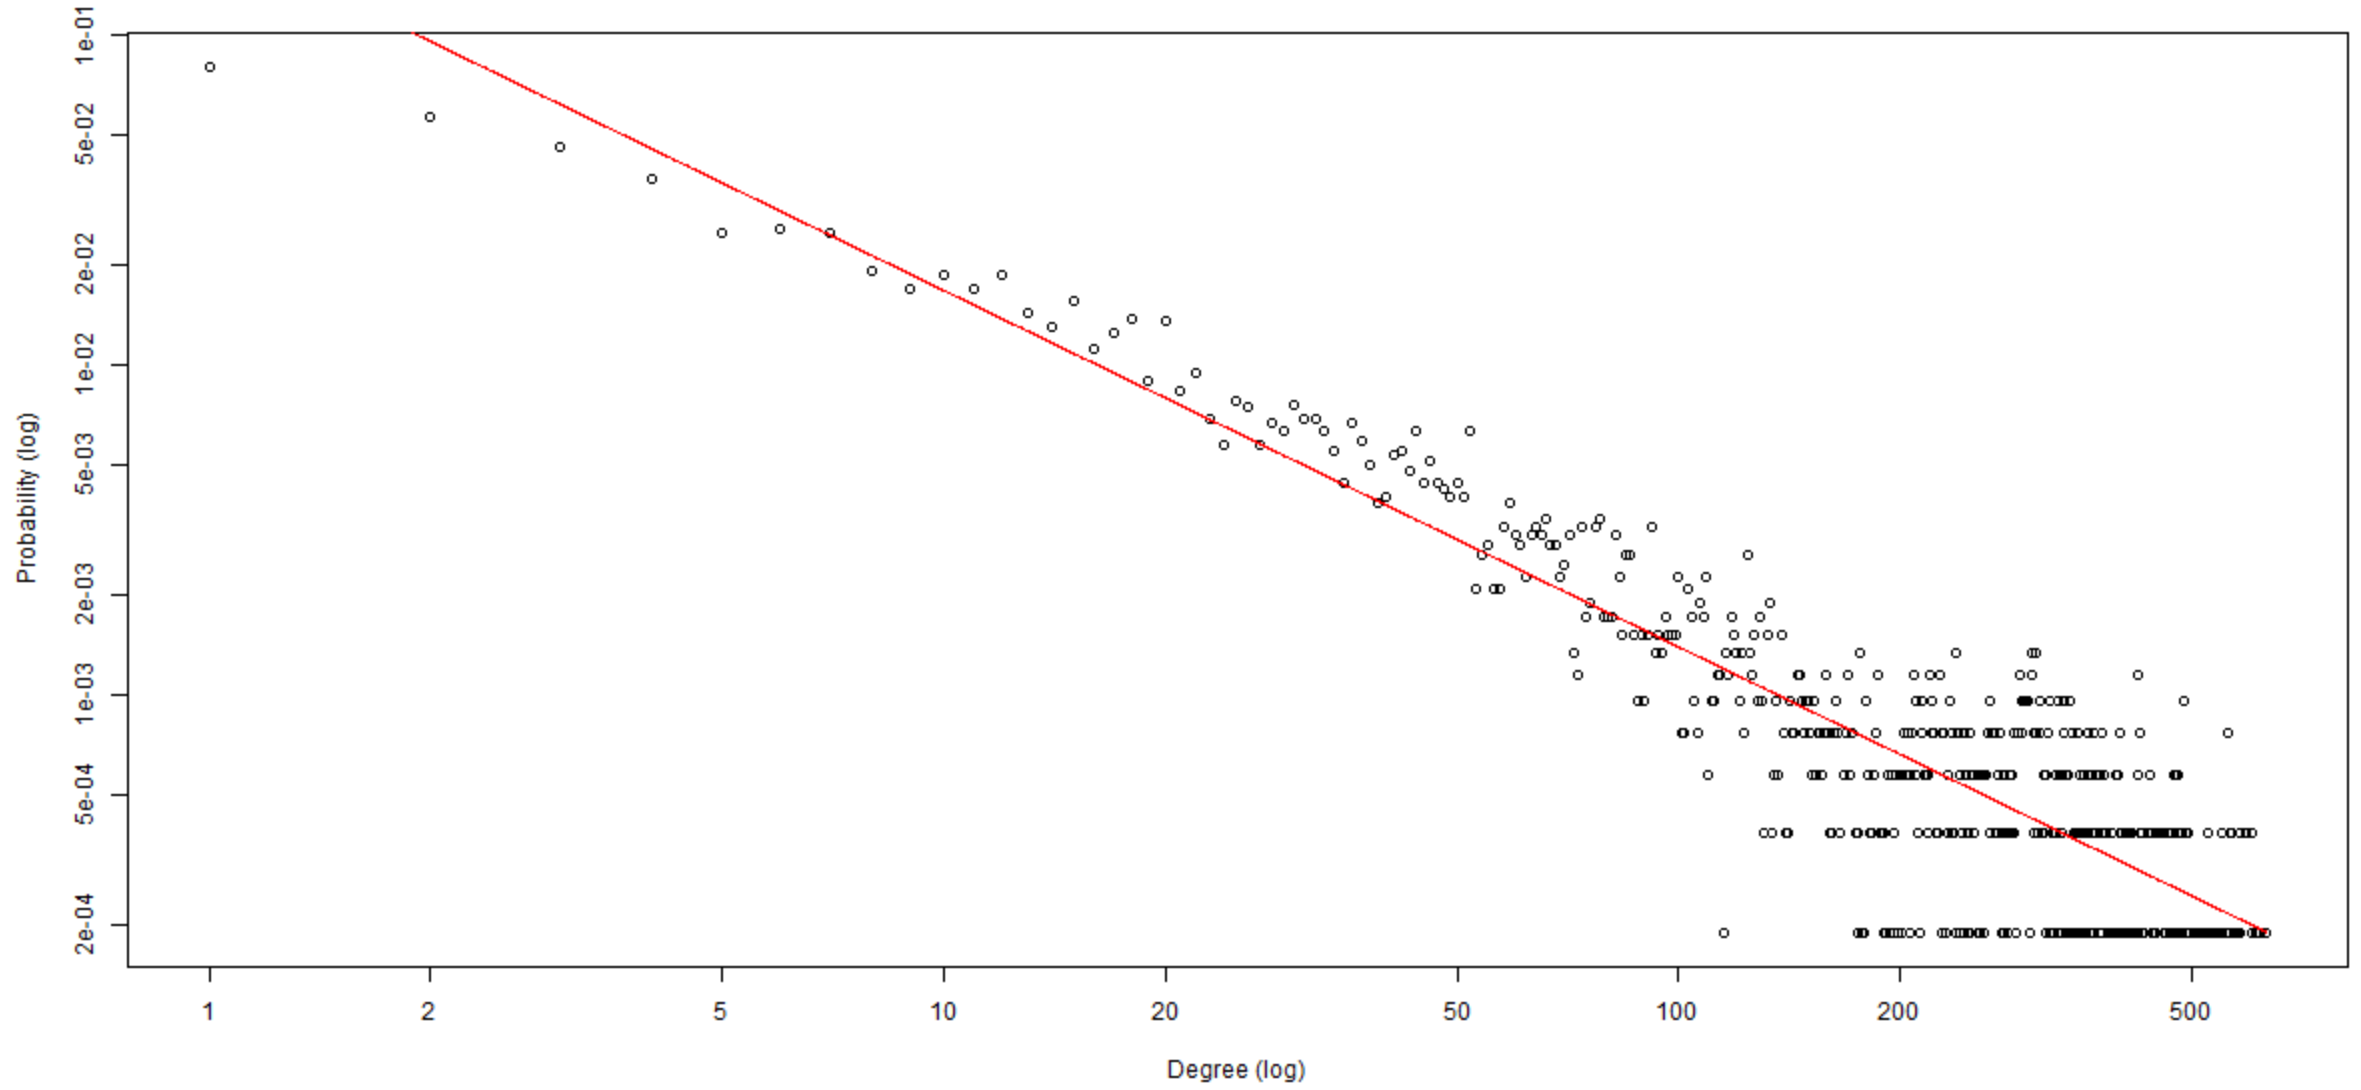

“Coexpression\_transferred”

**Degree Distribution**

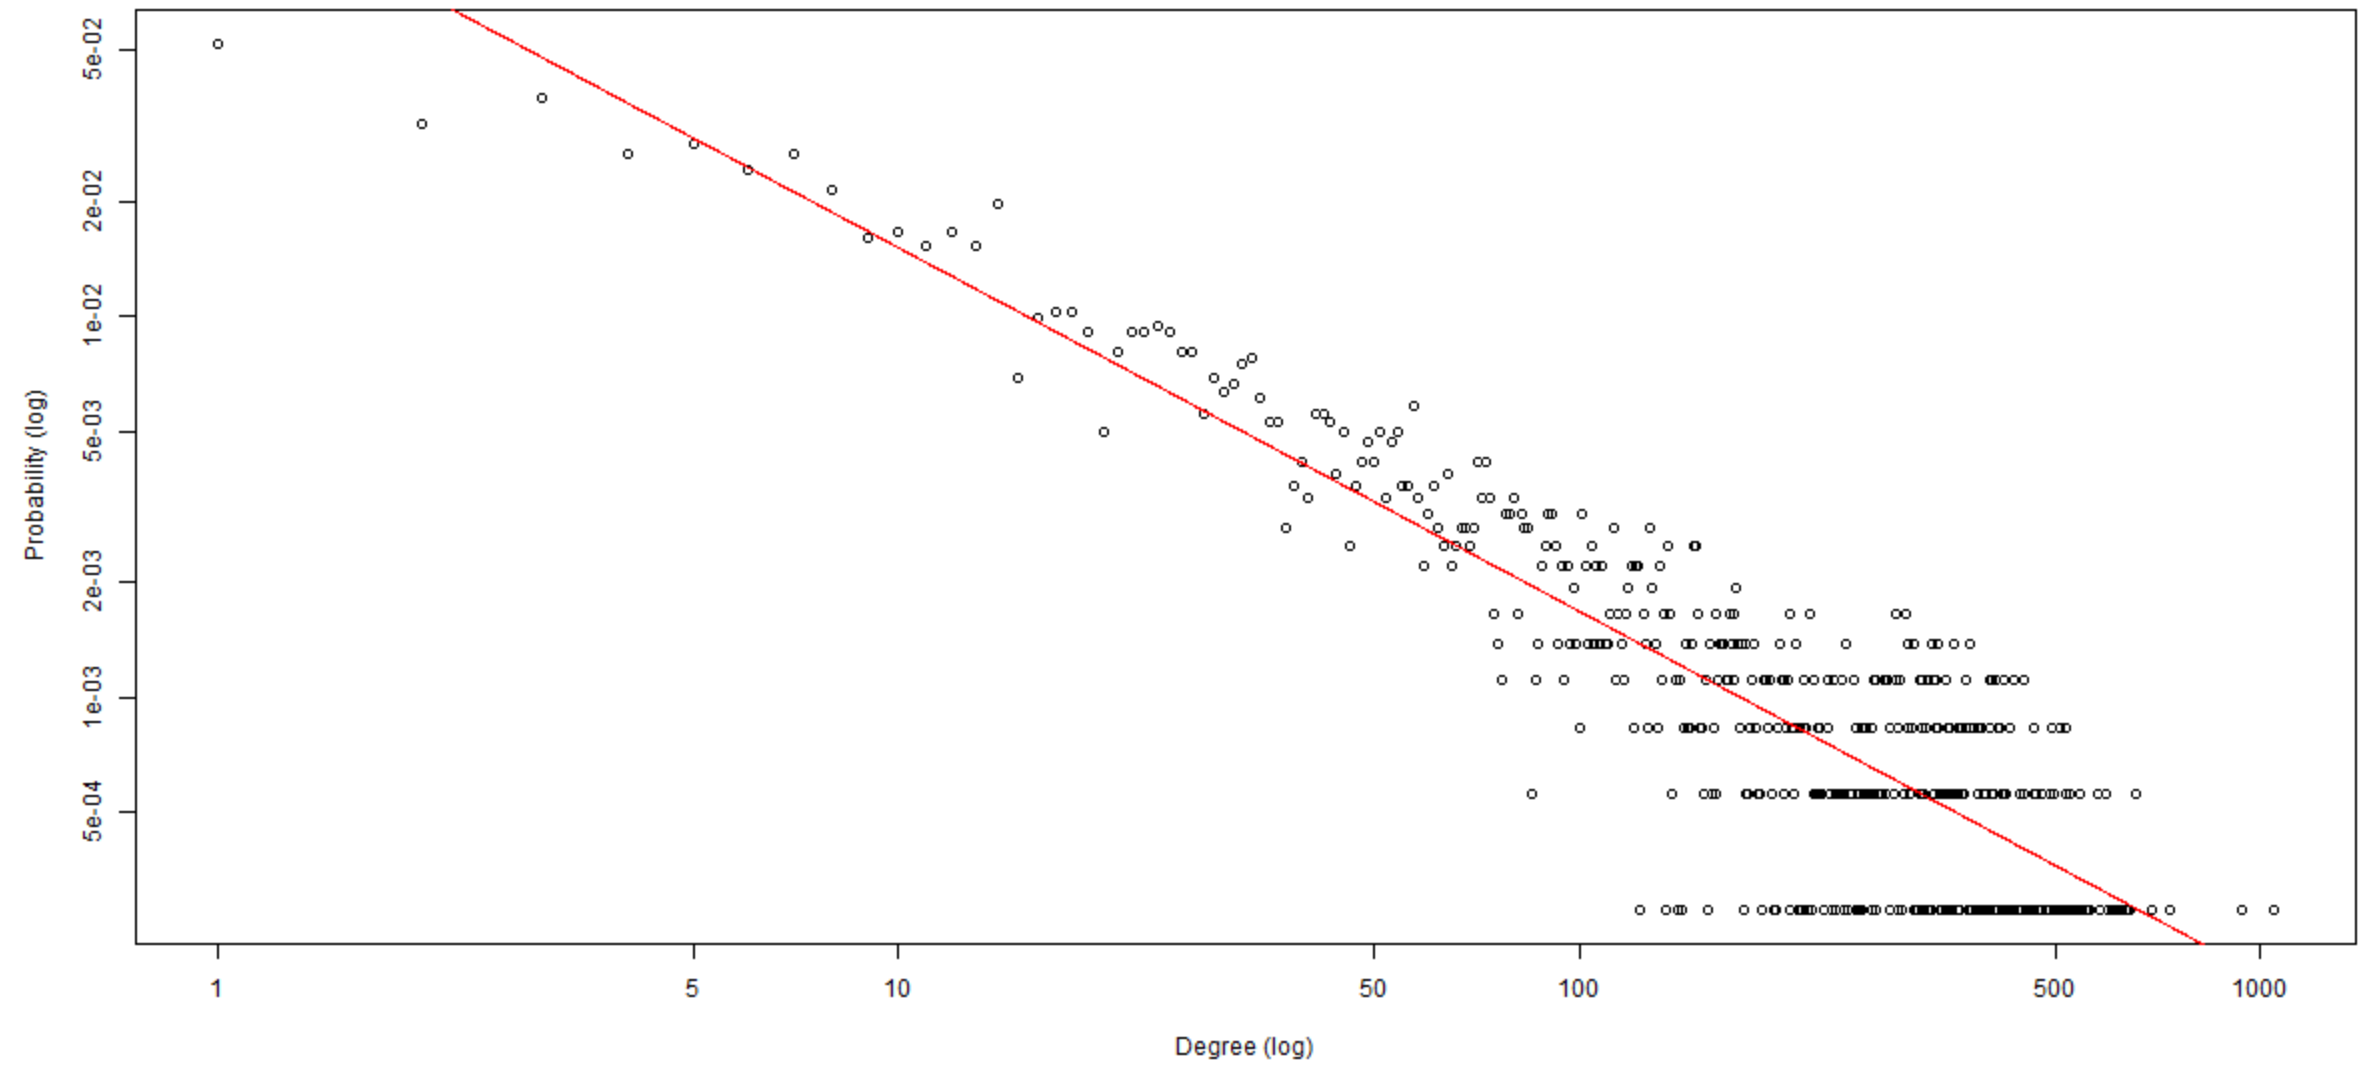

# “Cooccurence”

## Degree Distribution

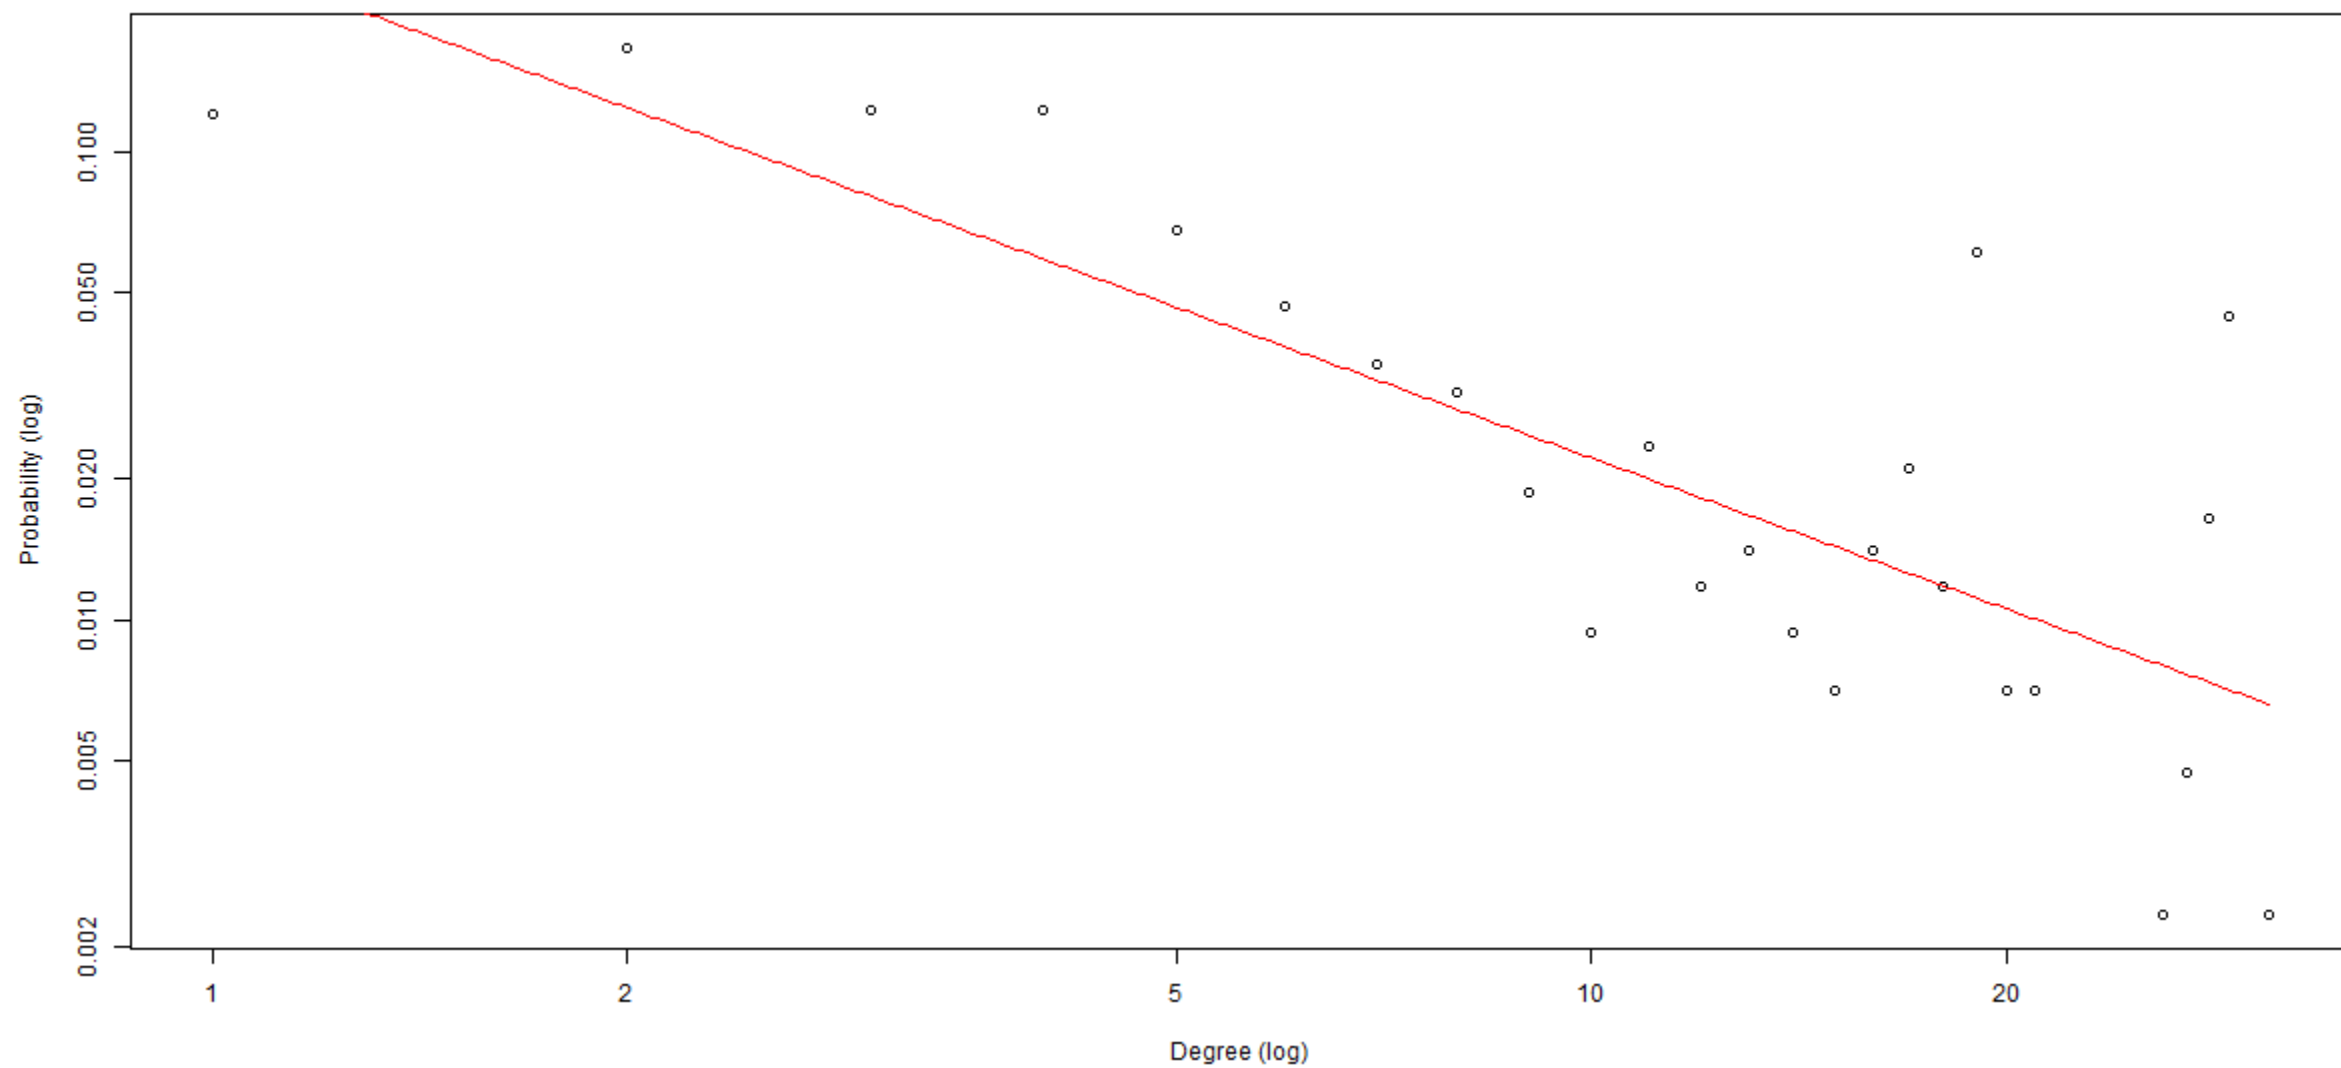

“Database”

**Degree Distribution**

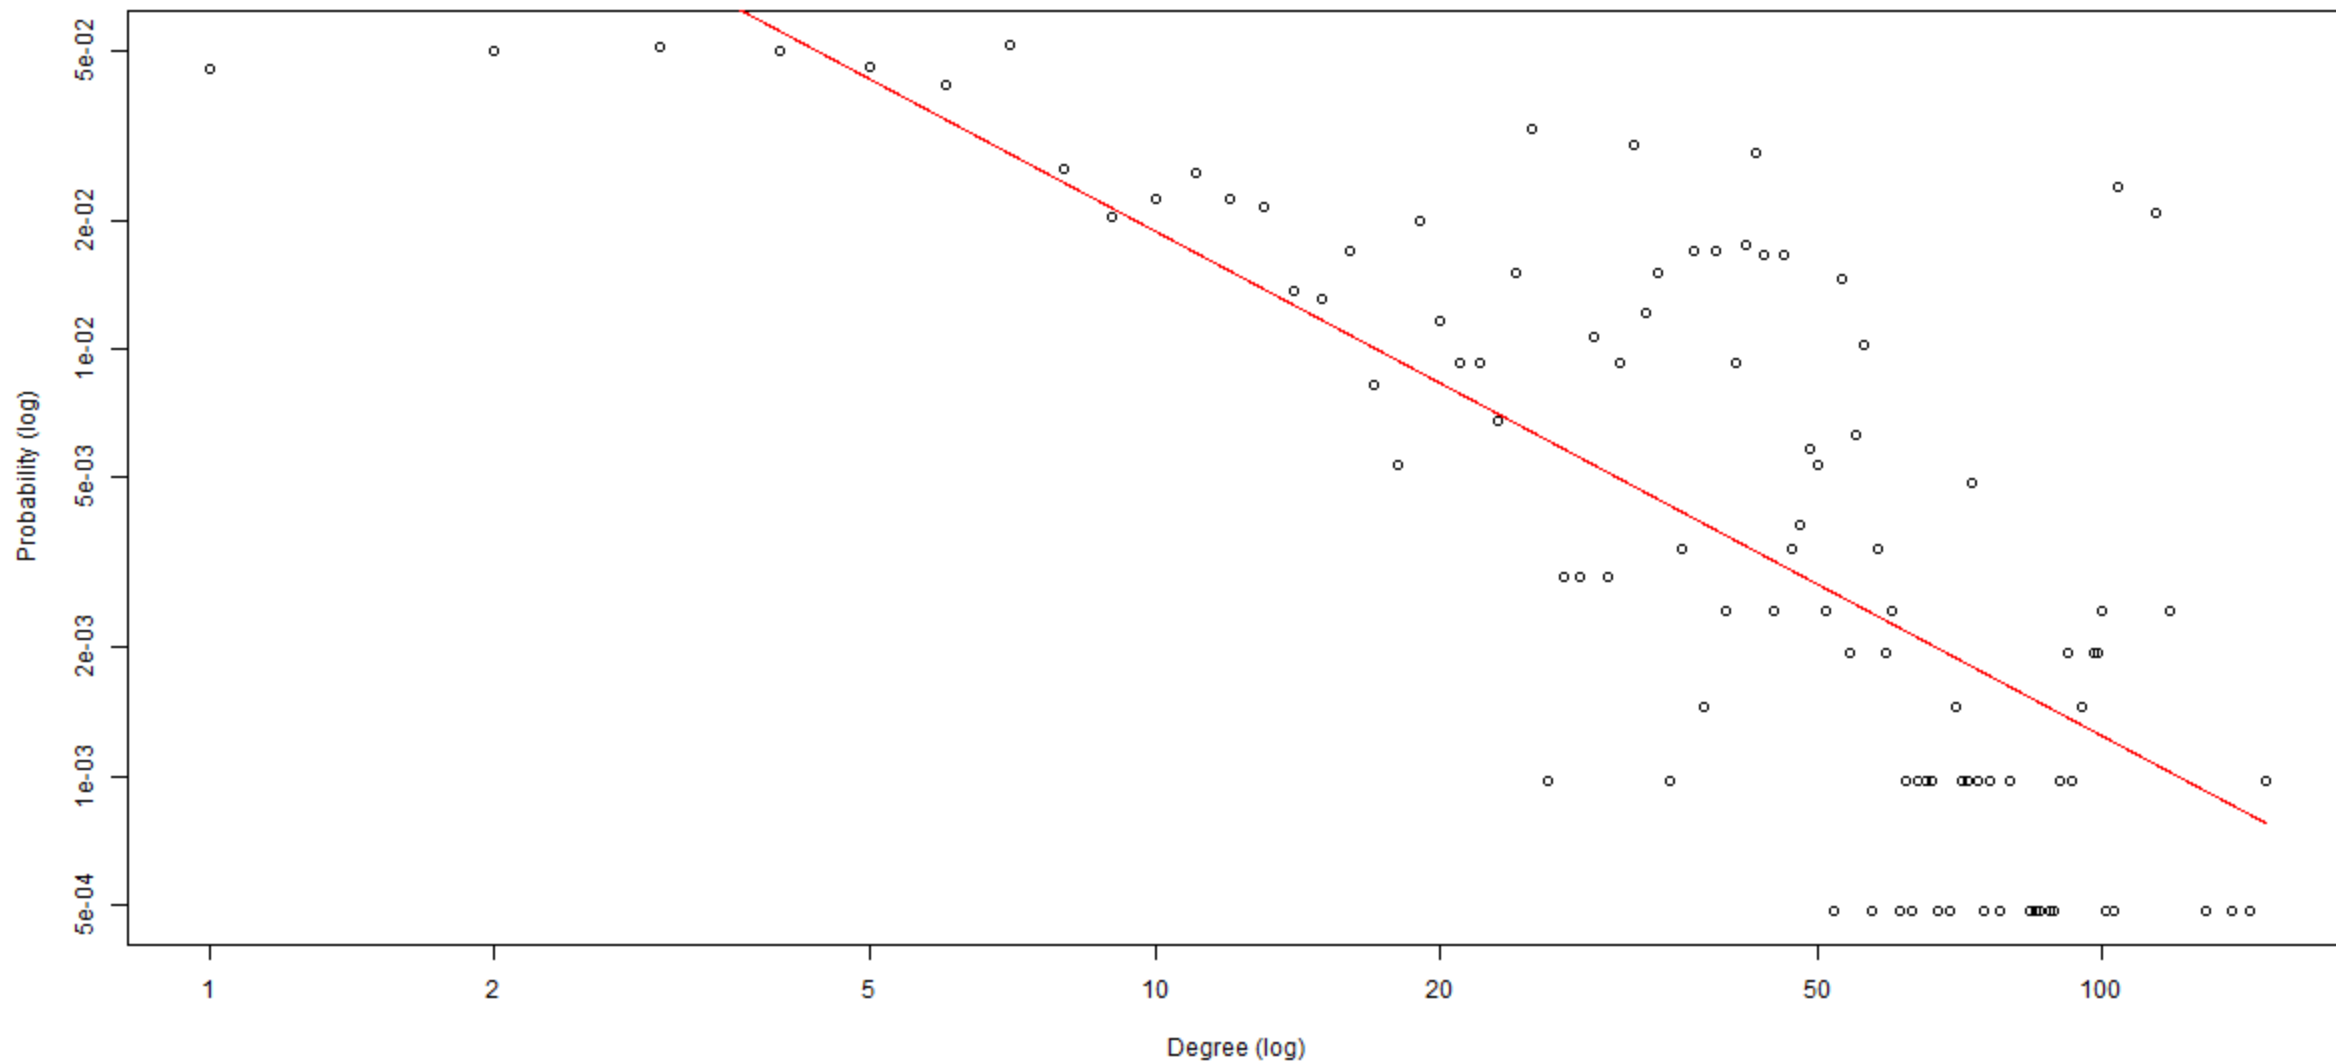

“Database\_transferred”

**Degree Distribution**

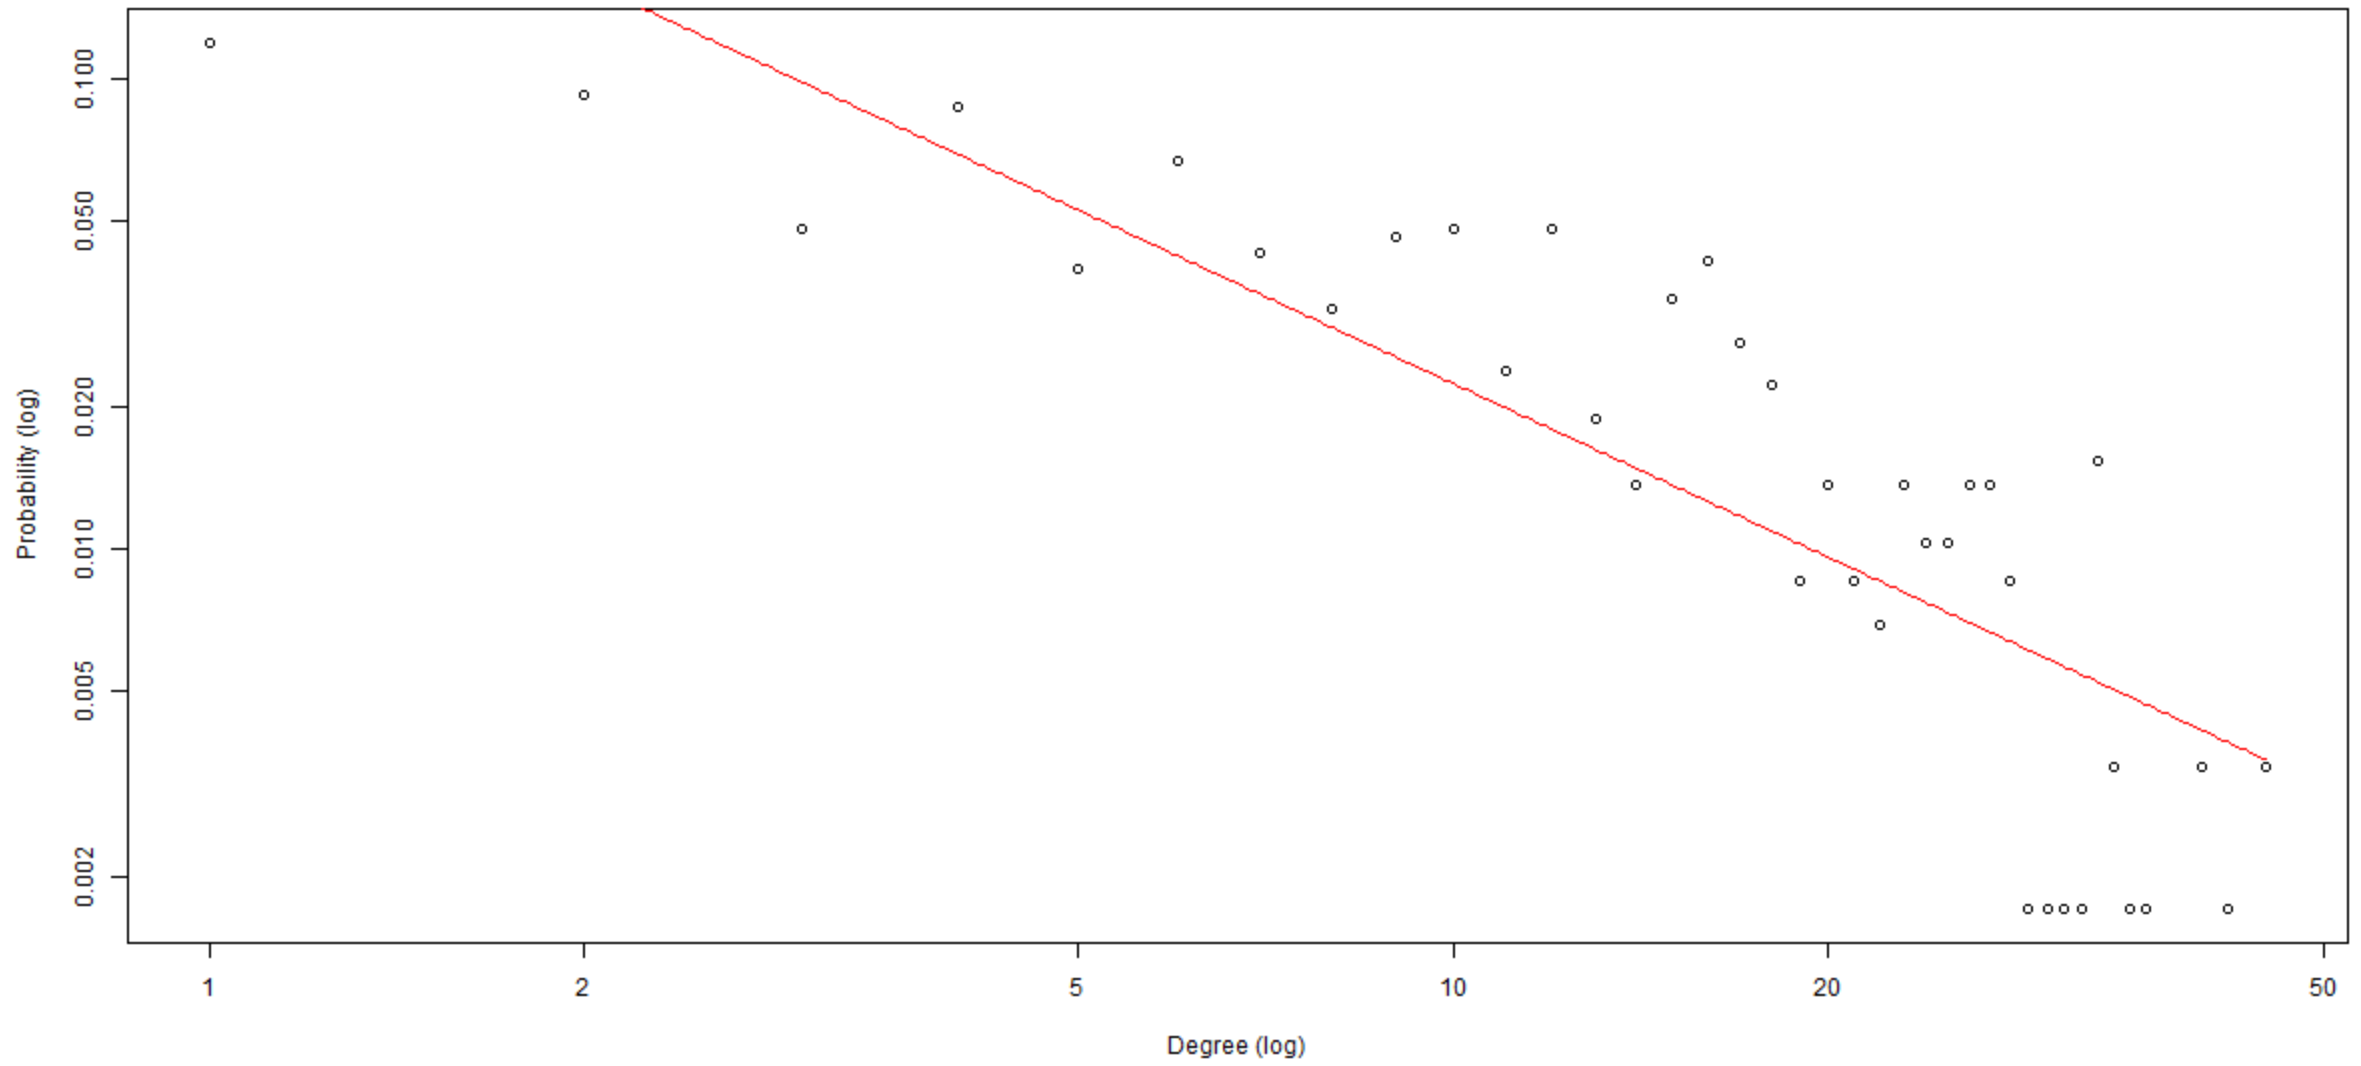

# "Experiments"

## Degree Distribution

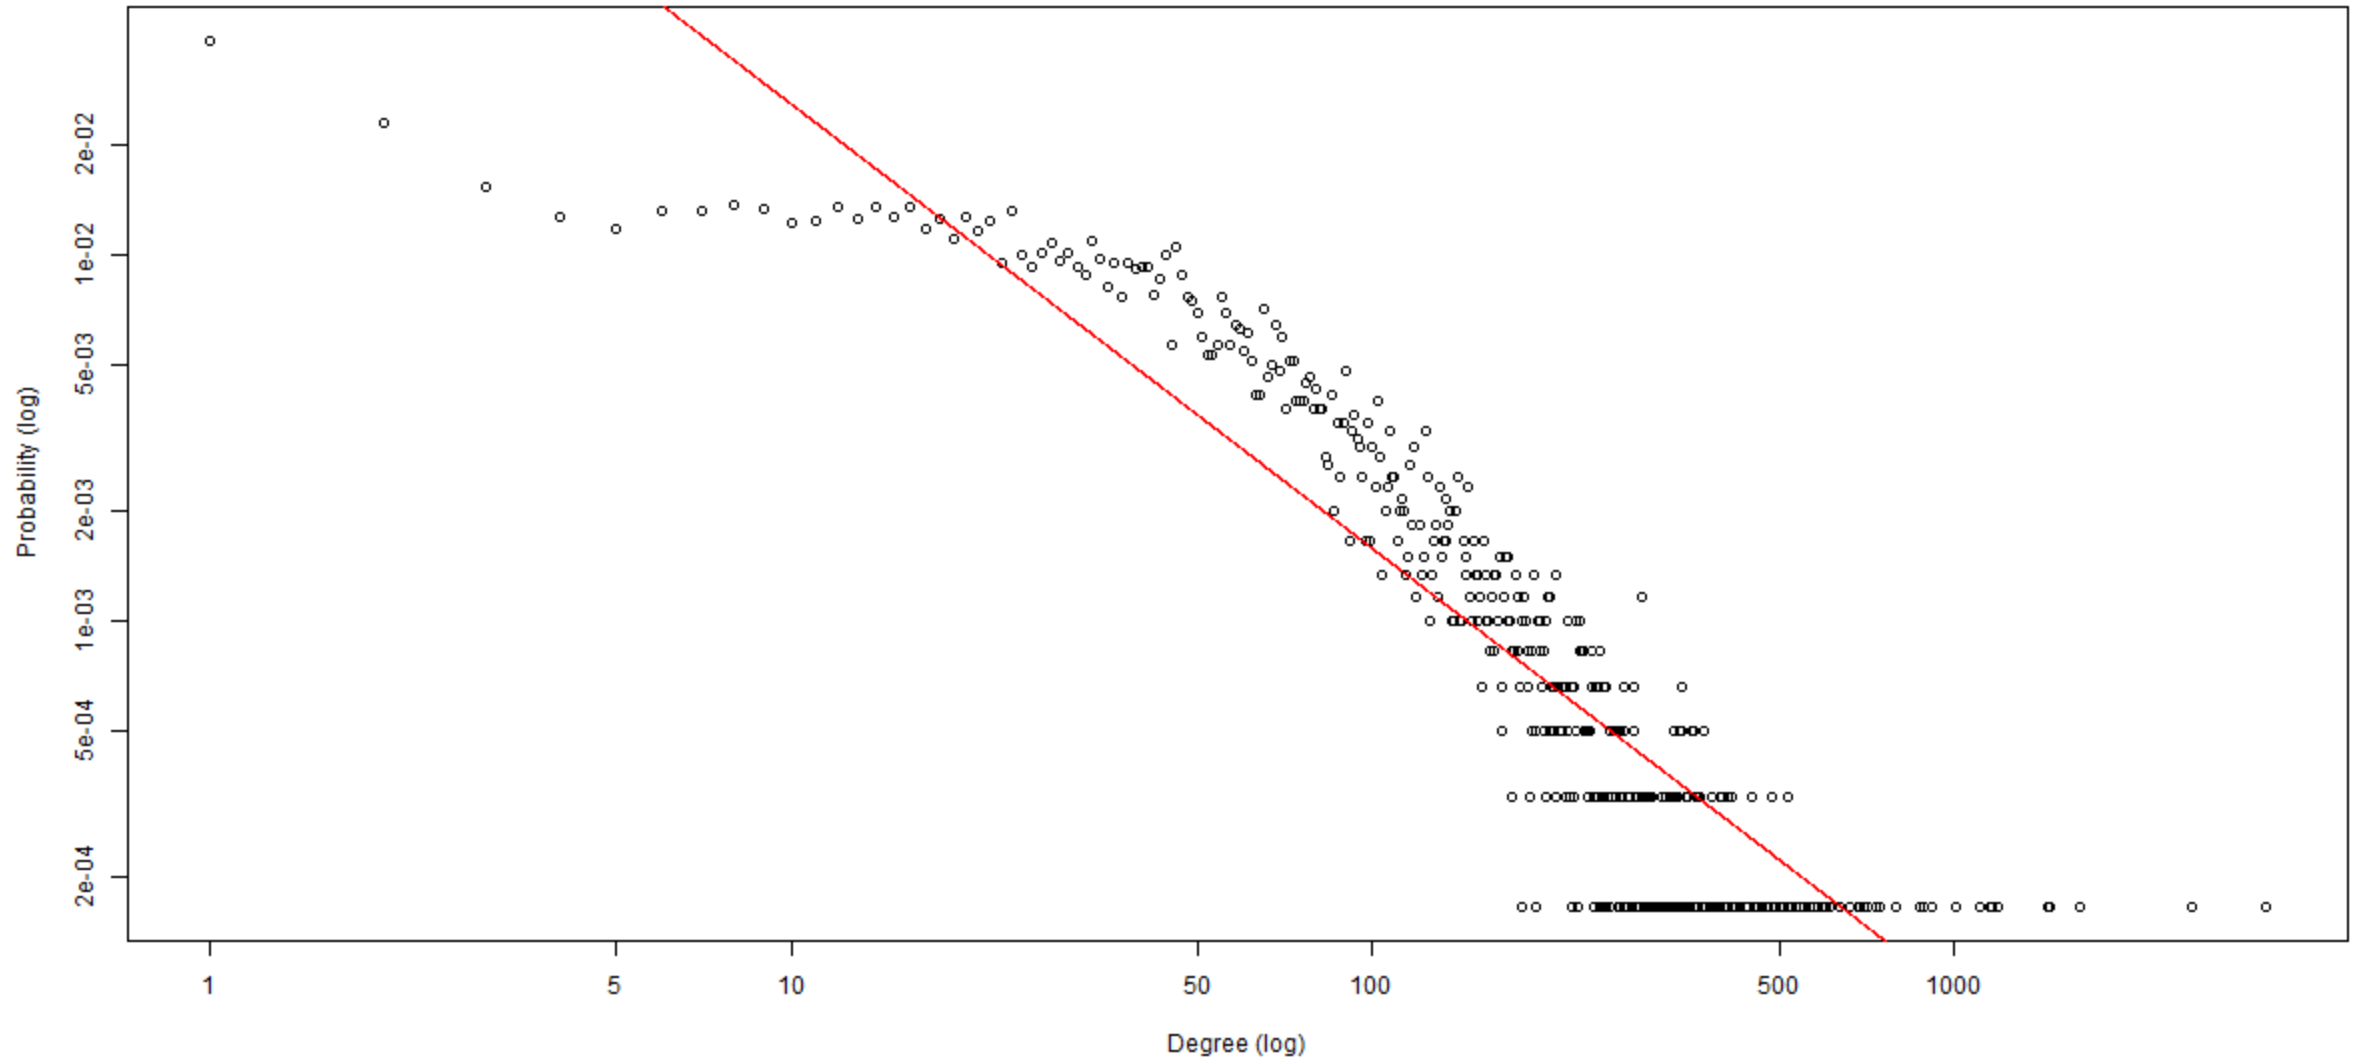

“Experiments\_transferred”

### Degree Distribution

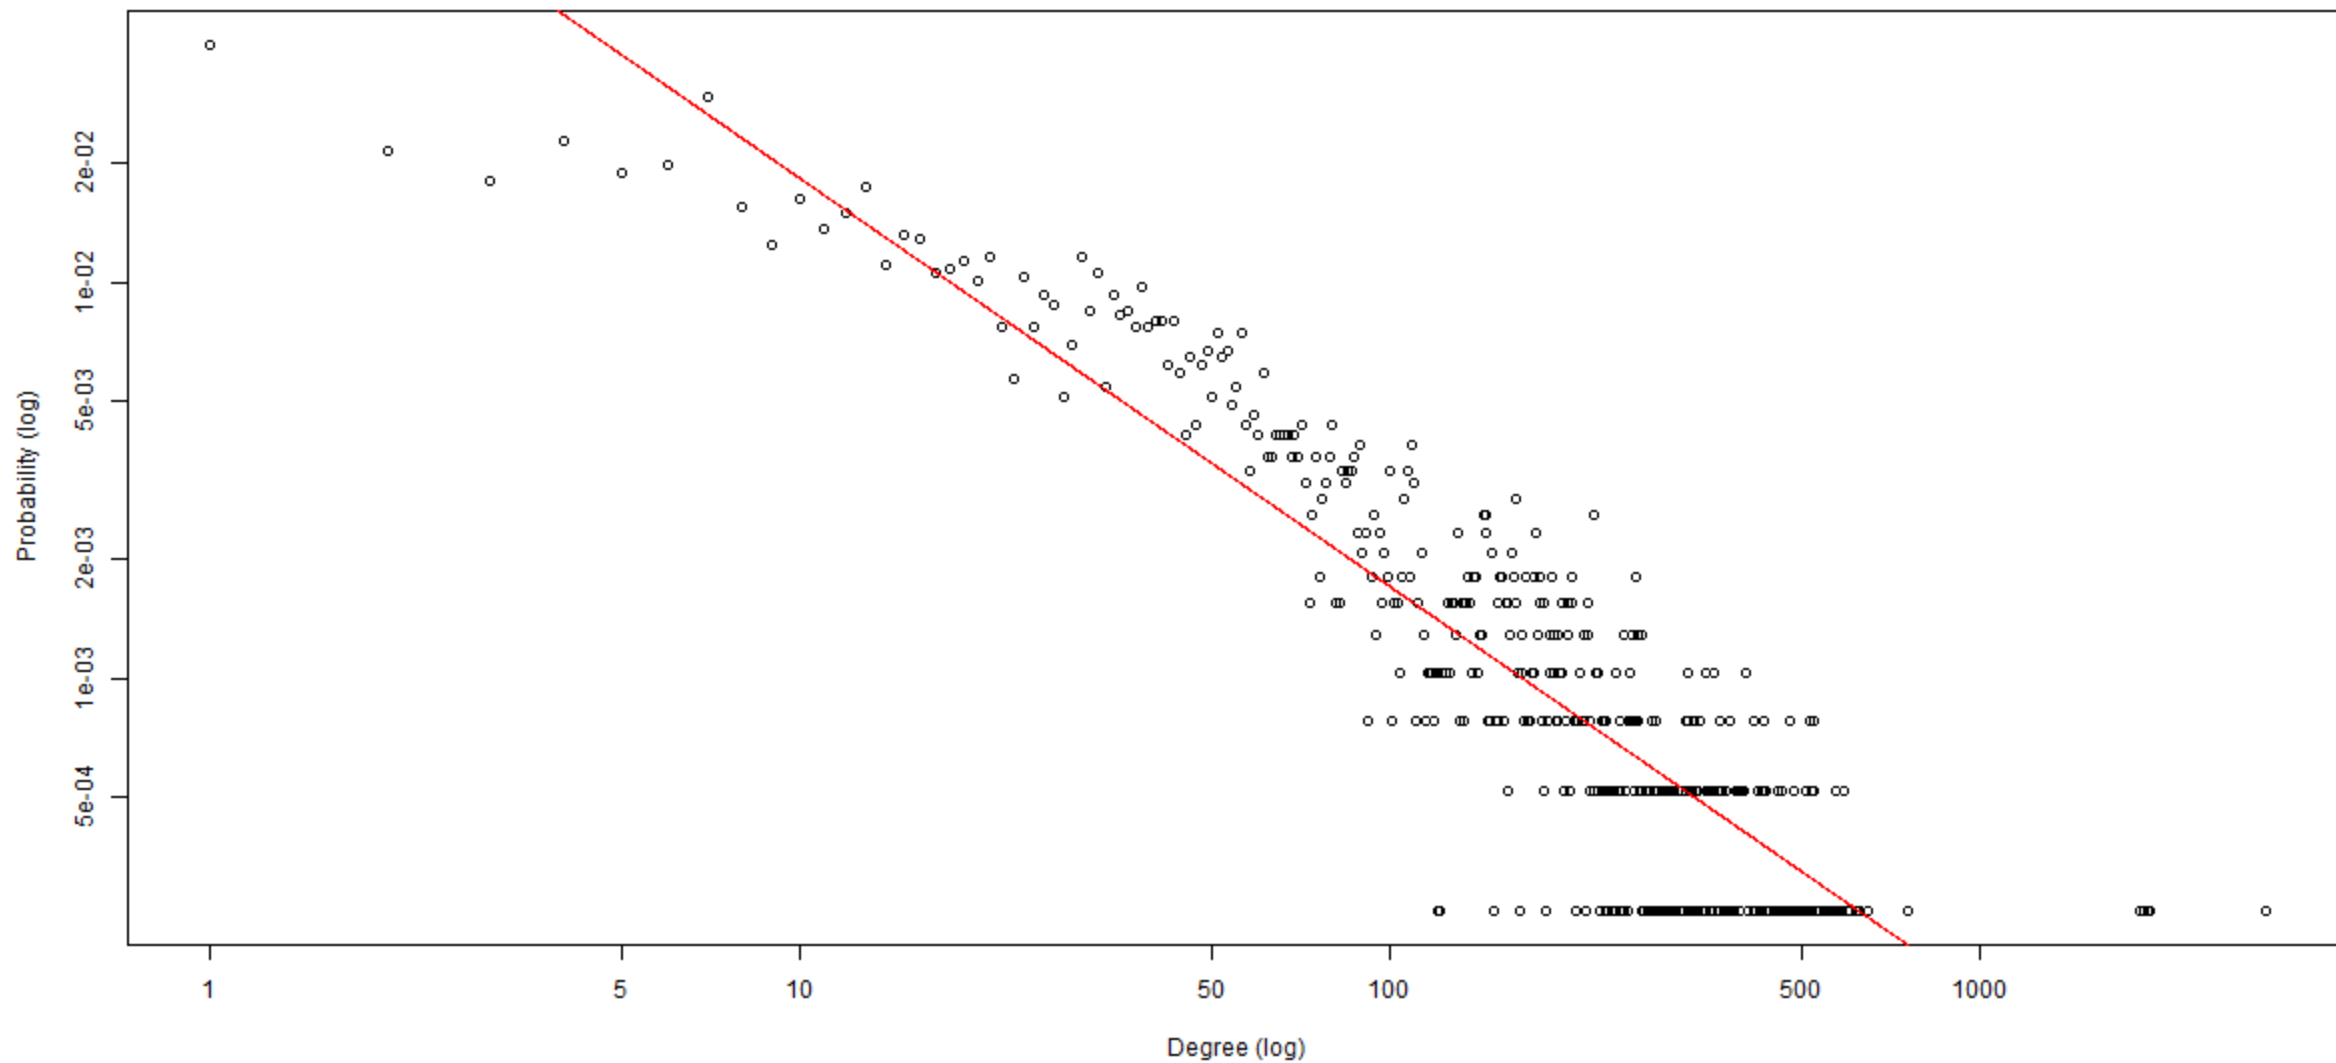

# "Textmining"

## Degree Distribution

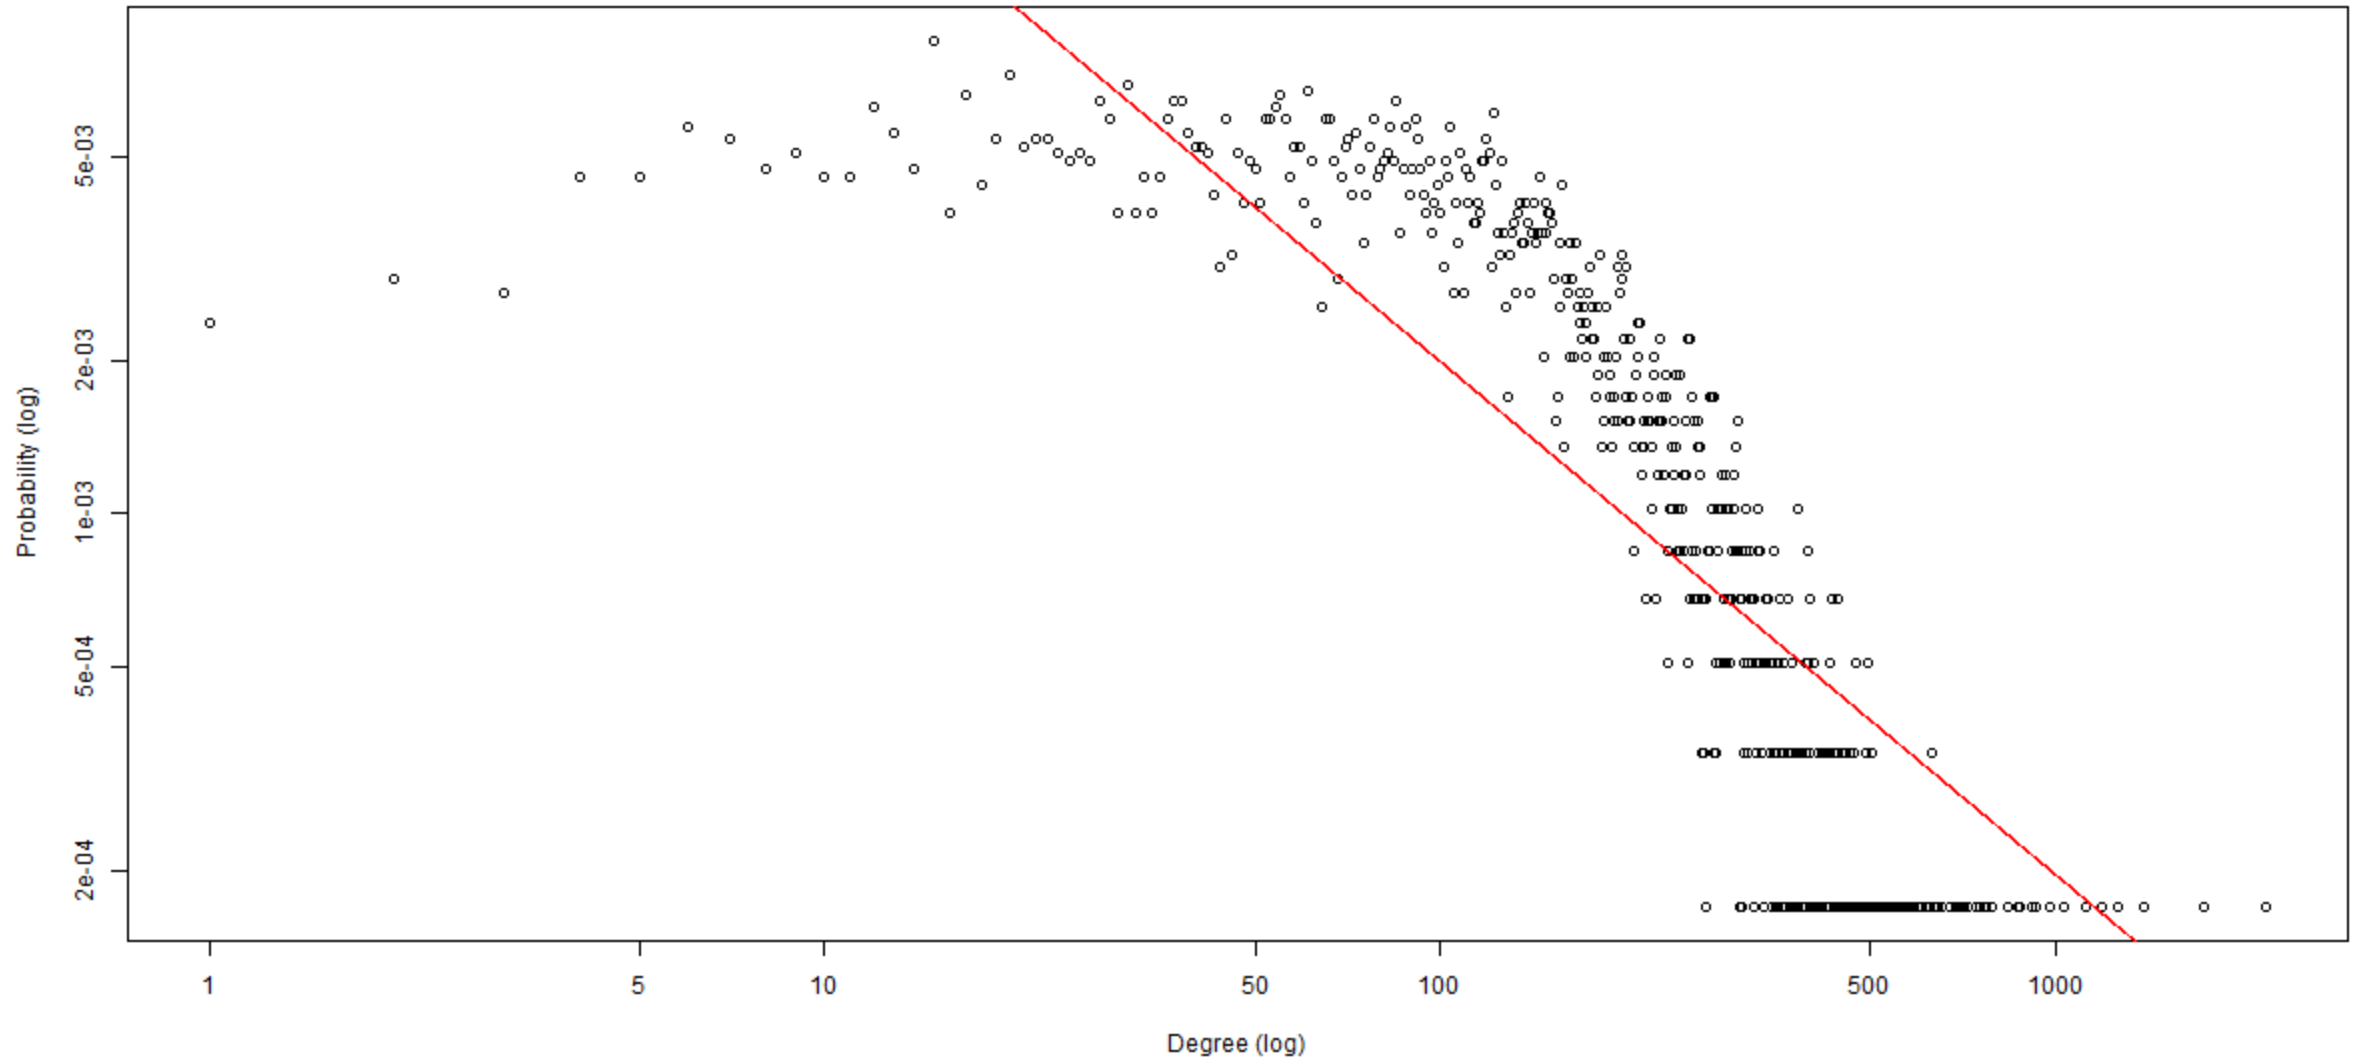



“Textmining\_transferred”

### Degree Distribution

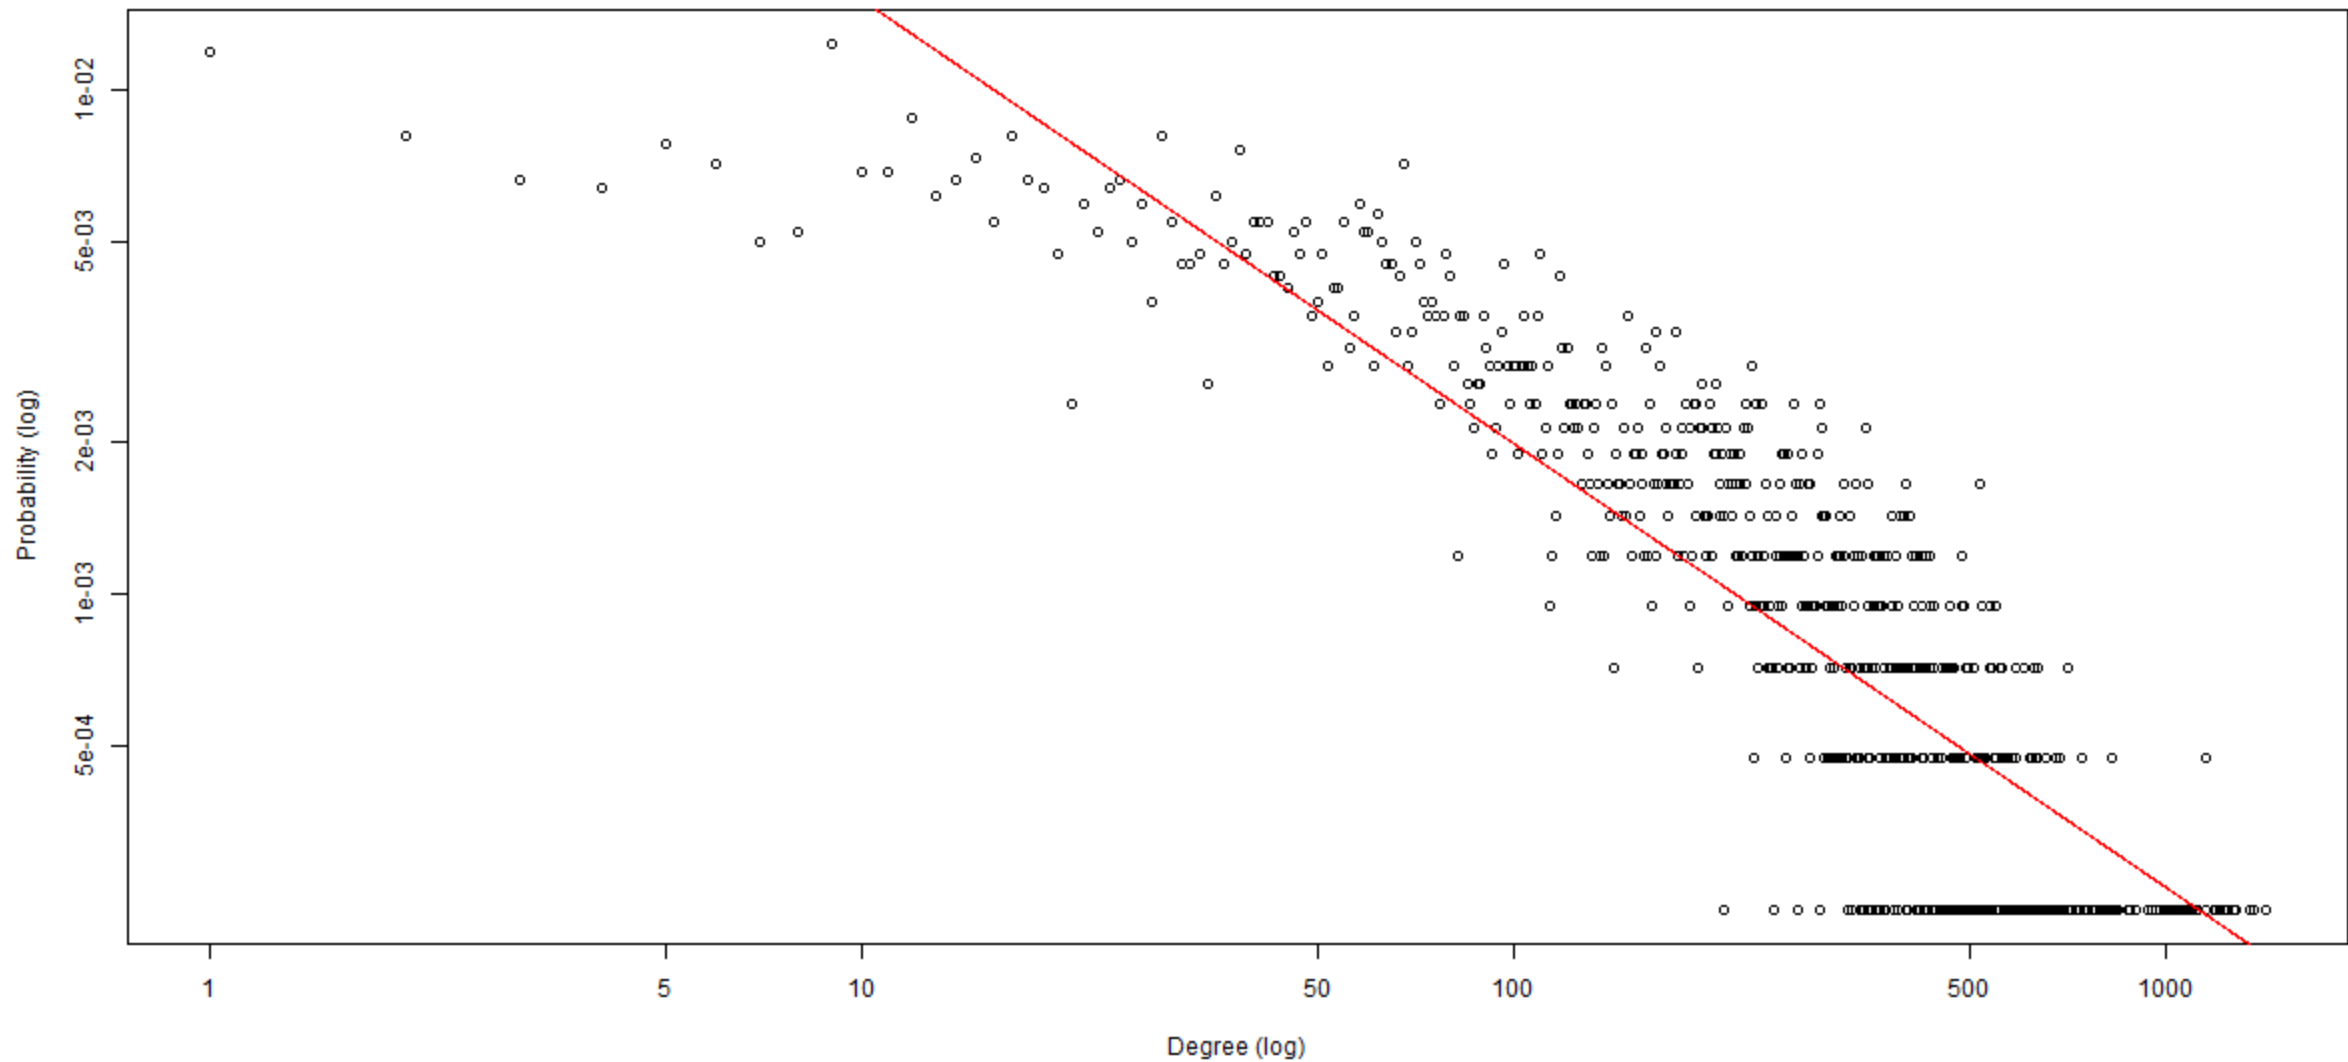

# “Neighborhood\_transferred”

## Degree Distribution

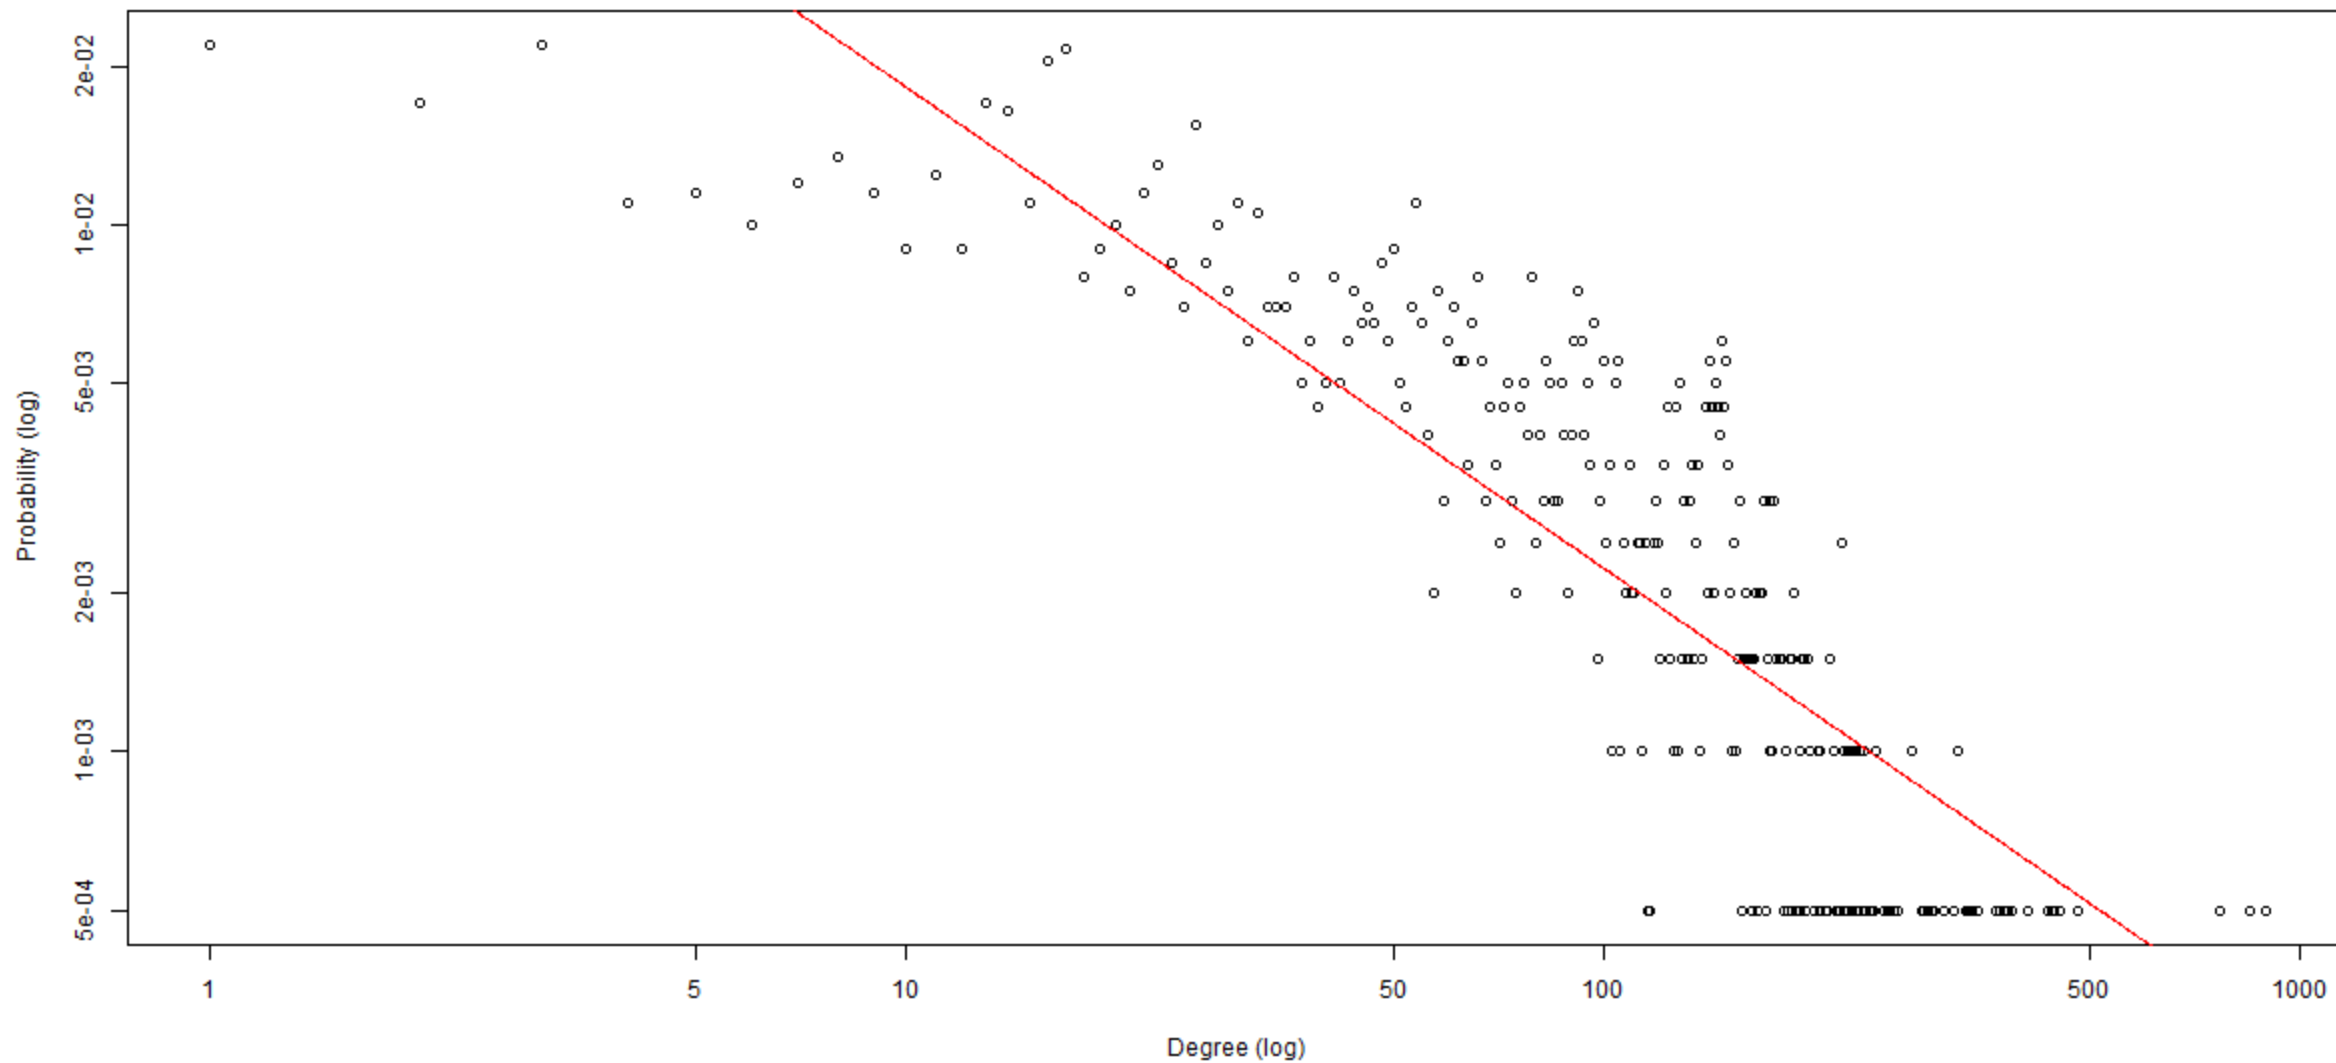

# "Fusion"

## Degree Distribution

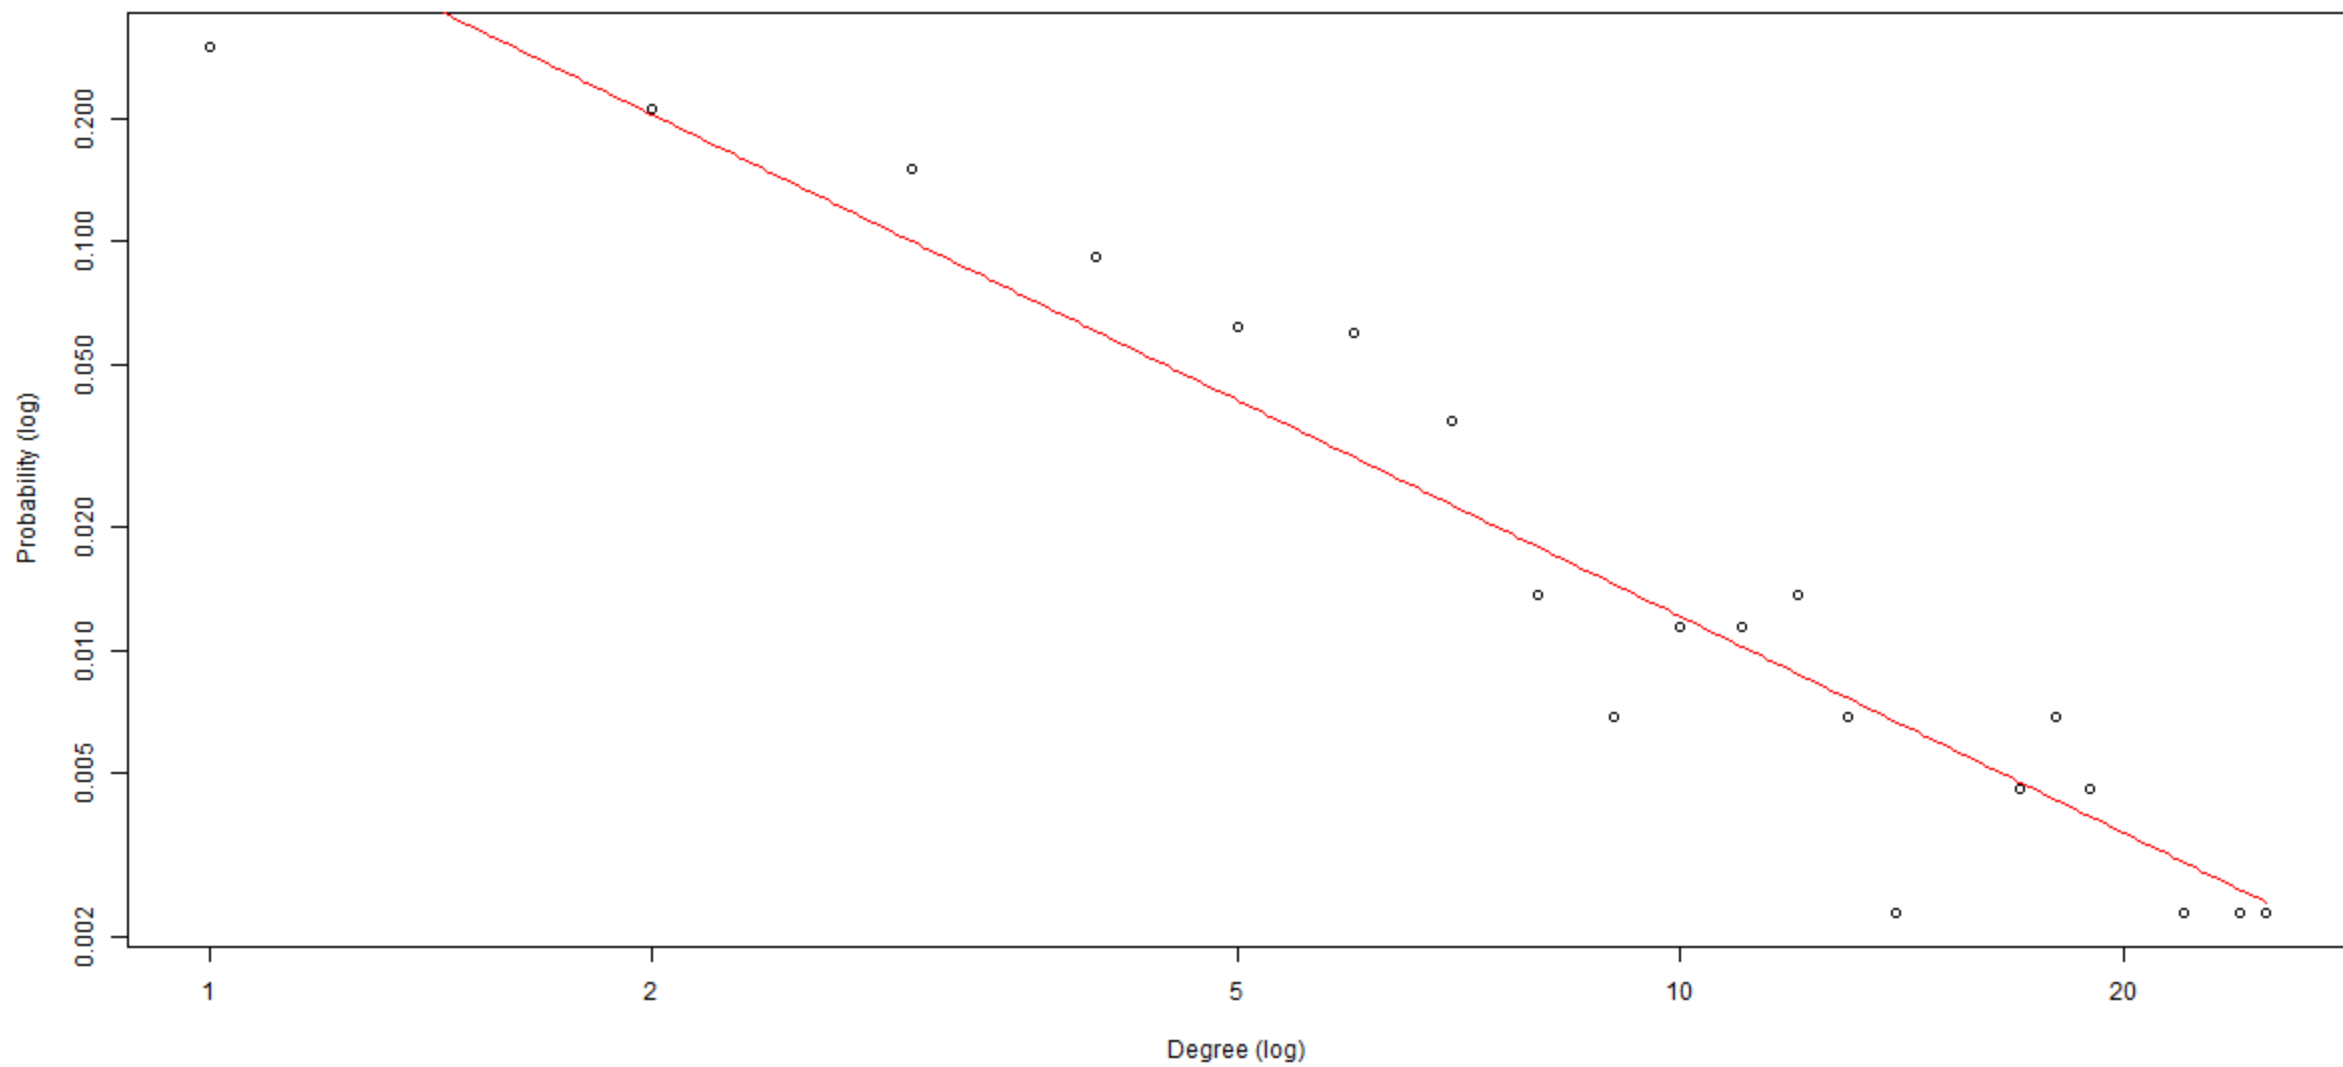

“Combined\_score”

### Degree Distribution

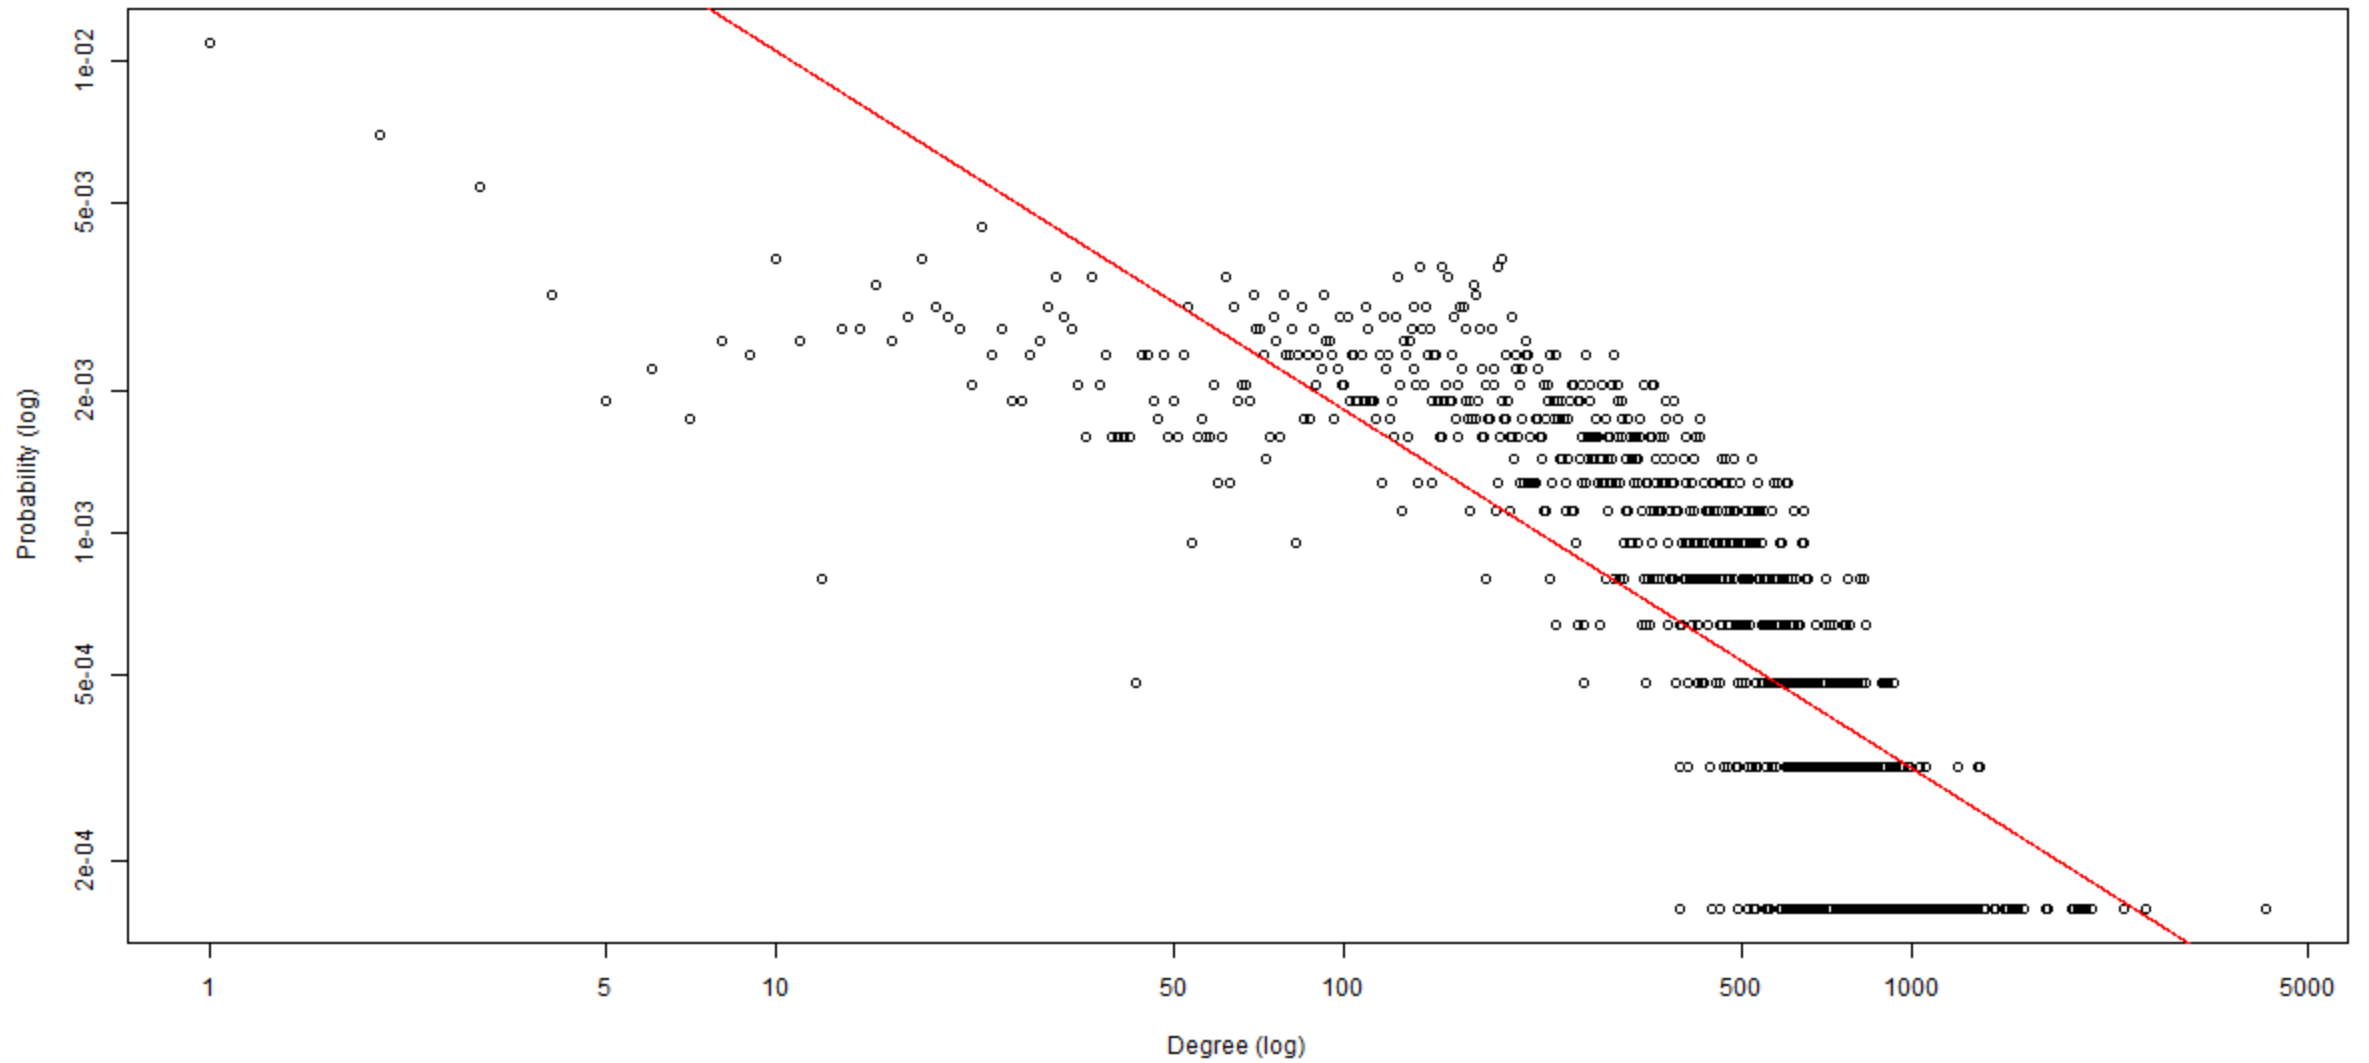

# “Homology”

## Degree Distribution

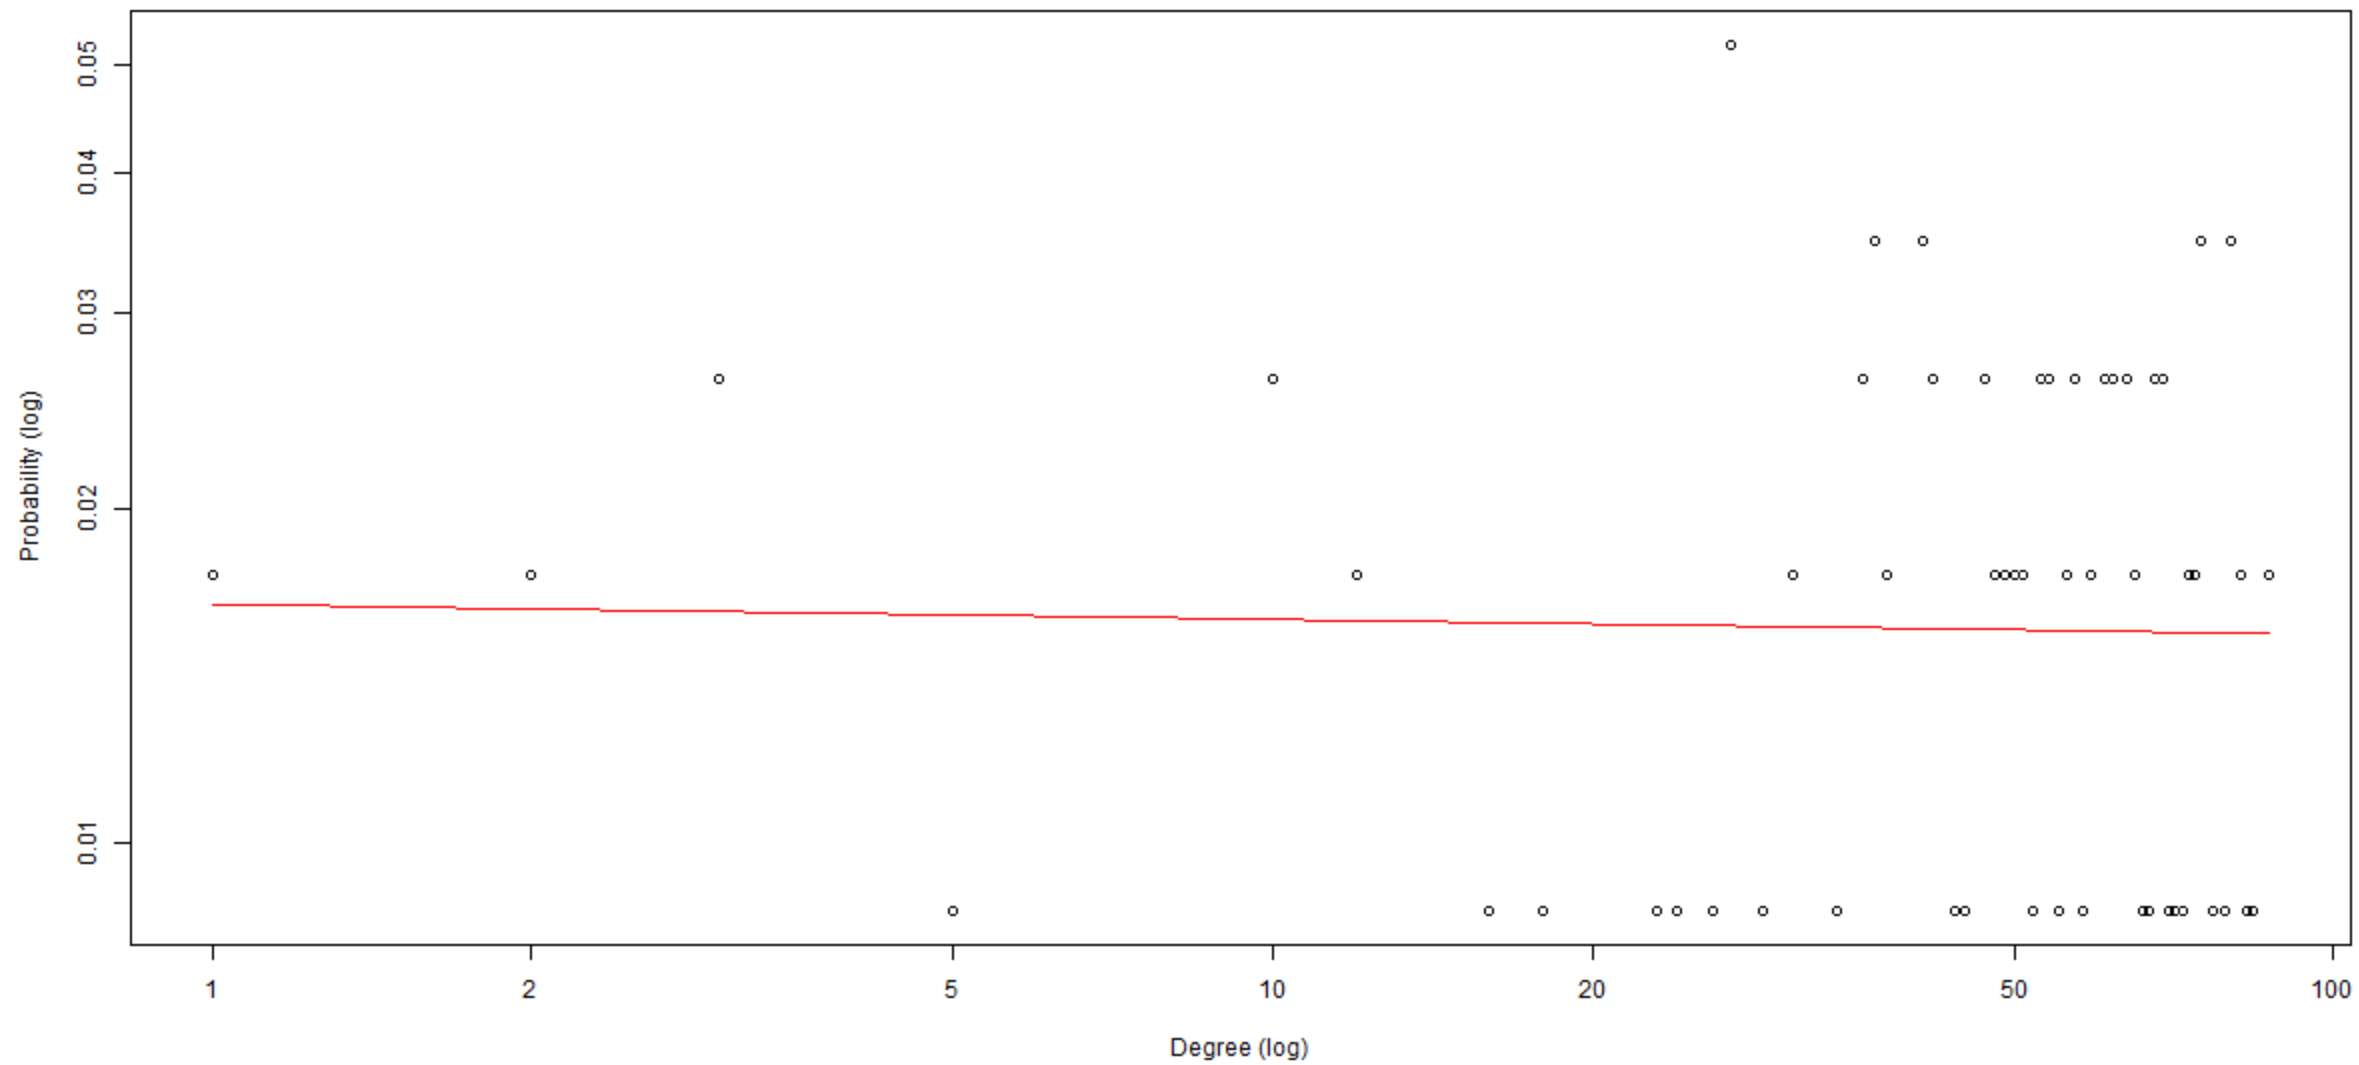

# “Erdős–Rényi”

## Degree Distribution

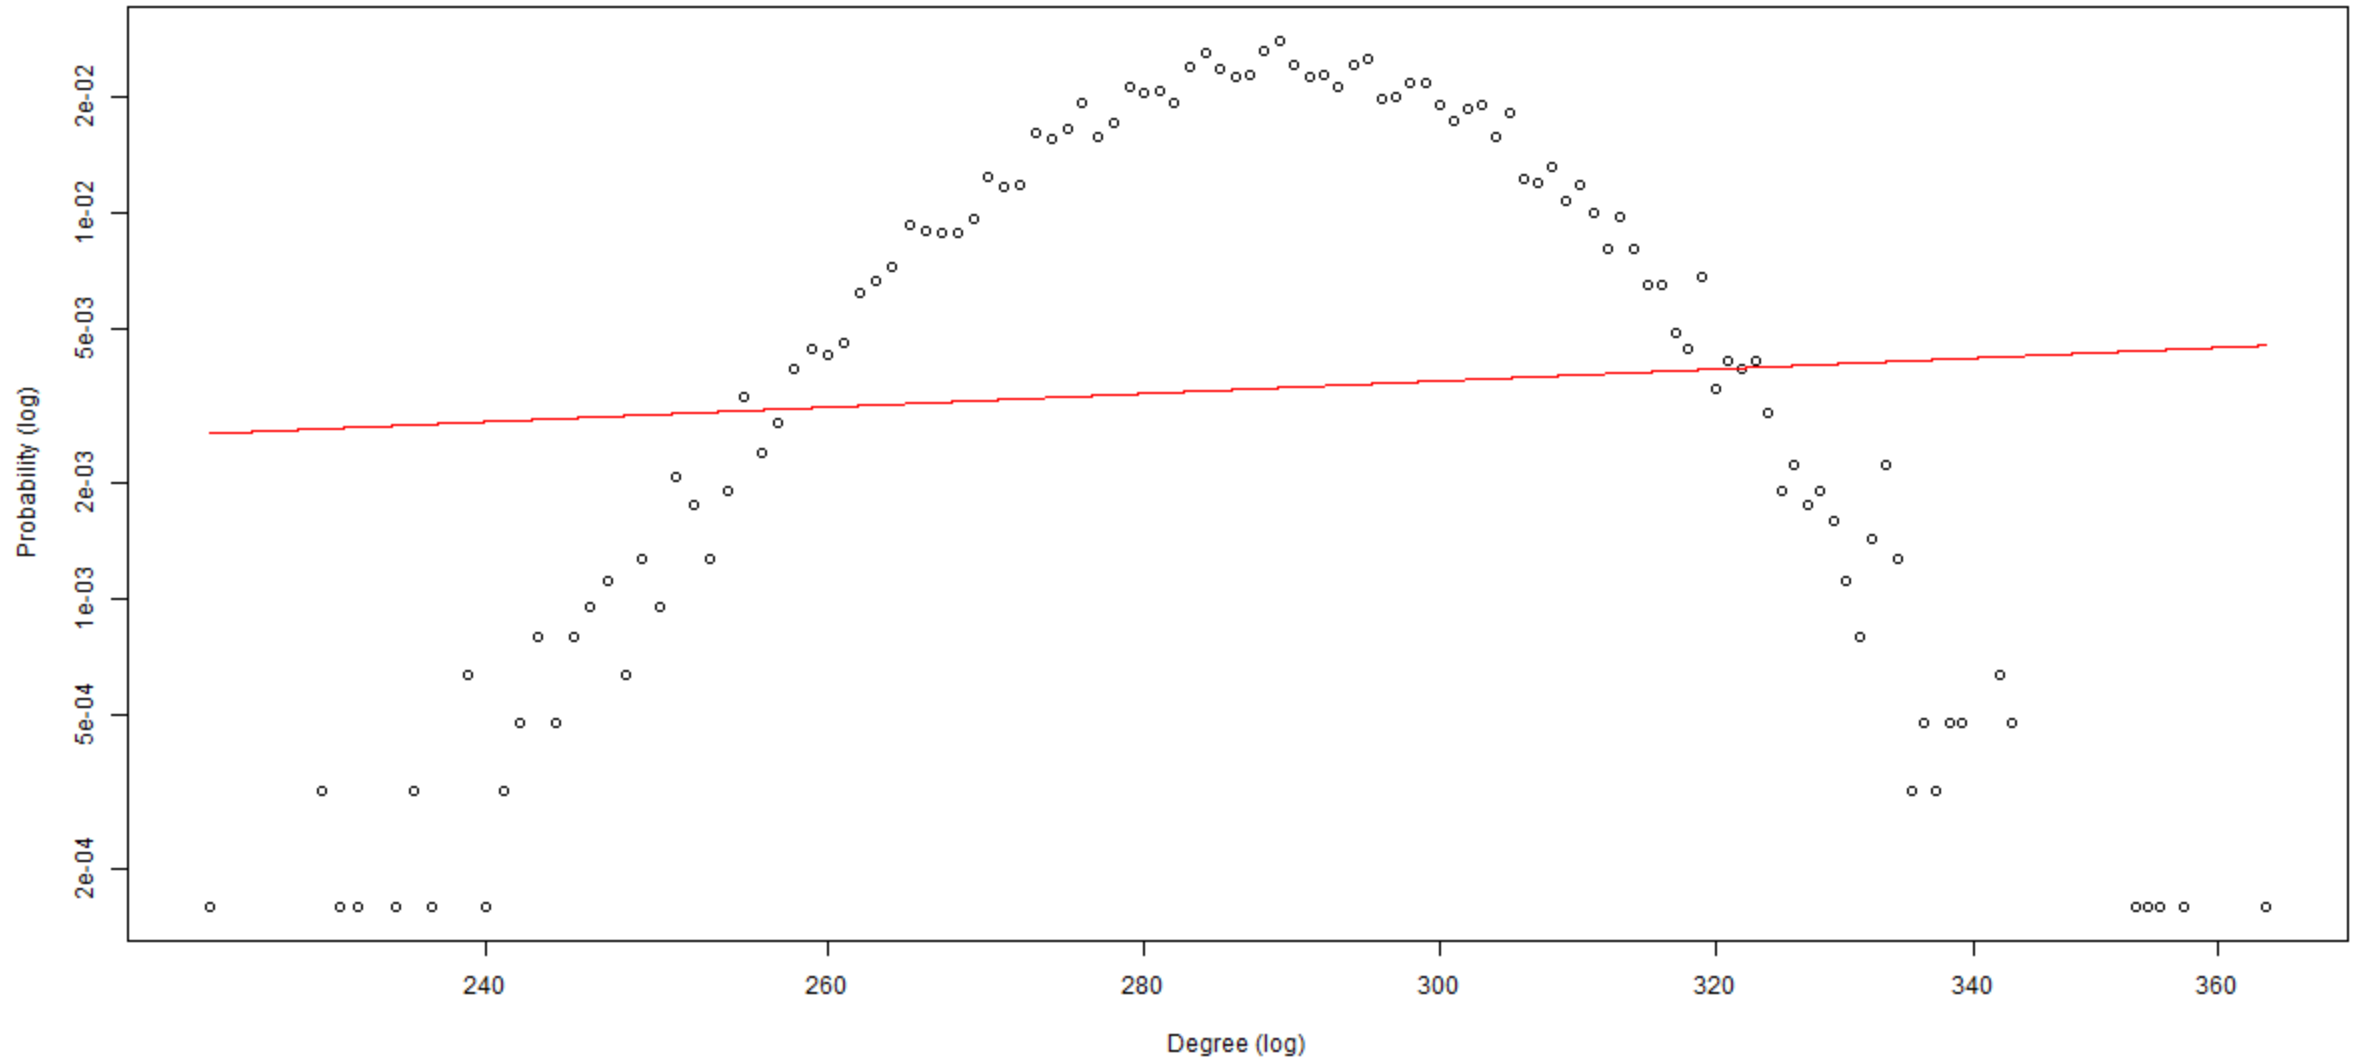

Supplement: 12918_2018_598_MOESM2_ESM.pdf [file 12918_2018_598_MOESM2_ESM.pdf]
