# Supplementary material for: A systematic survey of centrality measures for protein-protein interaction networks
Source: Springer Nature journal article supplement (doi:10.1186/s12918-018-0598-2), 2018-07-31

# “Coexpression”

Contribution of variables to Dim-1-2-3

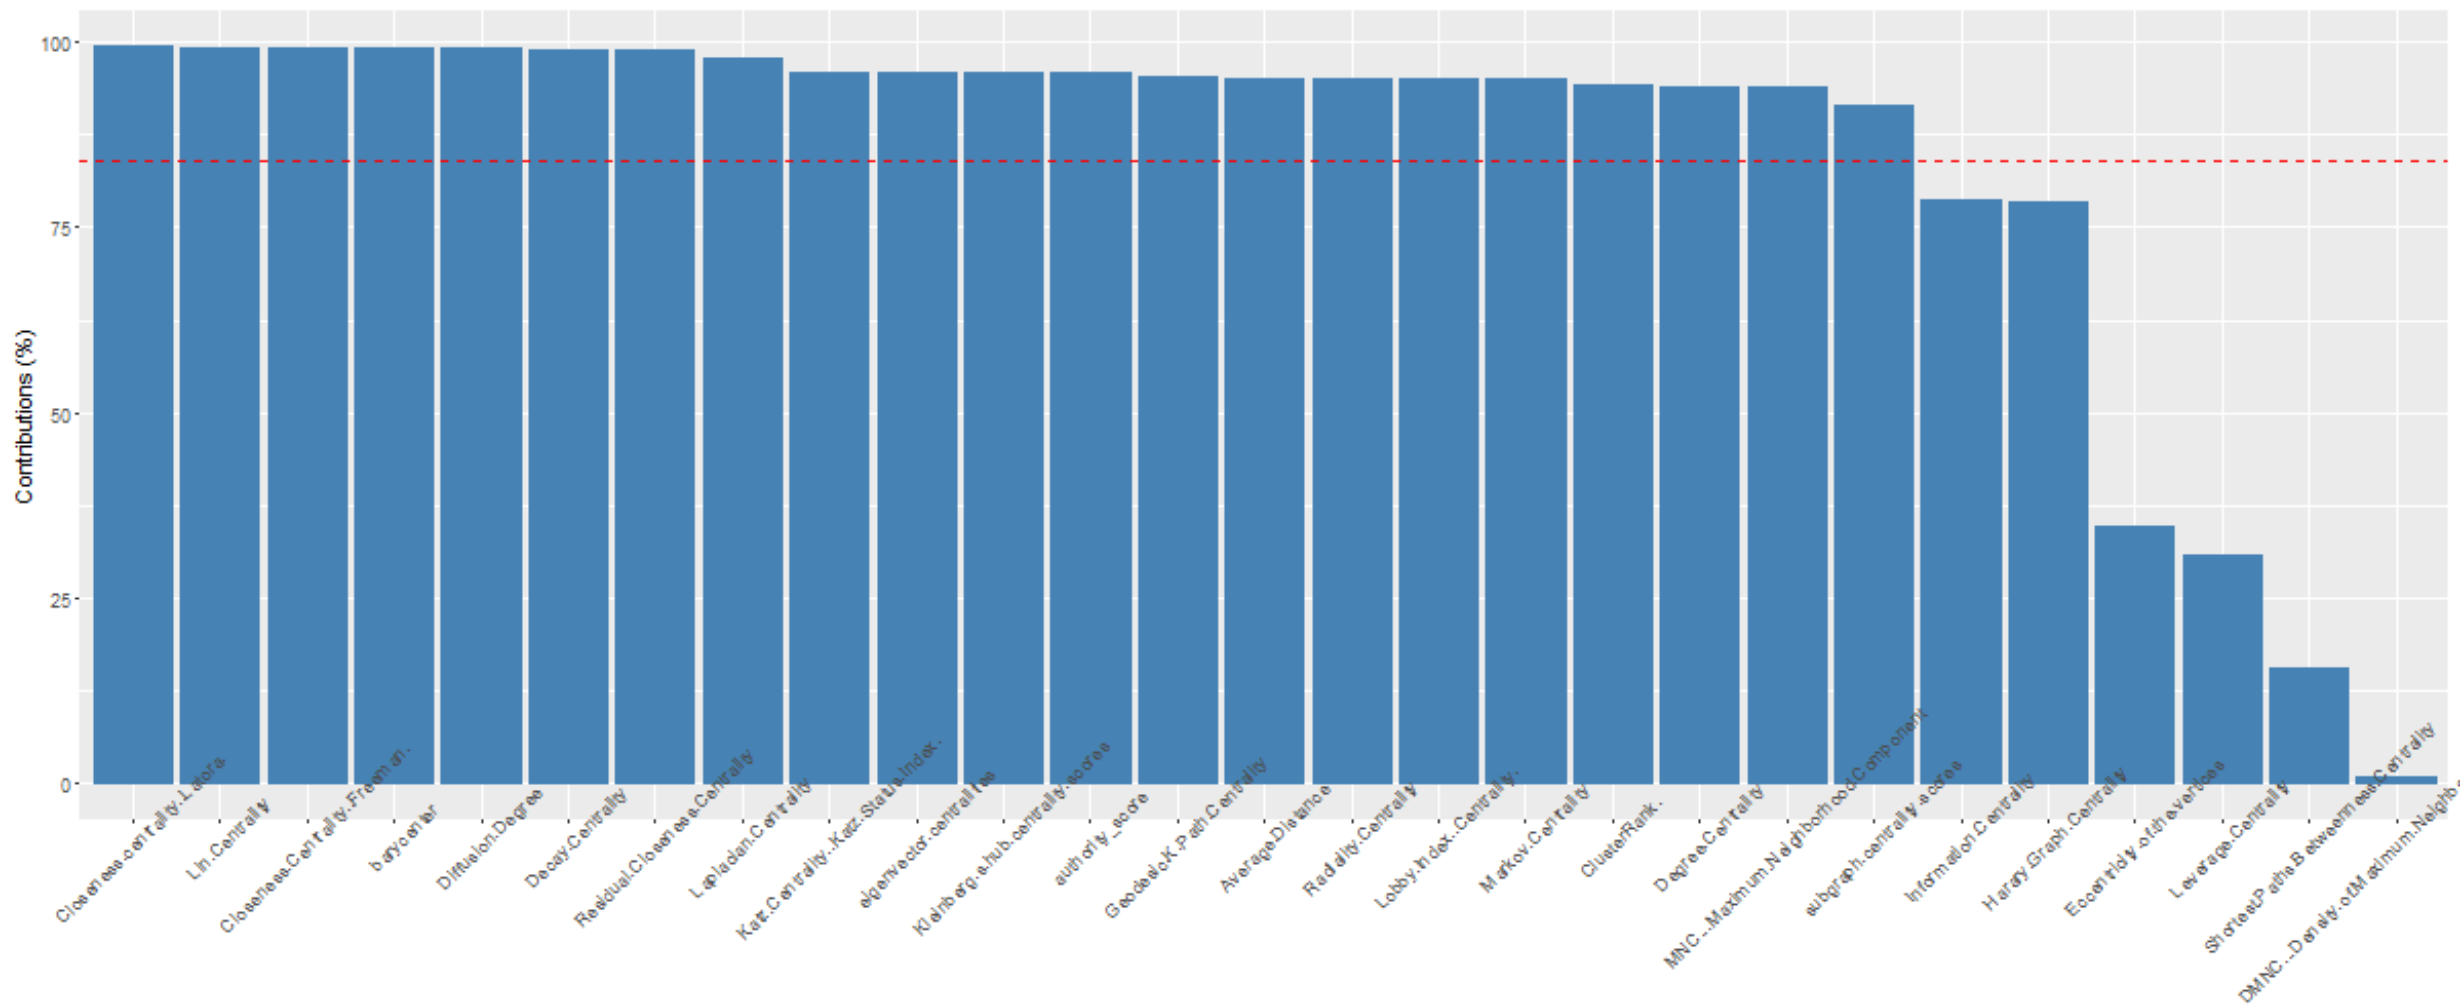

# “Coexpression\_transferred”

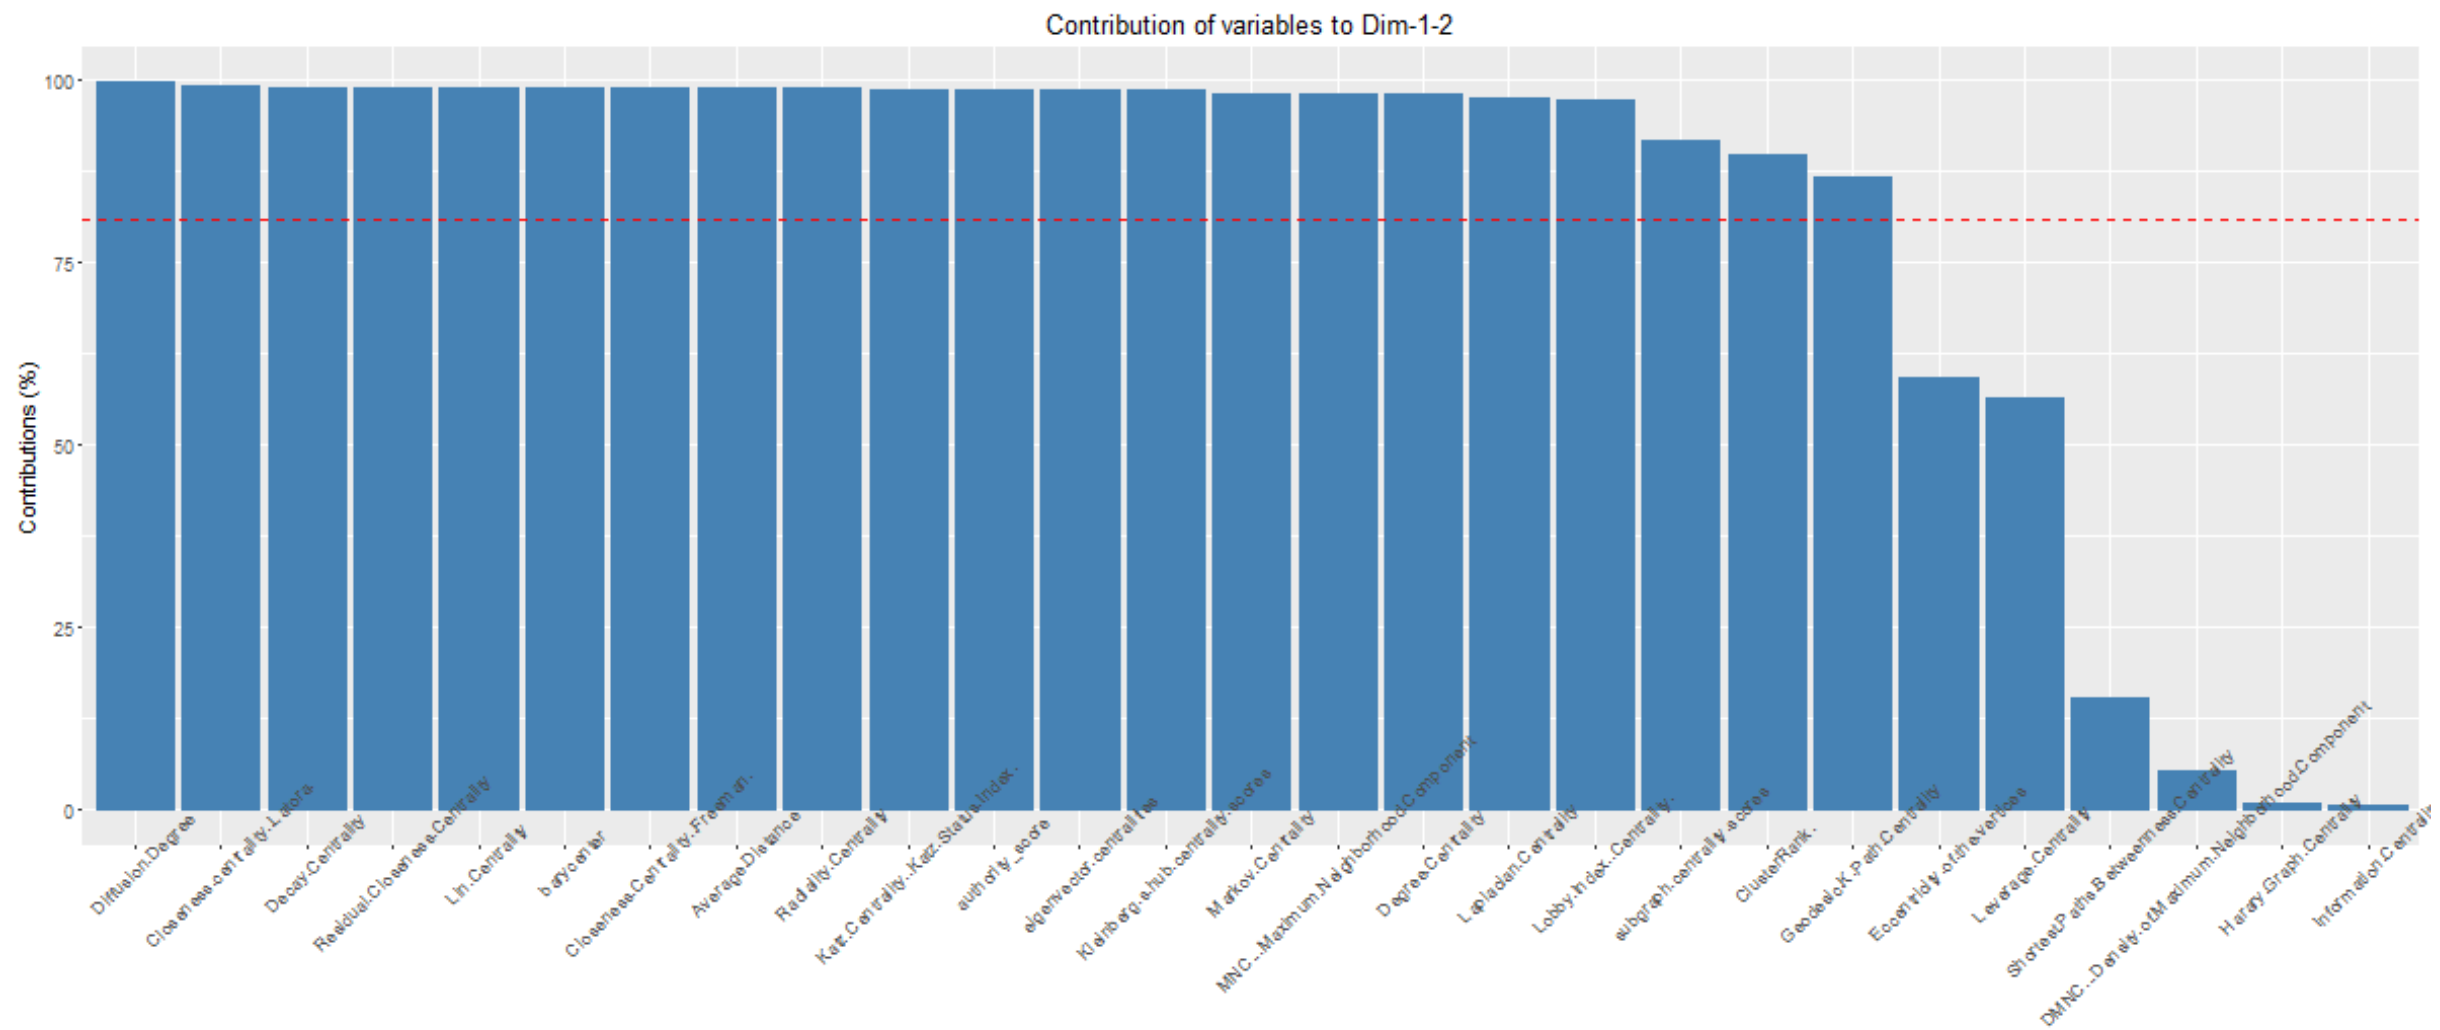

# “Cooccurrence”

Contribution of variables to Dim-1-2-3

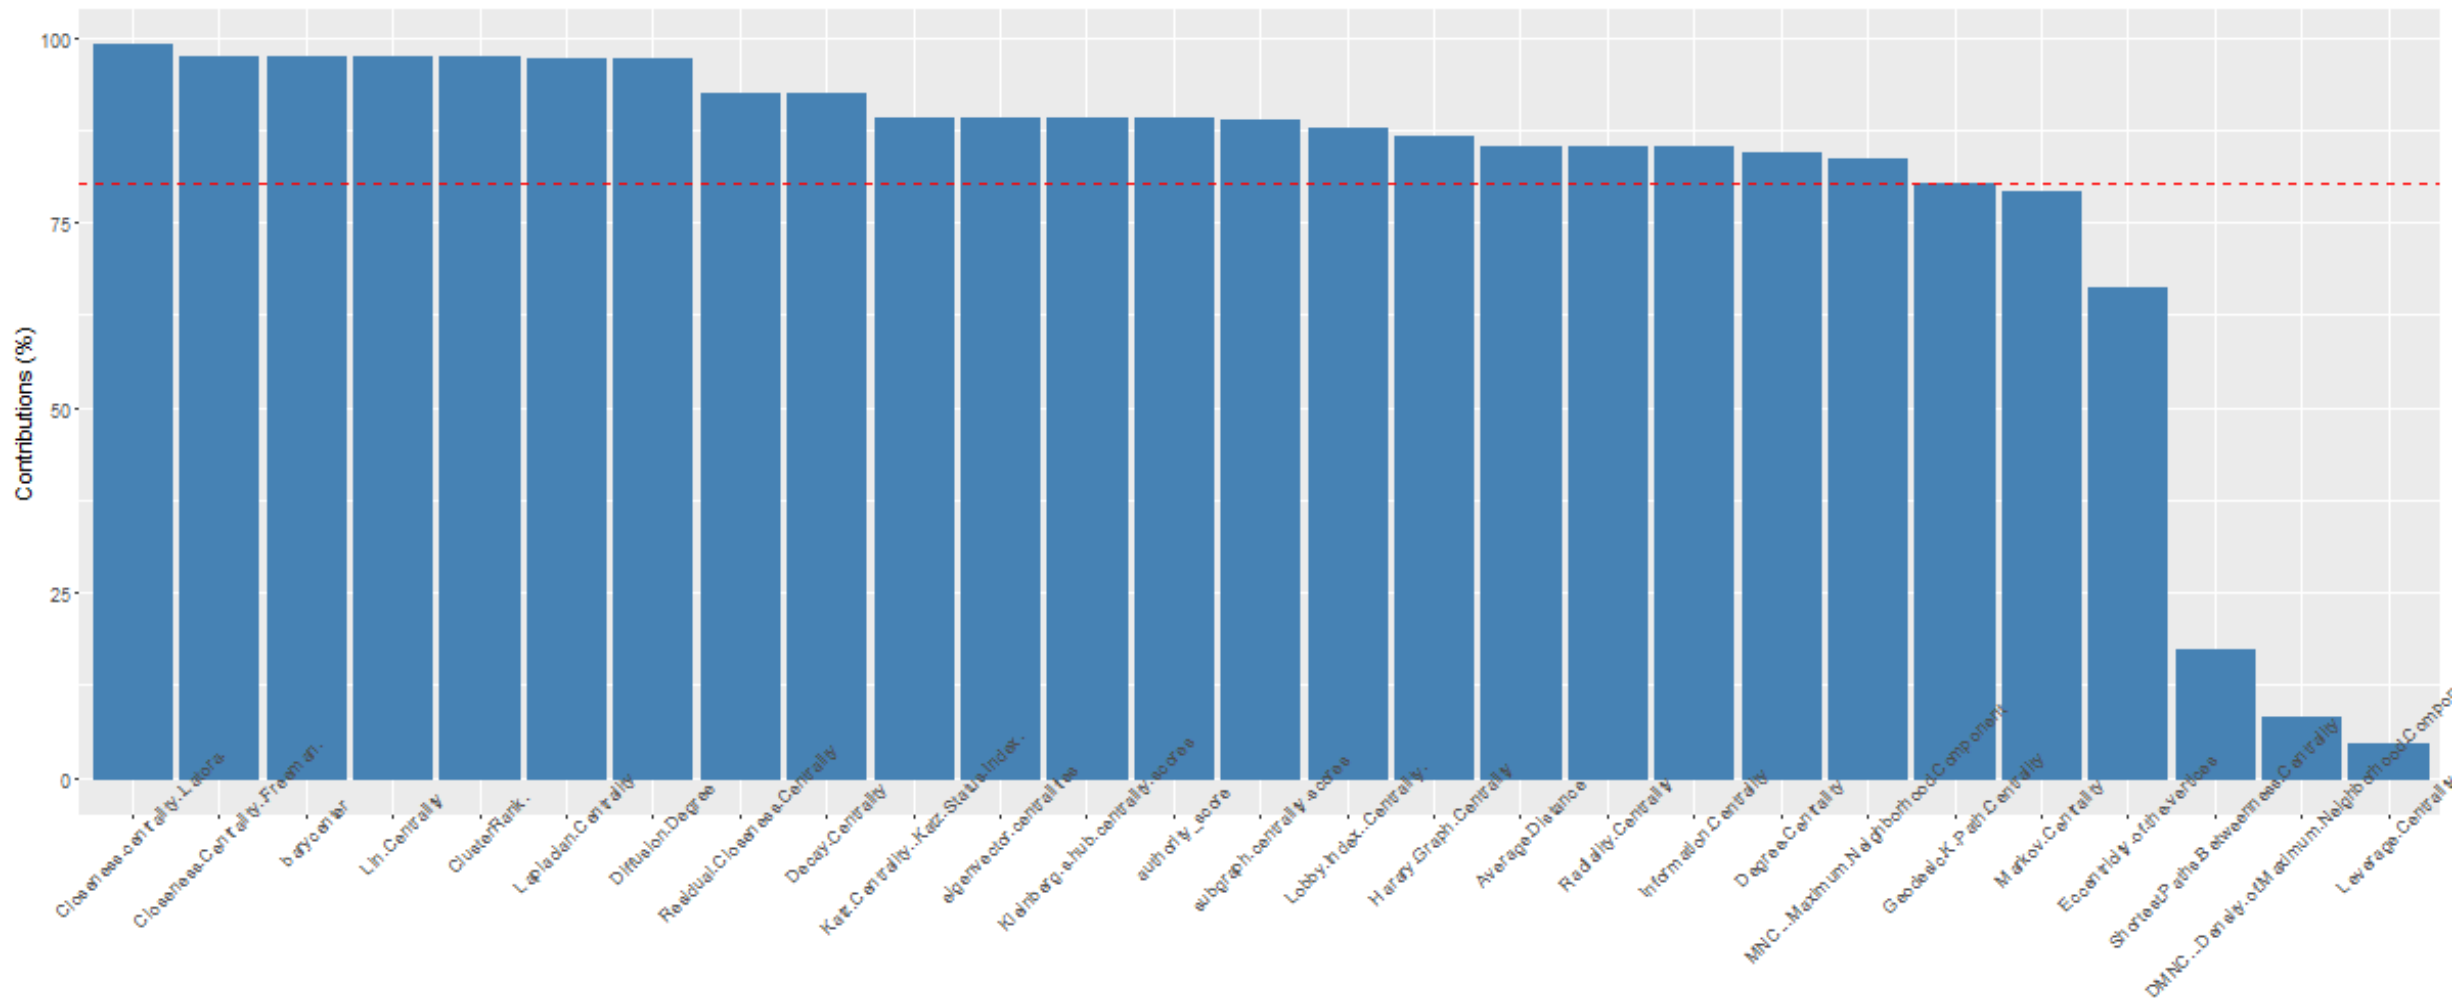

# "Database"

Contribution of variables to Dim-1-2-3

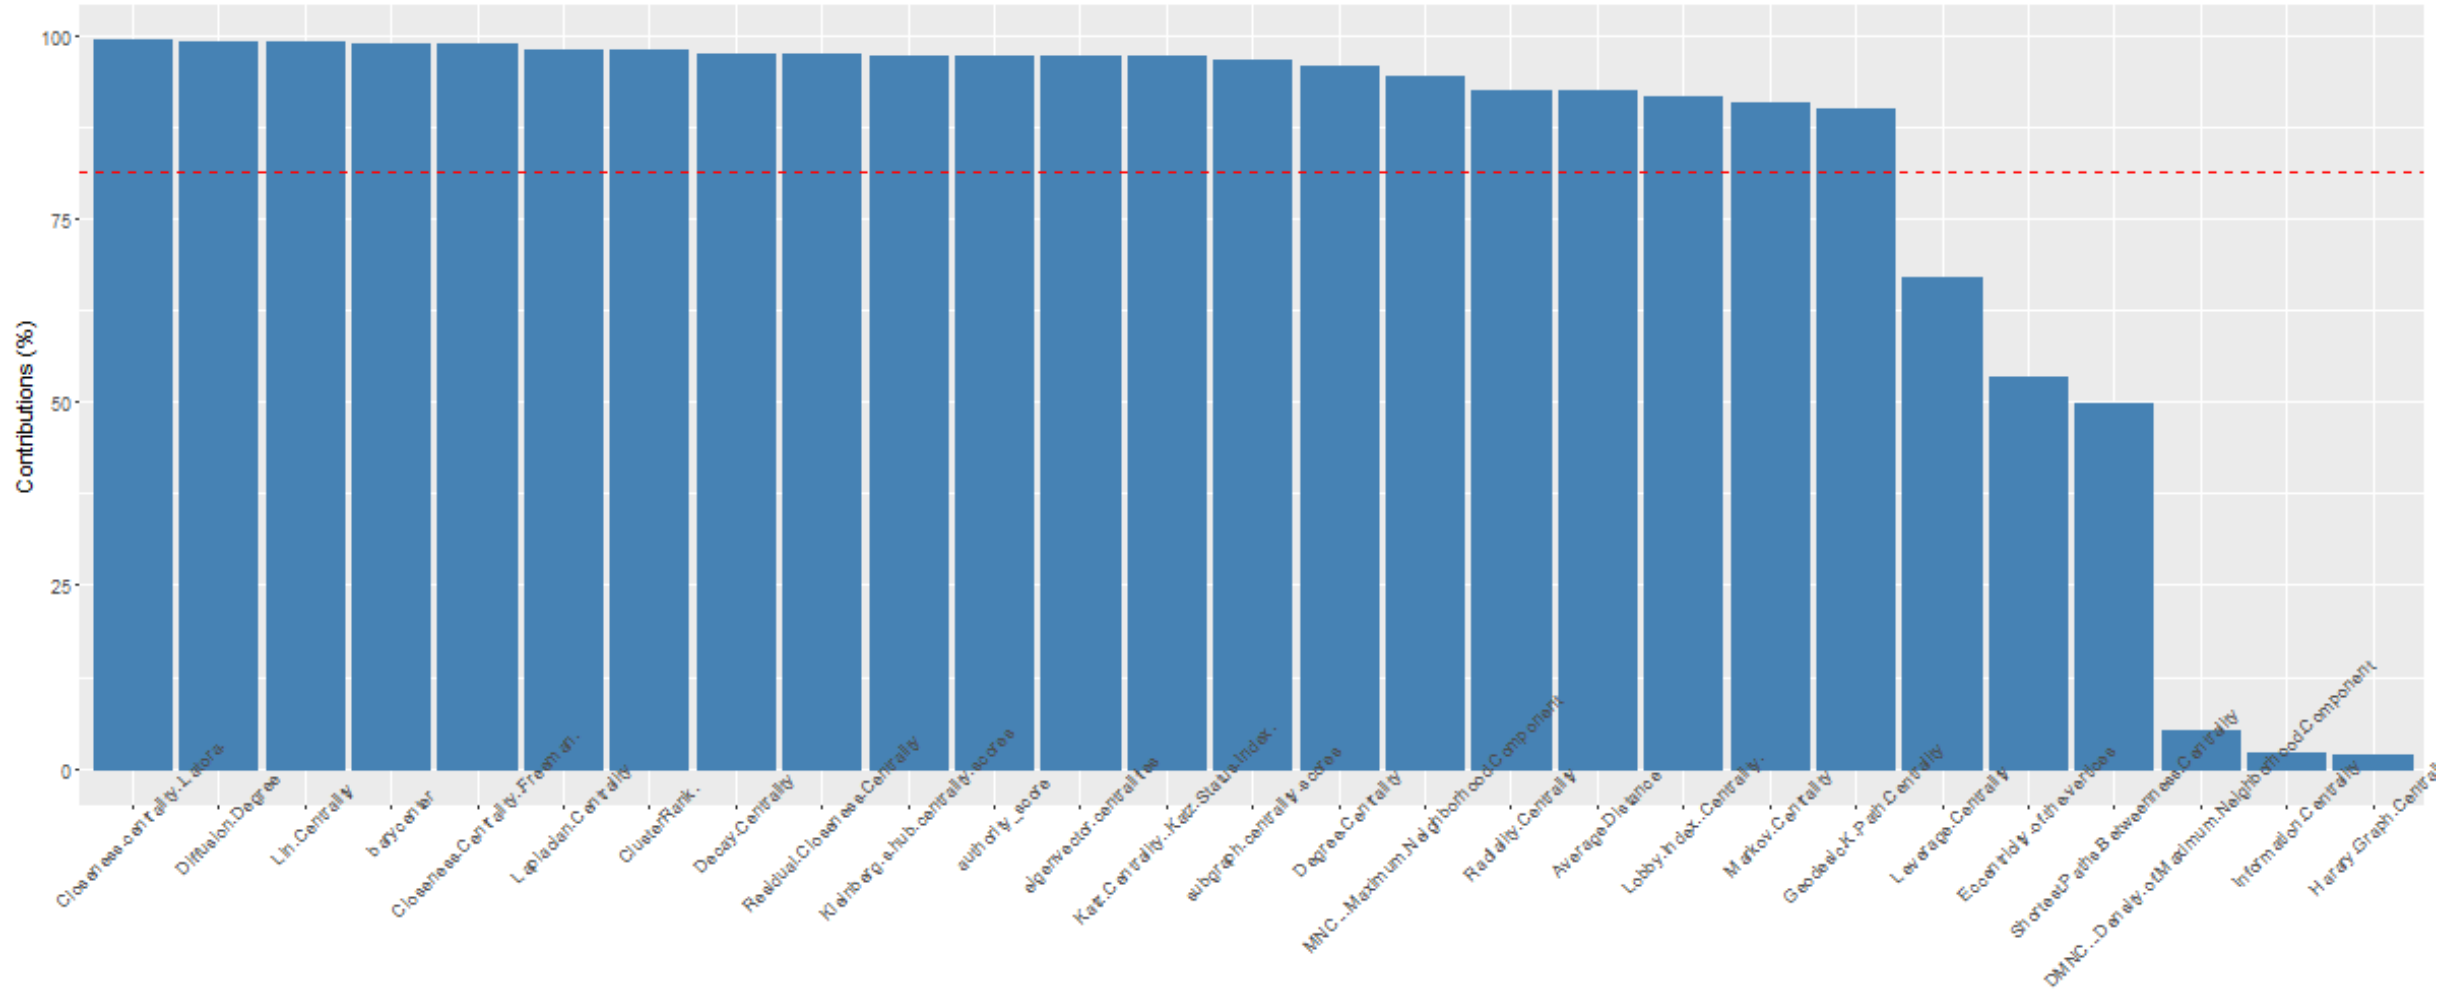

# “Database\_transferred”

## Contribution of variables to Dim-1-2-3

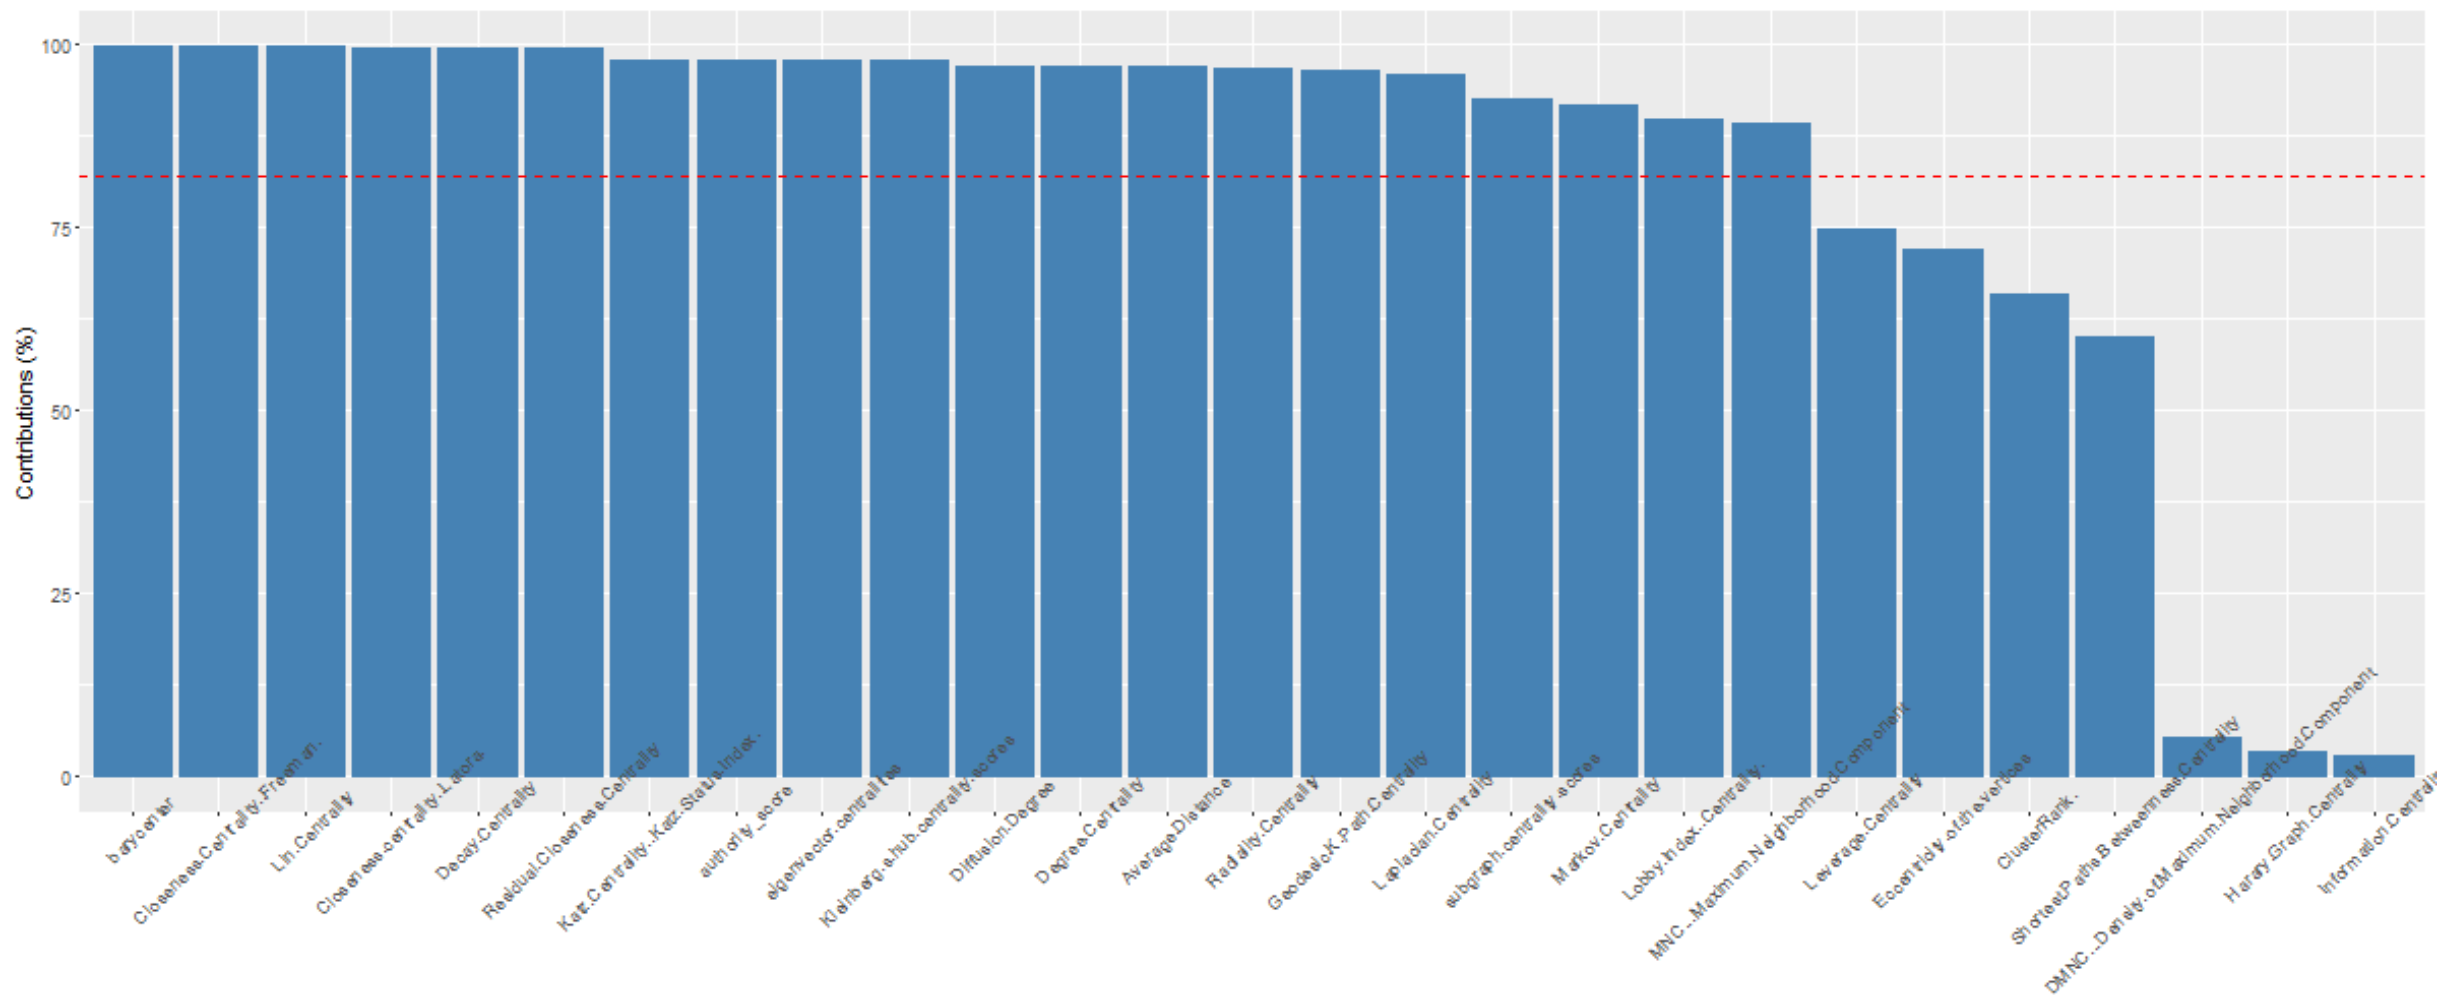

# "Experiments"

Contribution of variables to Dim-1-2-3

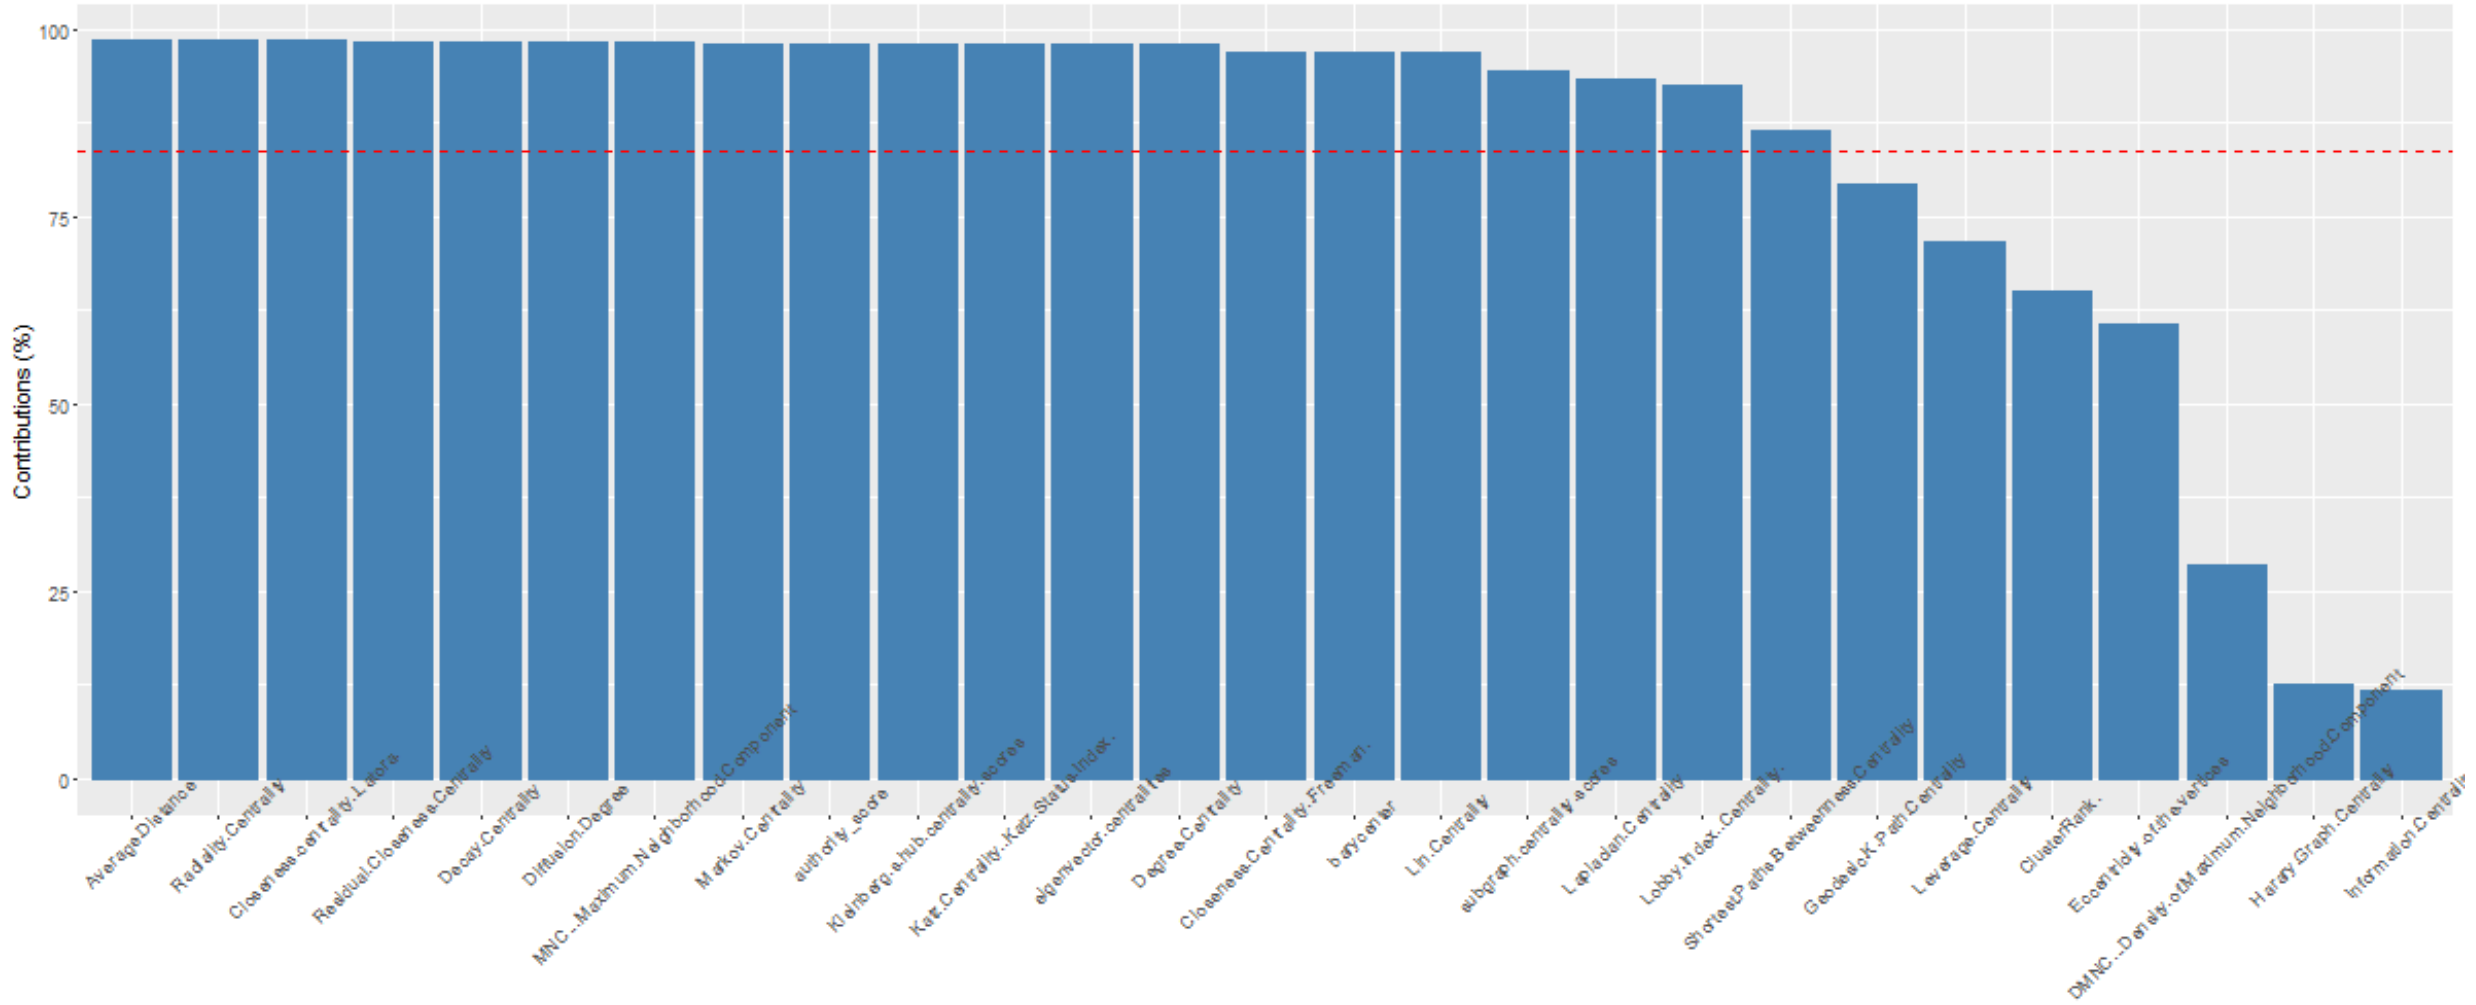

# "Experiments\_transferred"

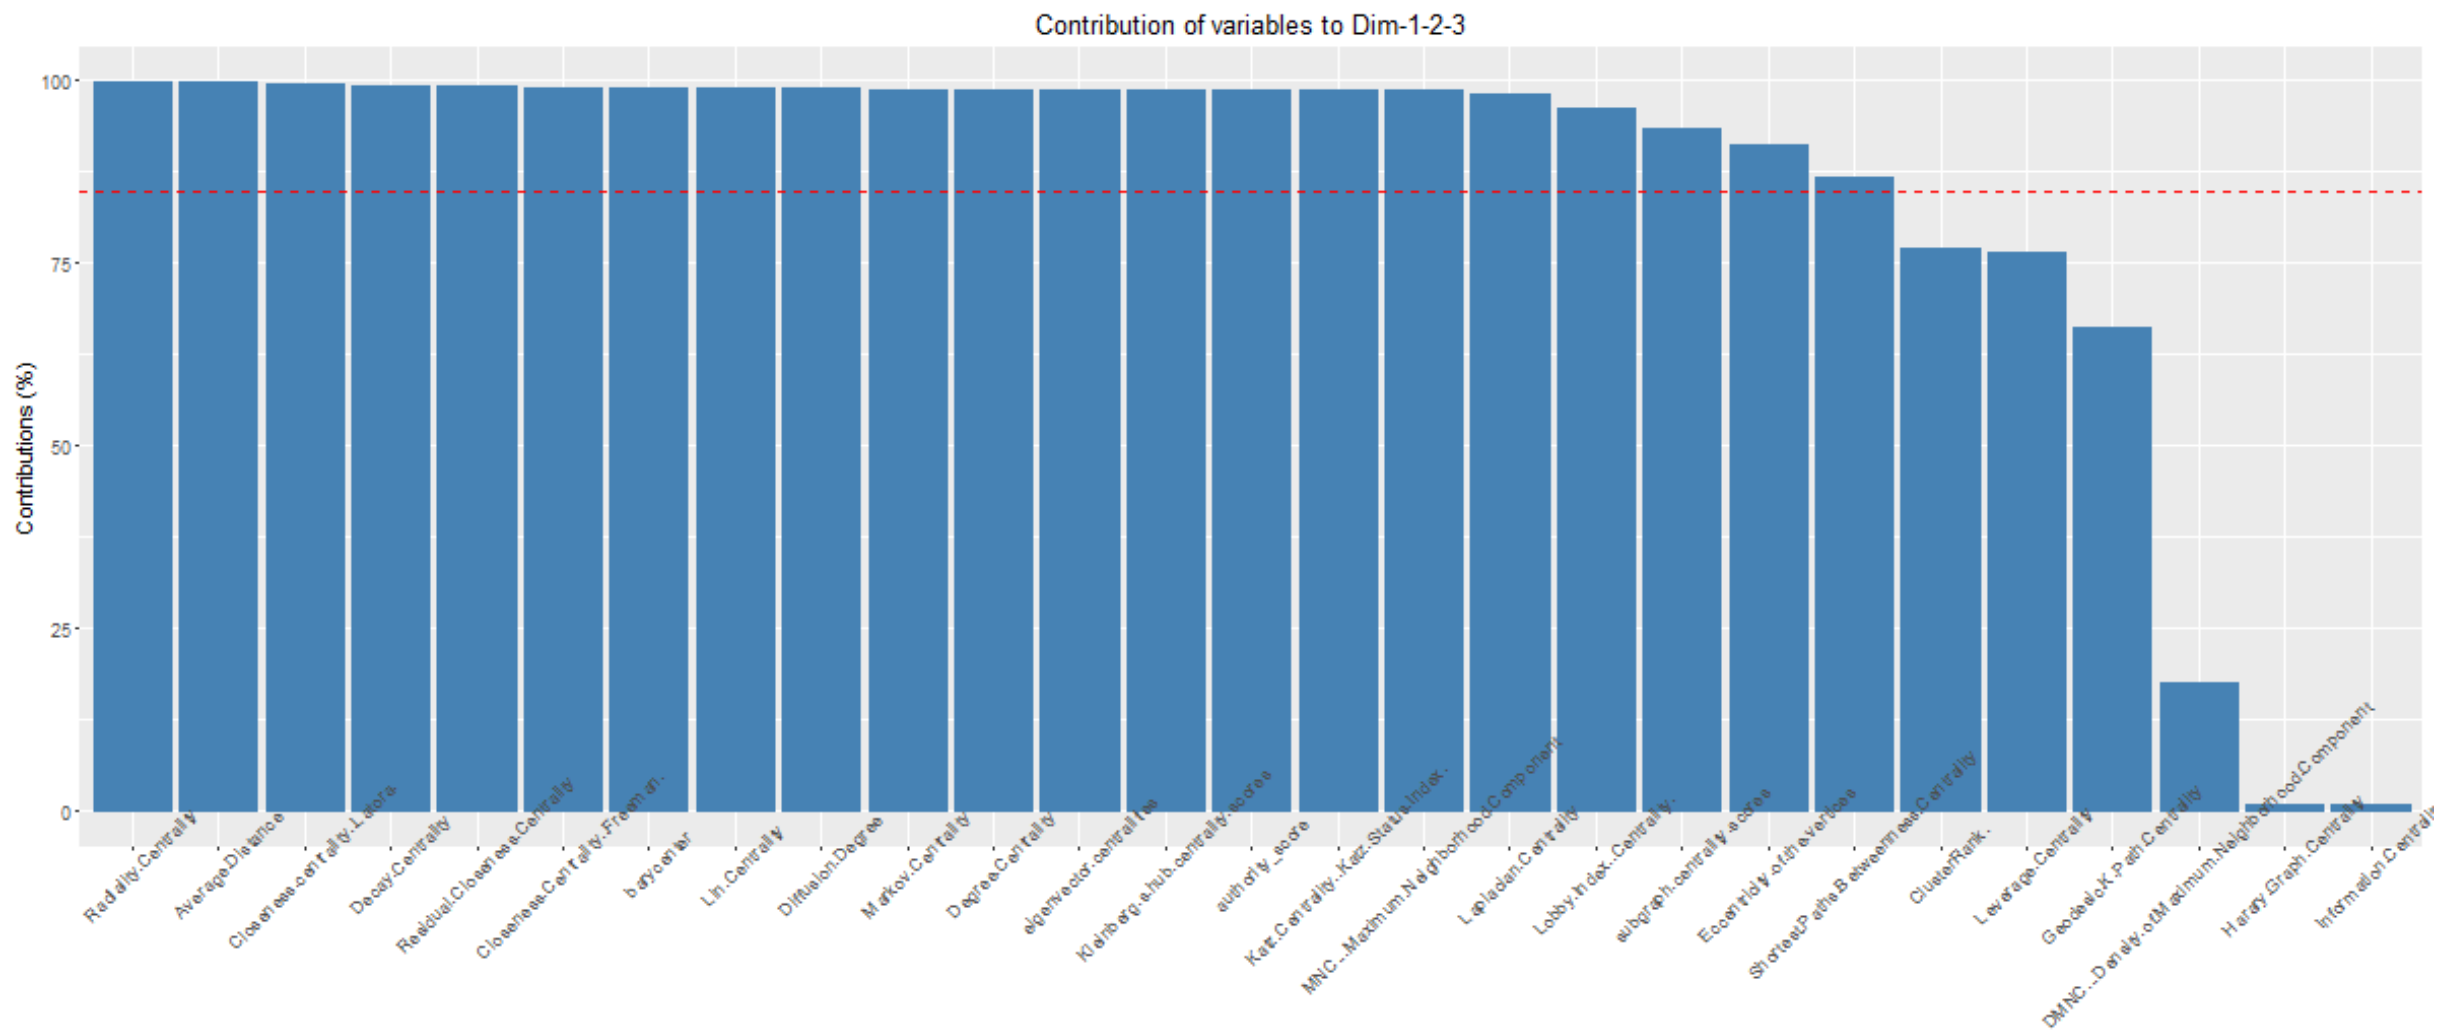

# "Textmining"

Contribution of variables to Dim-1-2-3

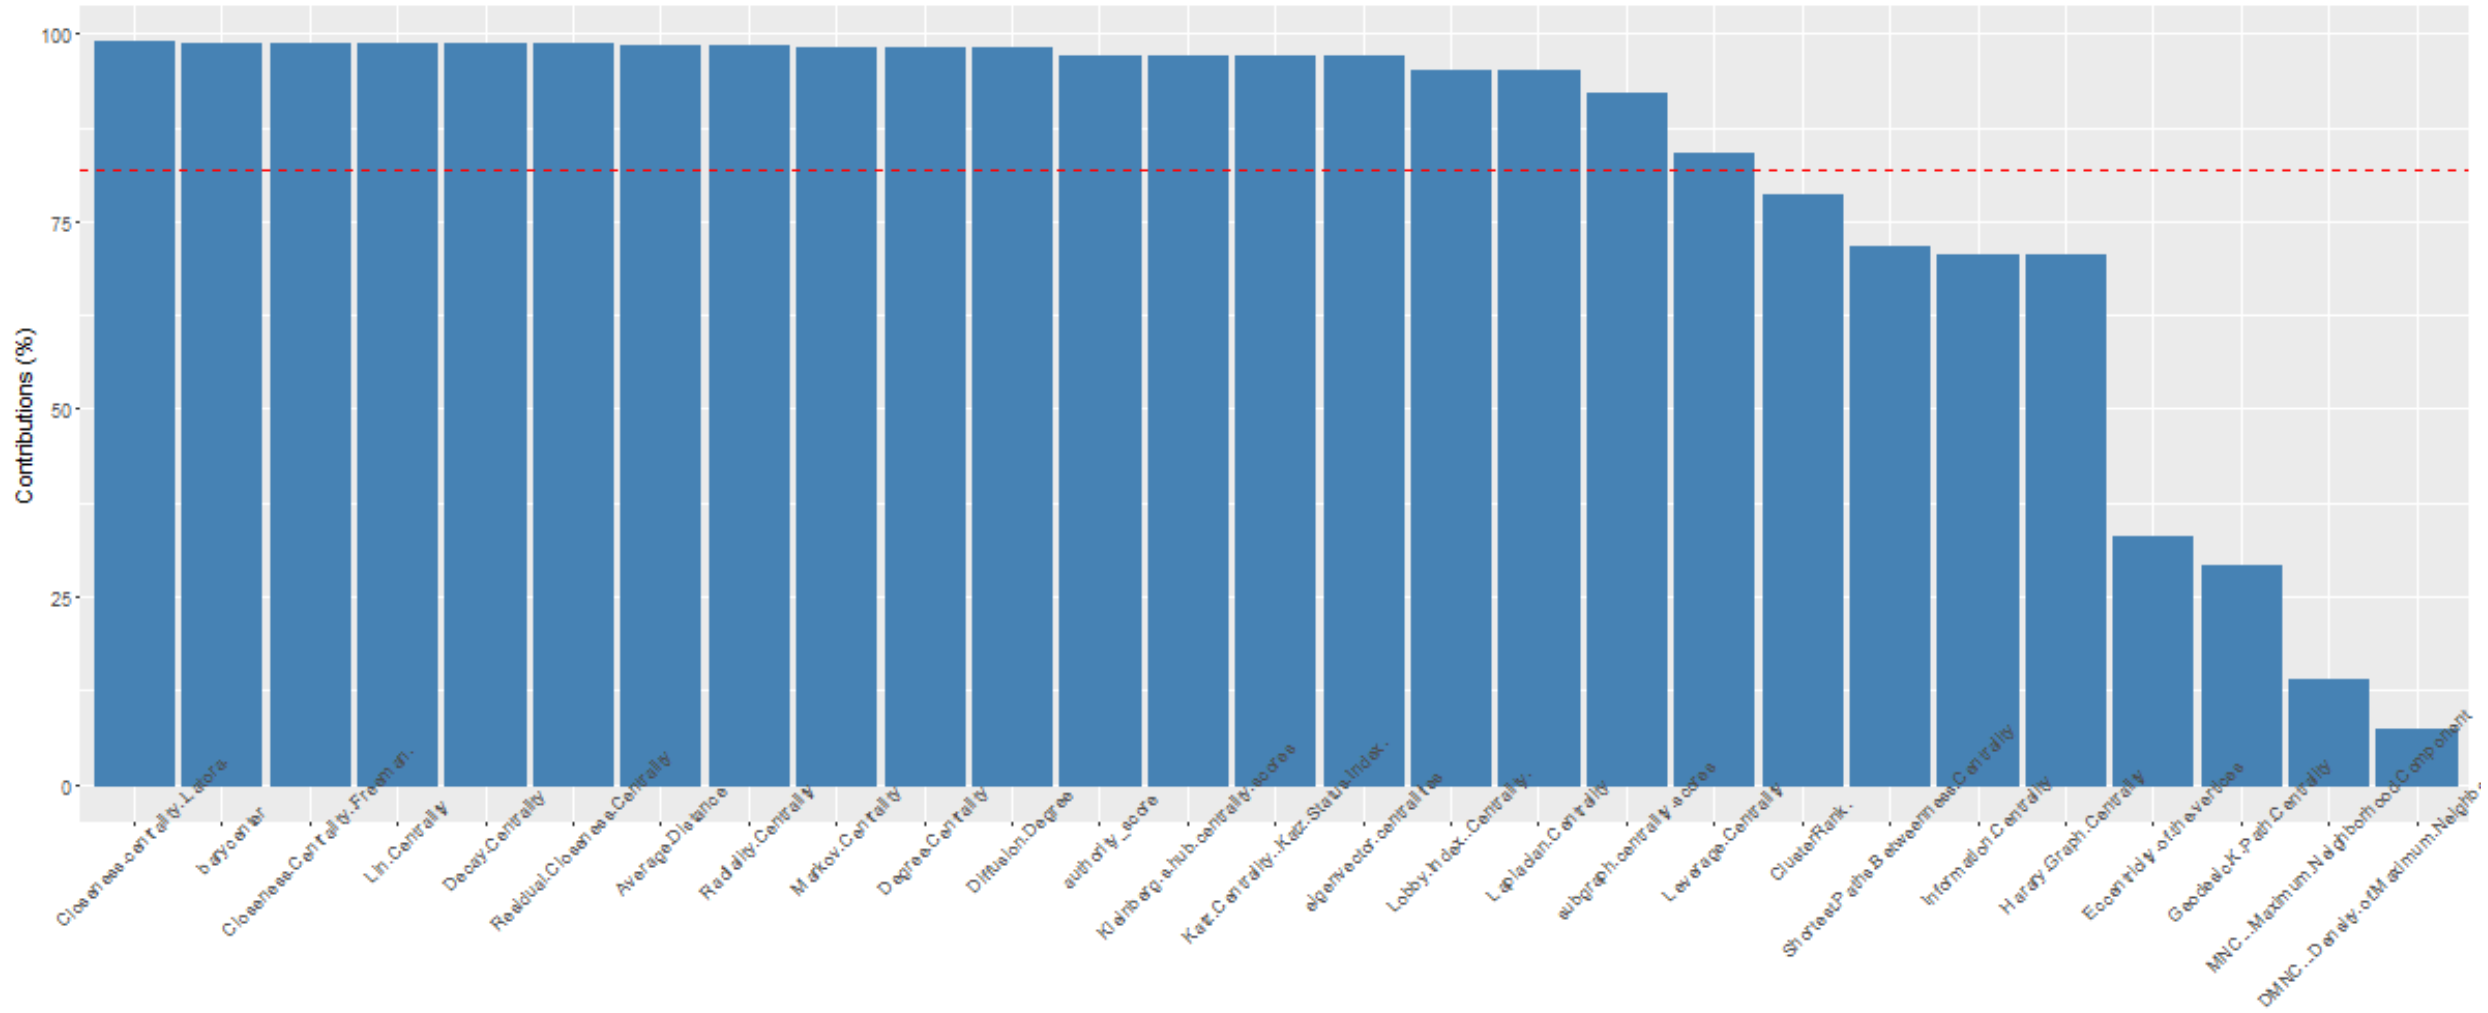



# "Textmining\_transferred"

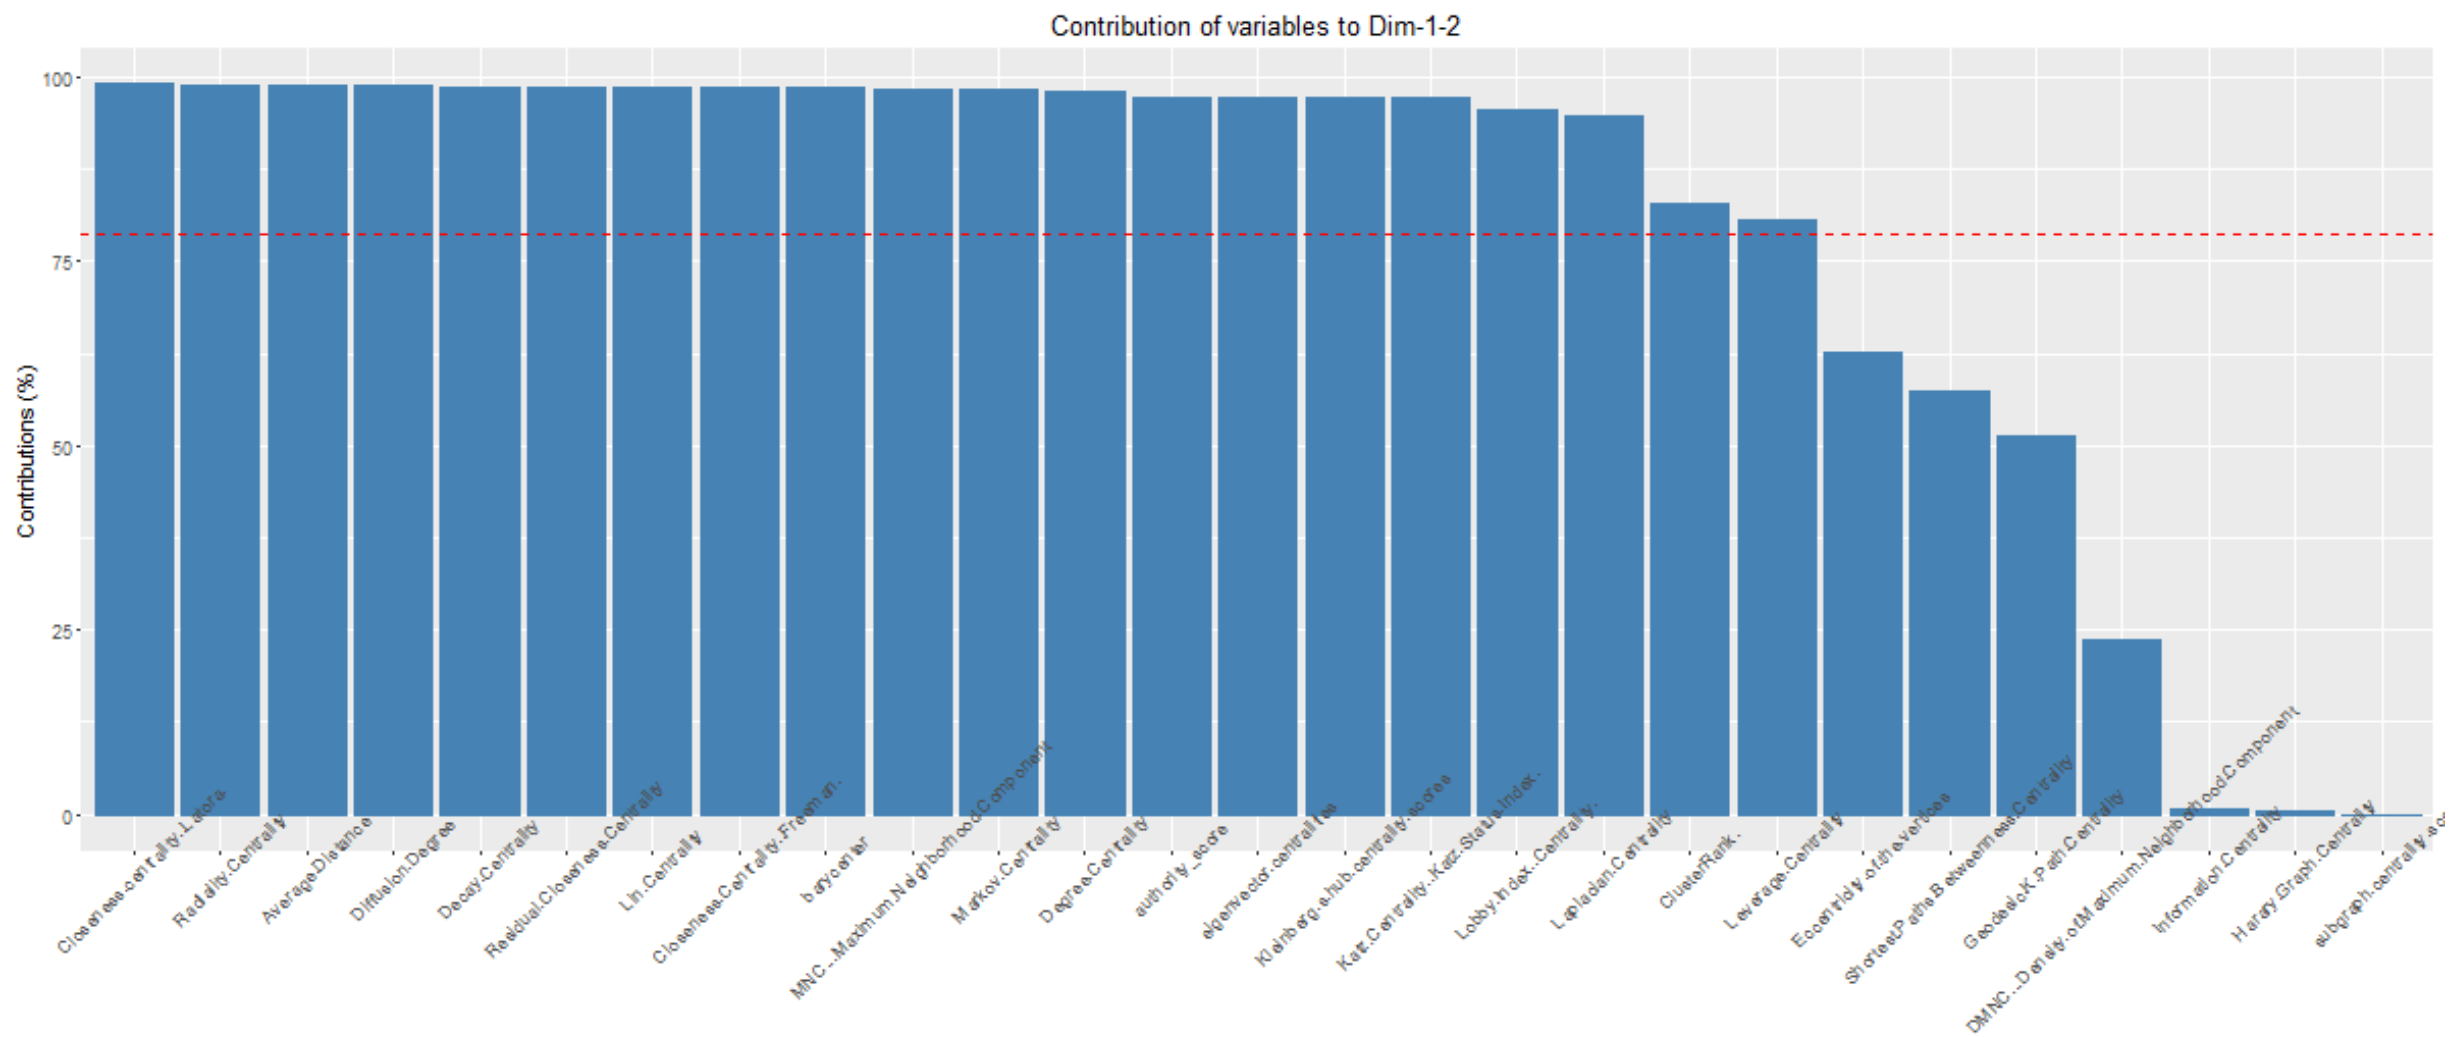

# “Neighborhood\_transferred”

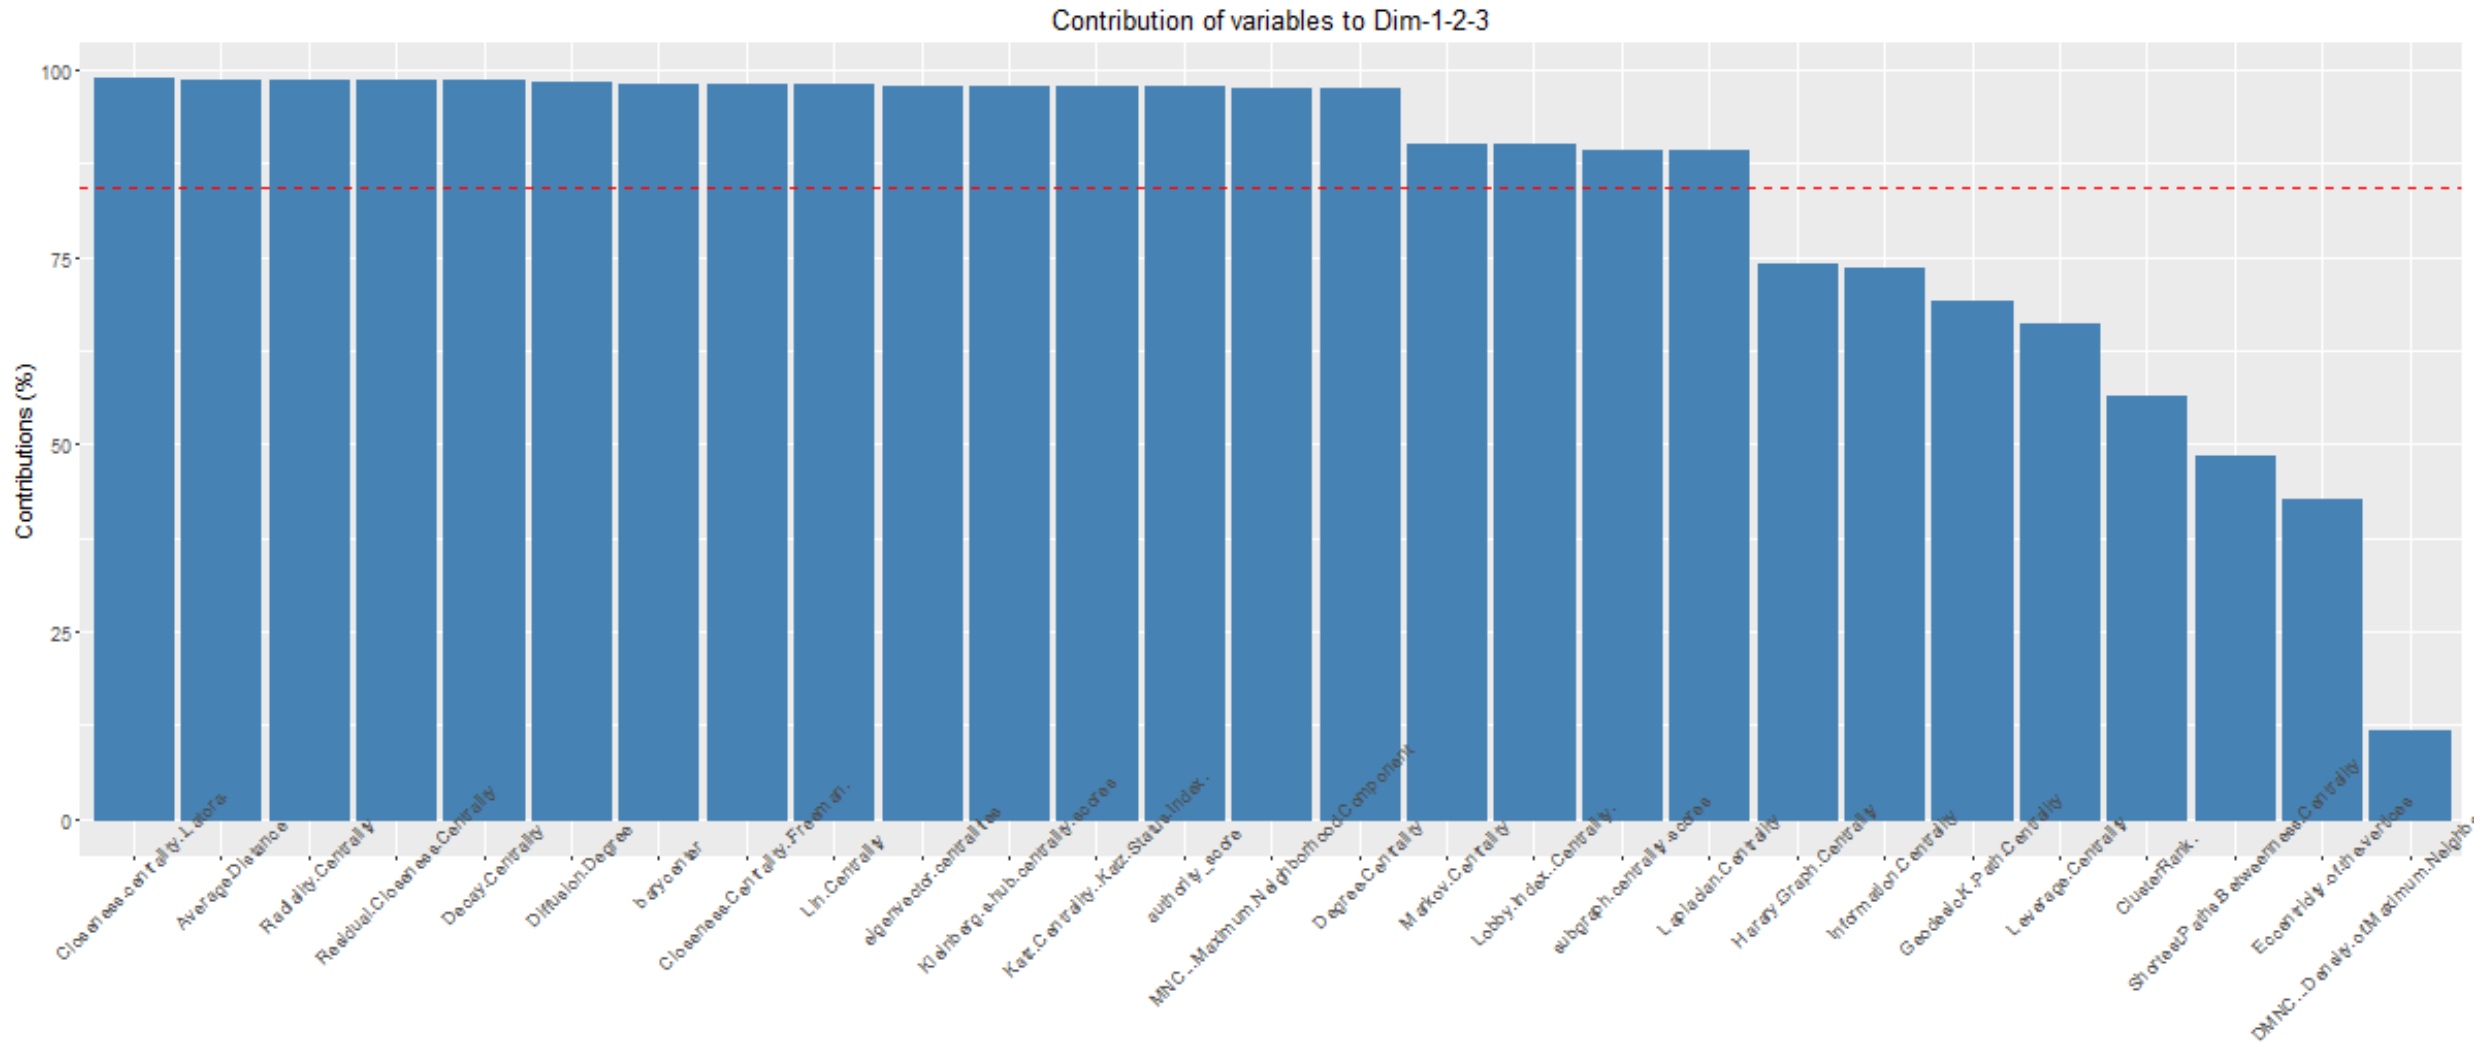

# "Fusion"

Contribution of variables to Dim-1-2-3

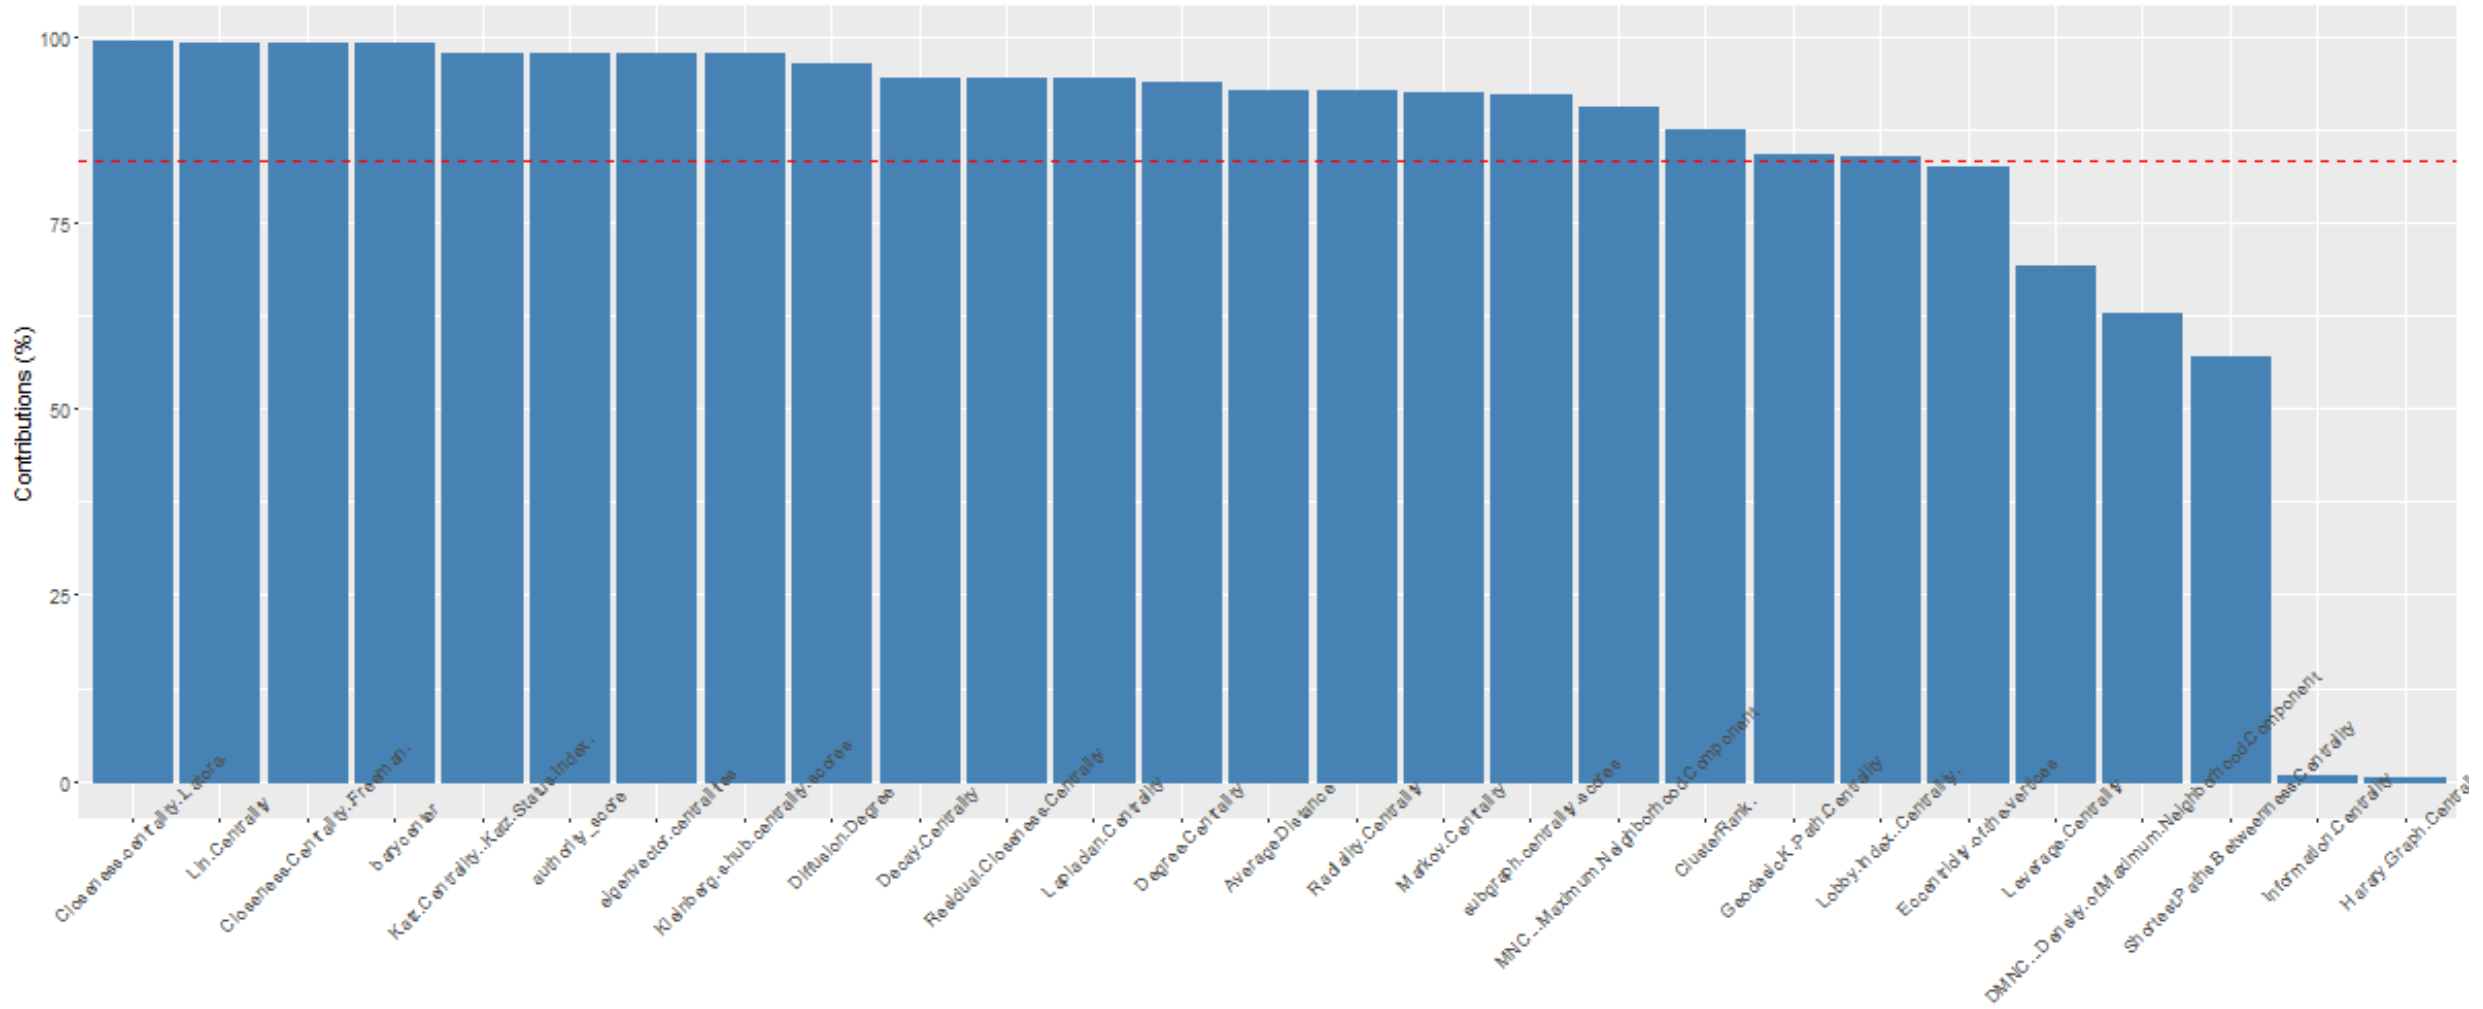

# "Combined\_score"

Contribution of variables to Dim-1-2-3

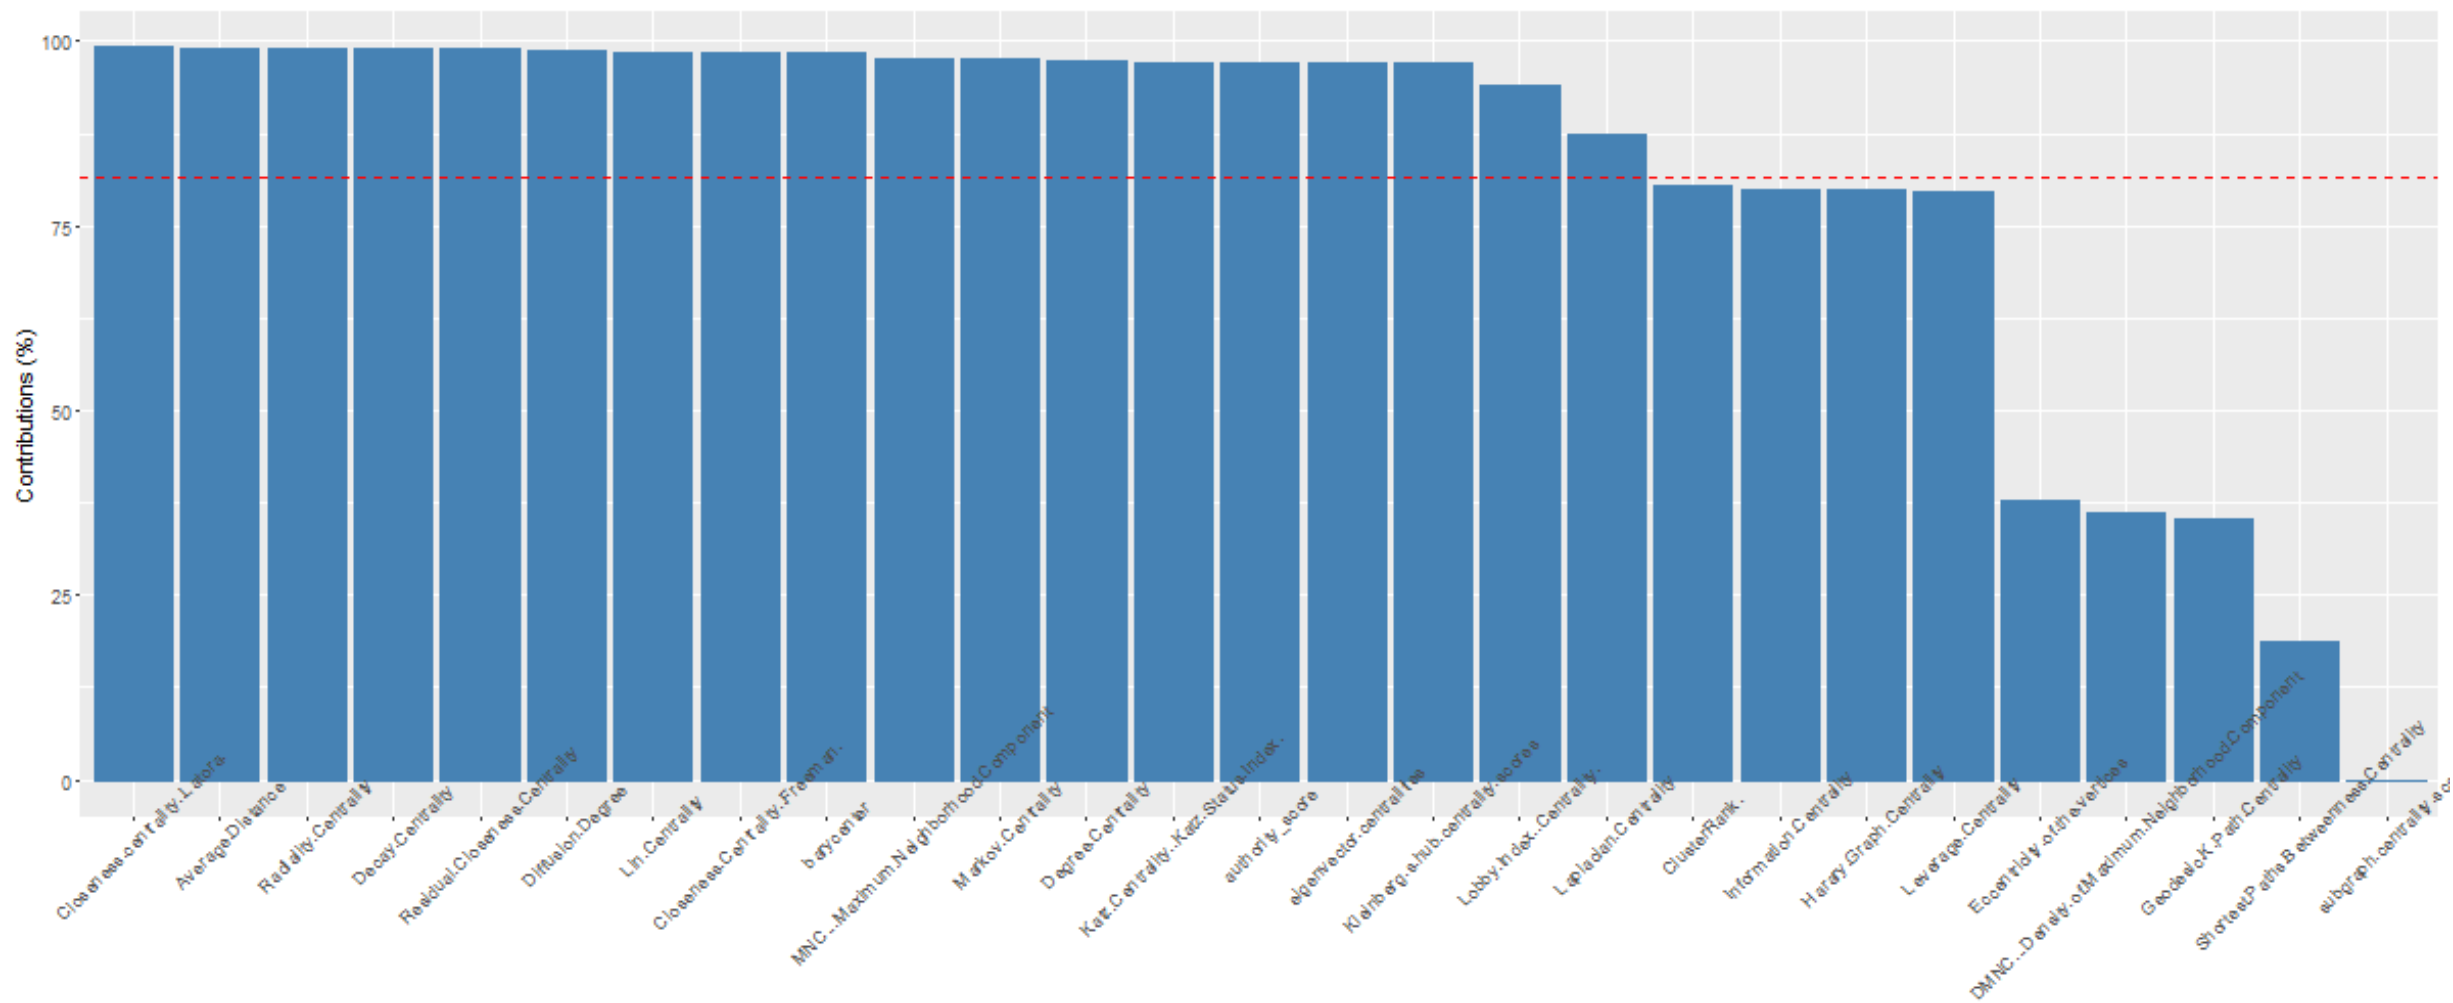

# "Homology"

Contribution of variables to Dim-1

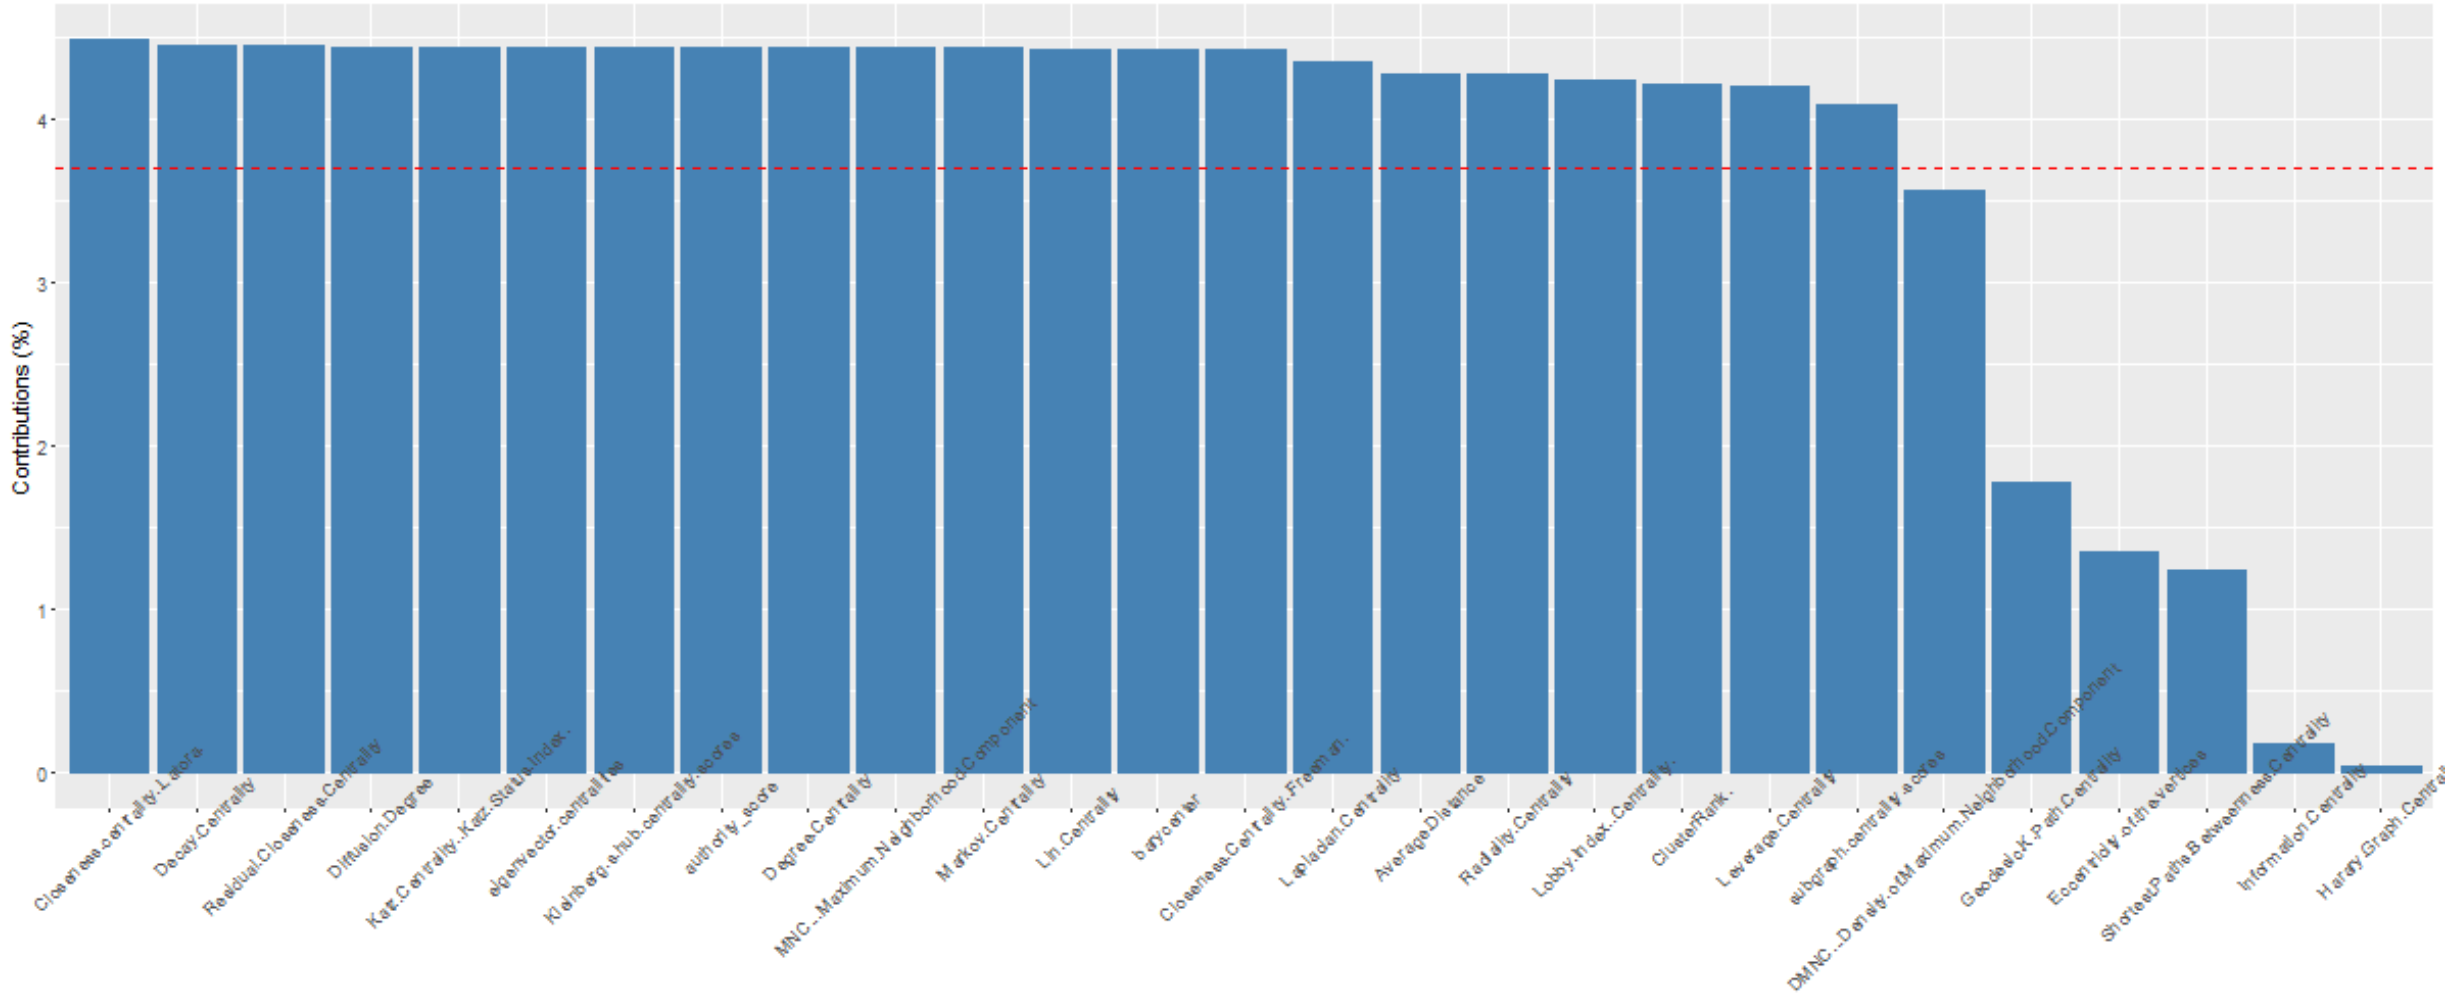

# “Erdős–Rényi”

Contribution of variables to Dim-1

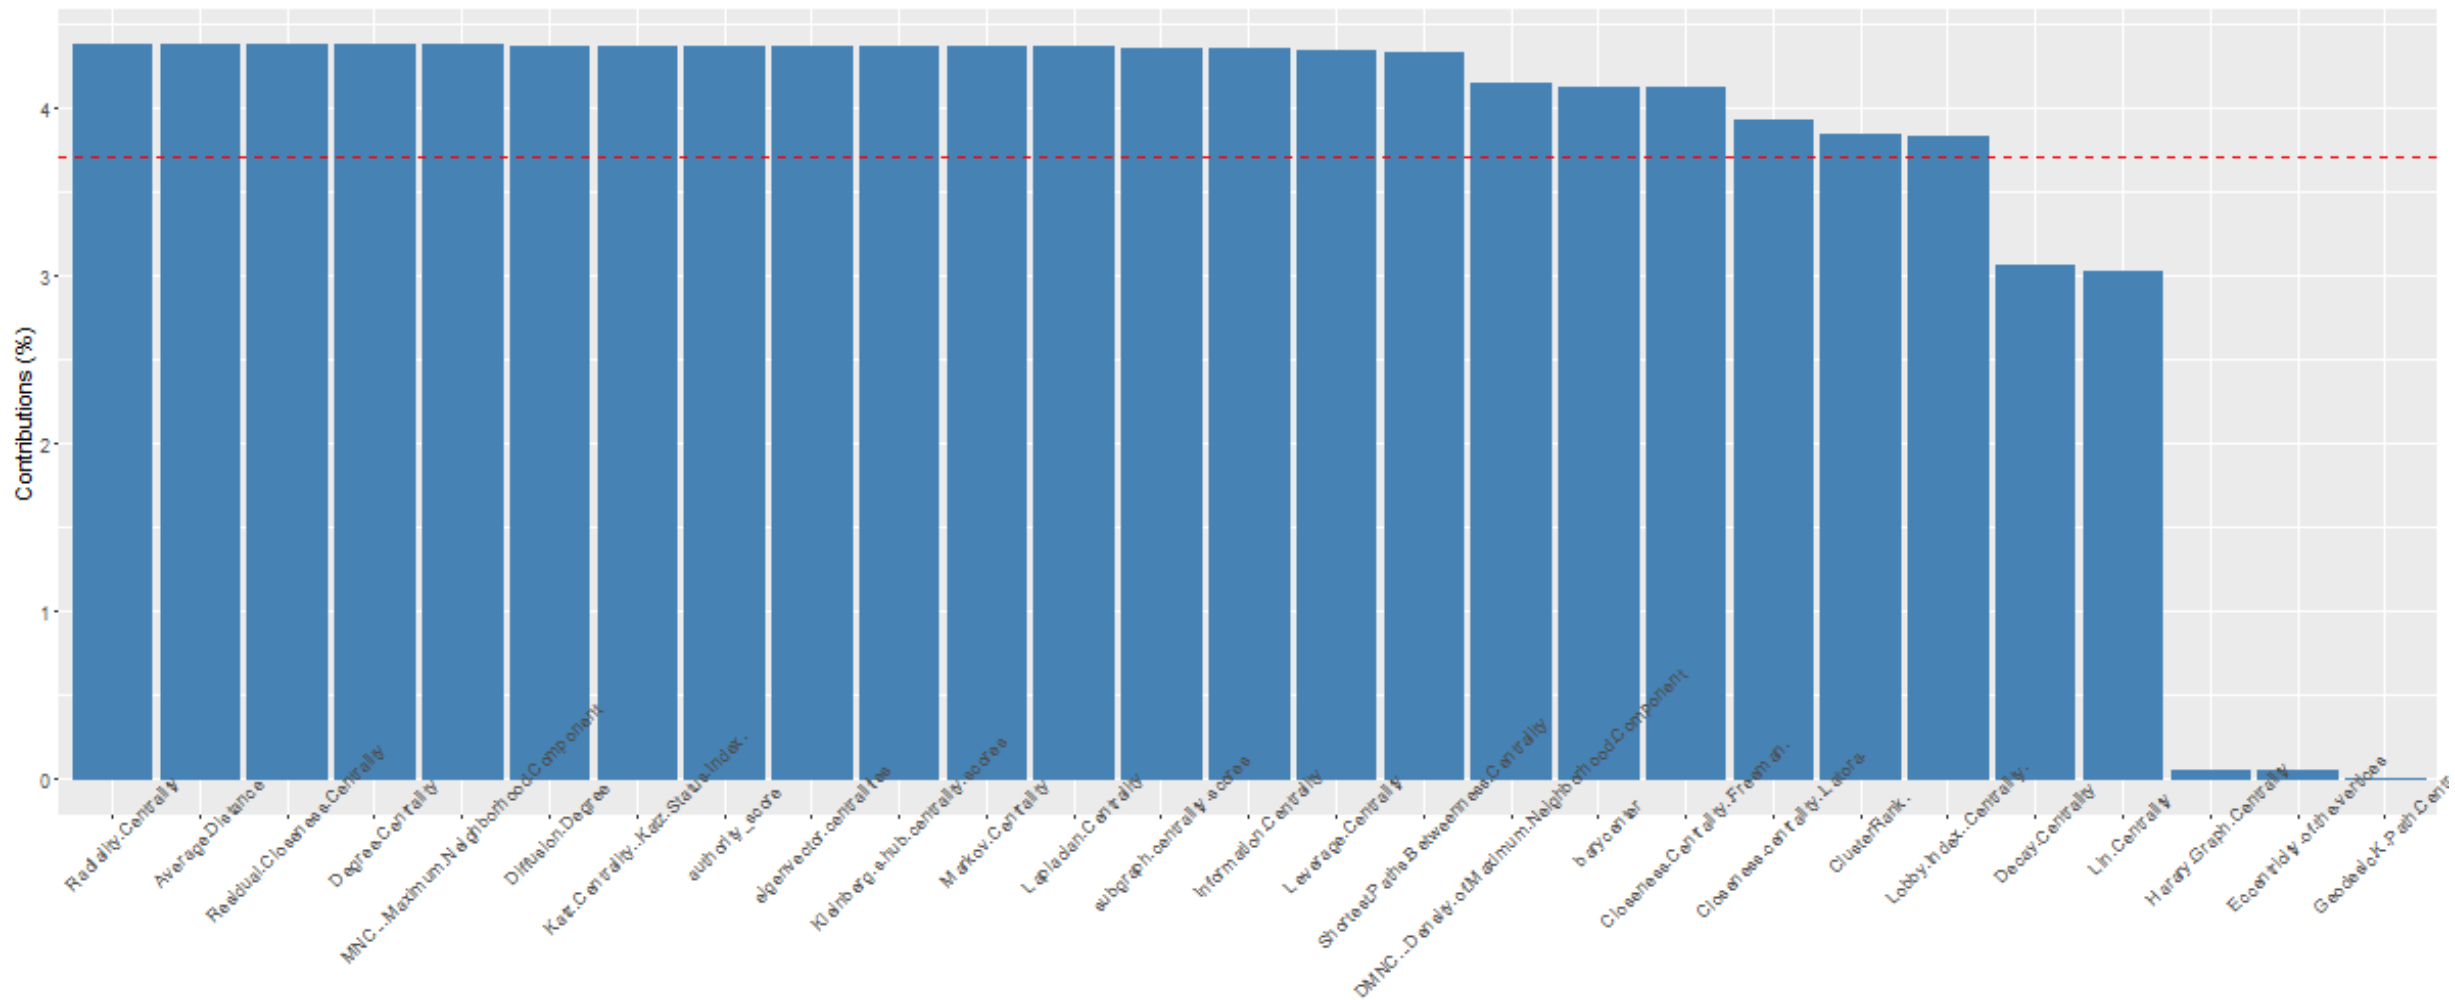

Supplement: 12918_2018_598_MOESM4_ESM.pdf [file 12918_2018_598_MOESM4_ESM.pdf]
