# Supplementary material for: A systematic survey of centrality measures for protein-protein interaction networks
Source: Springer Nature journal article supplement (doi:10.1186/s12918-018-0598-2), 2018-07-31

# “Coexpression”

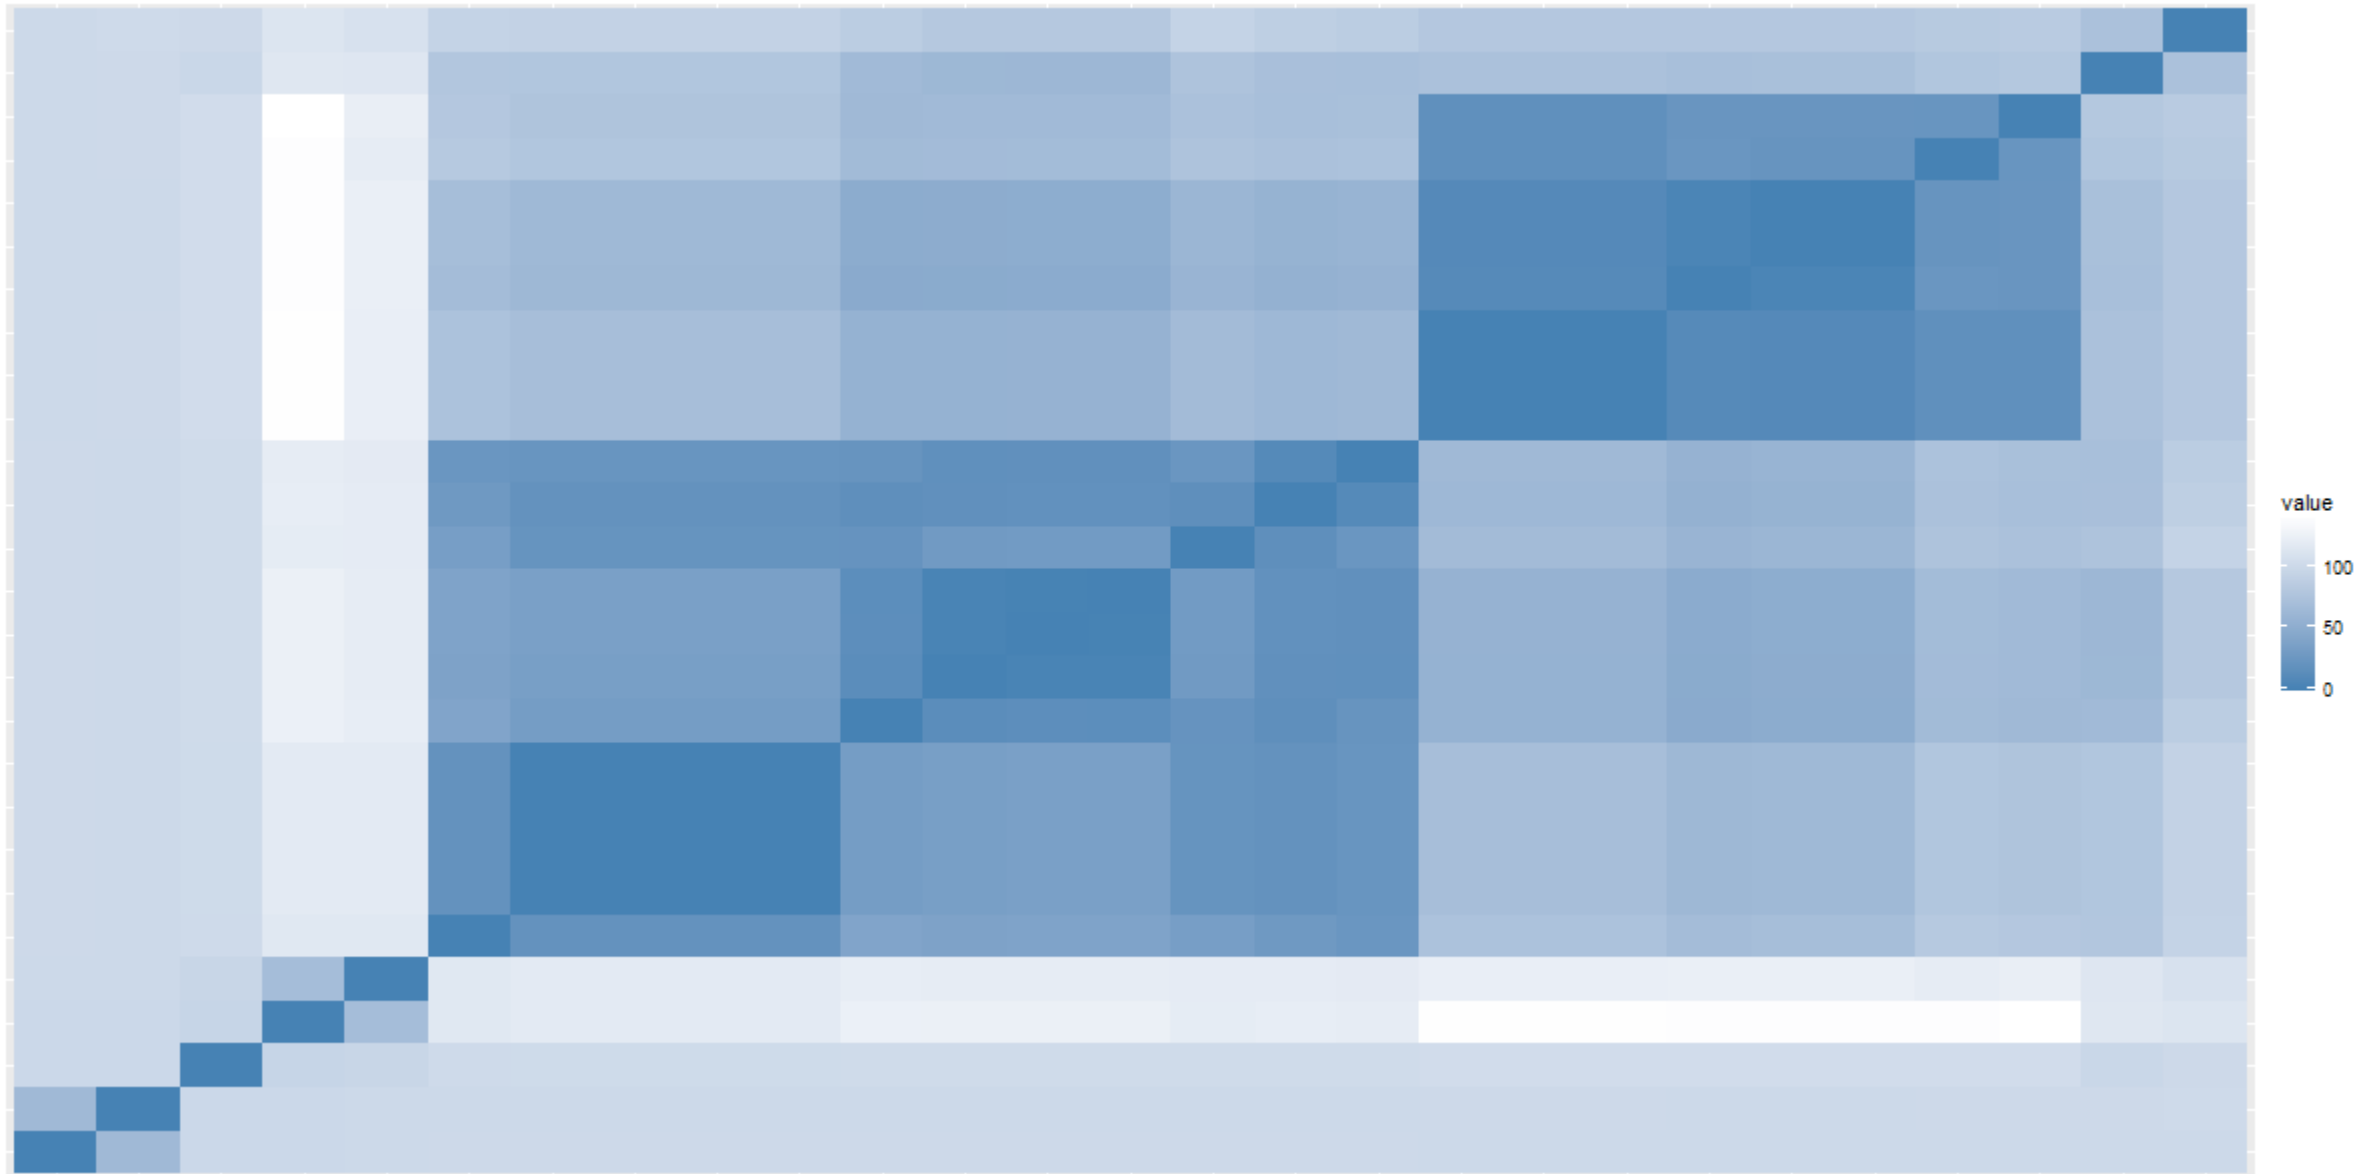



# "Cooccurrence"

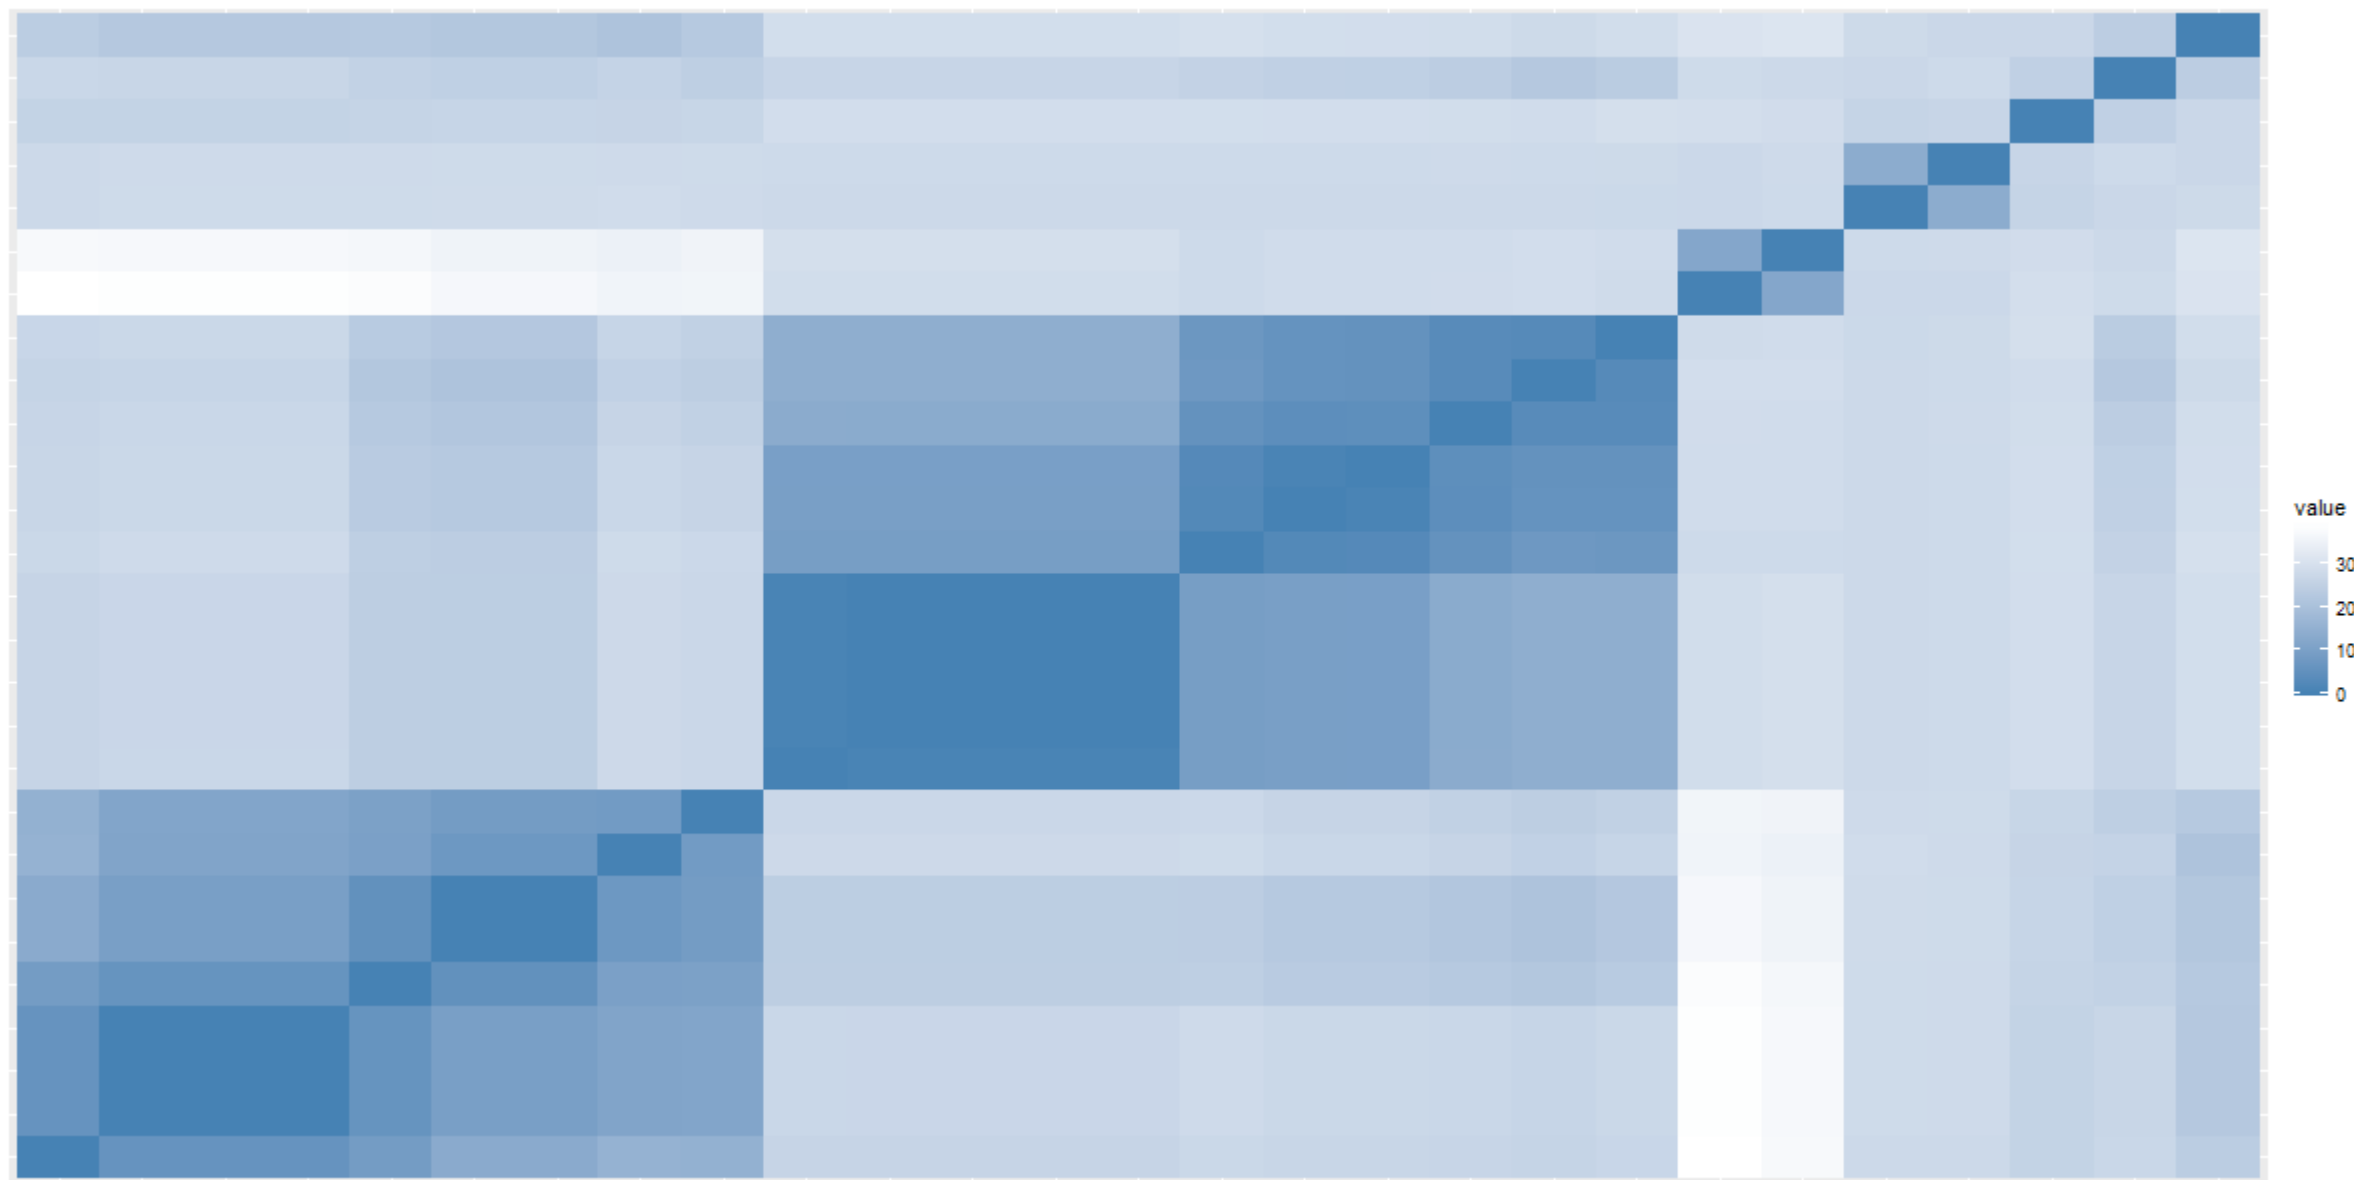

# "Database"

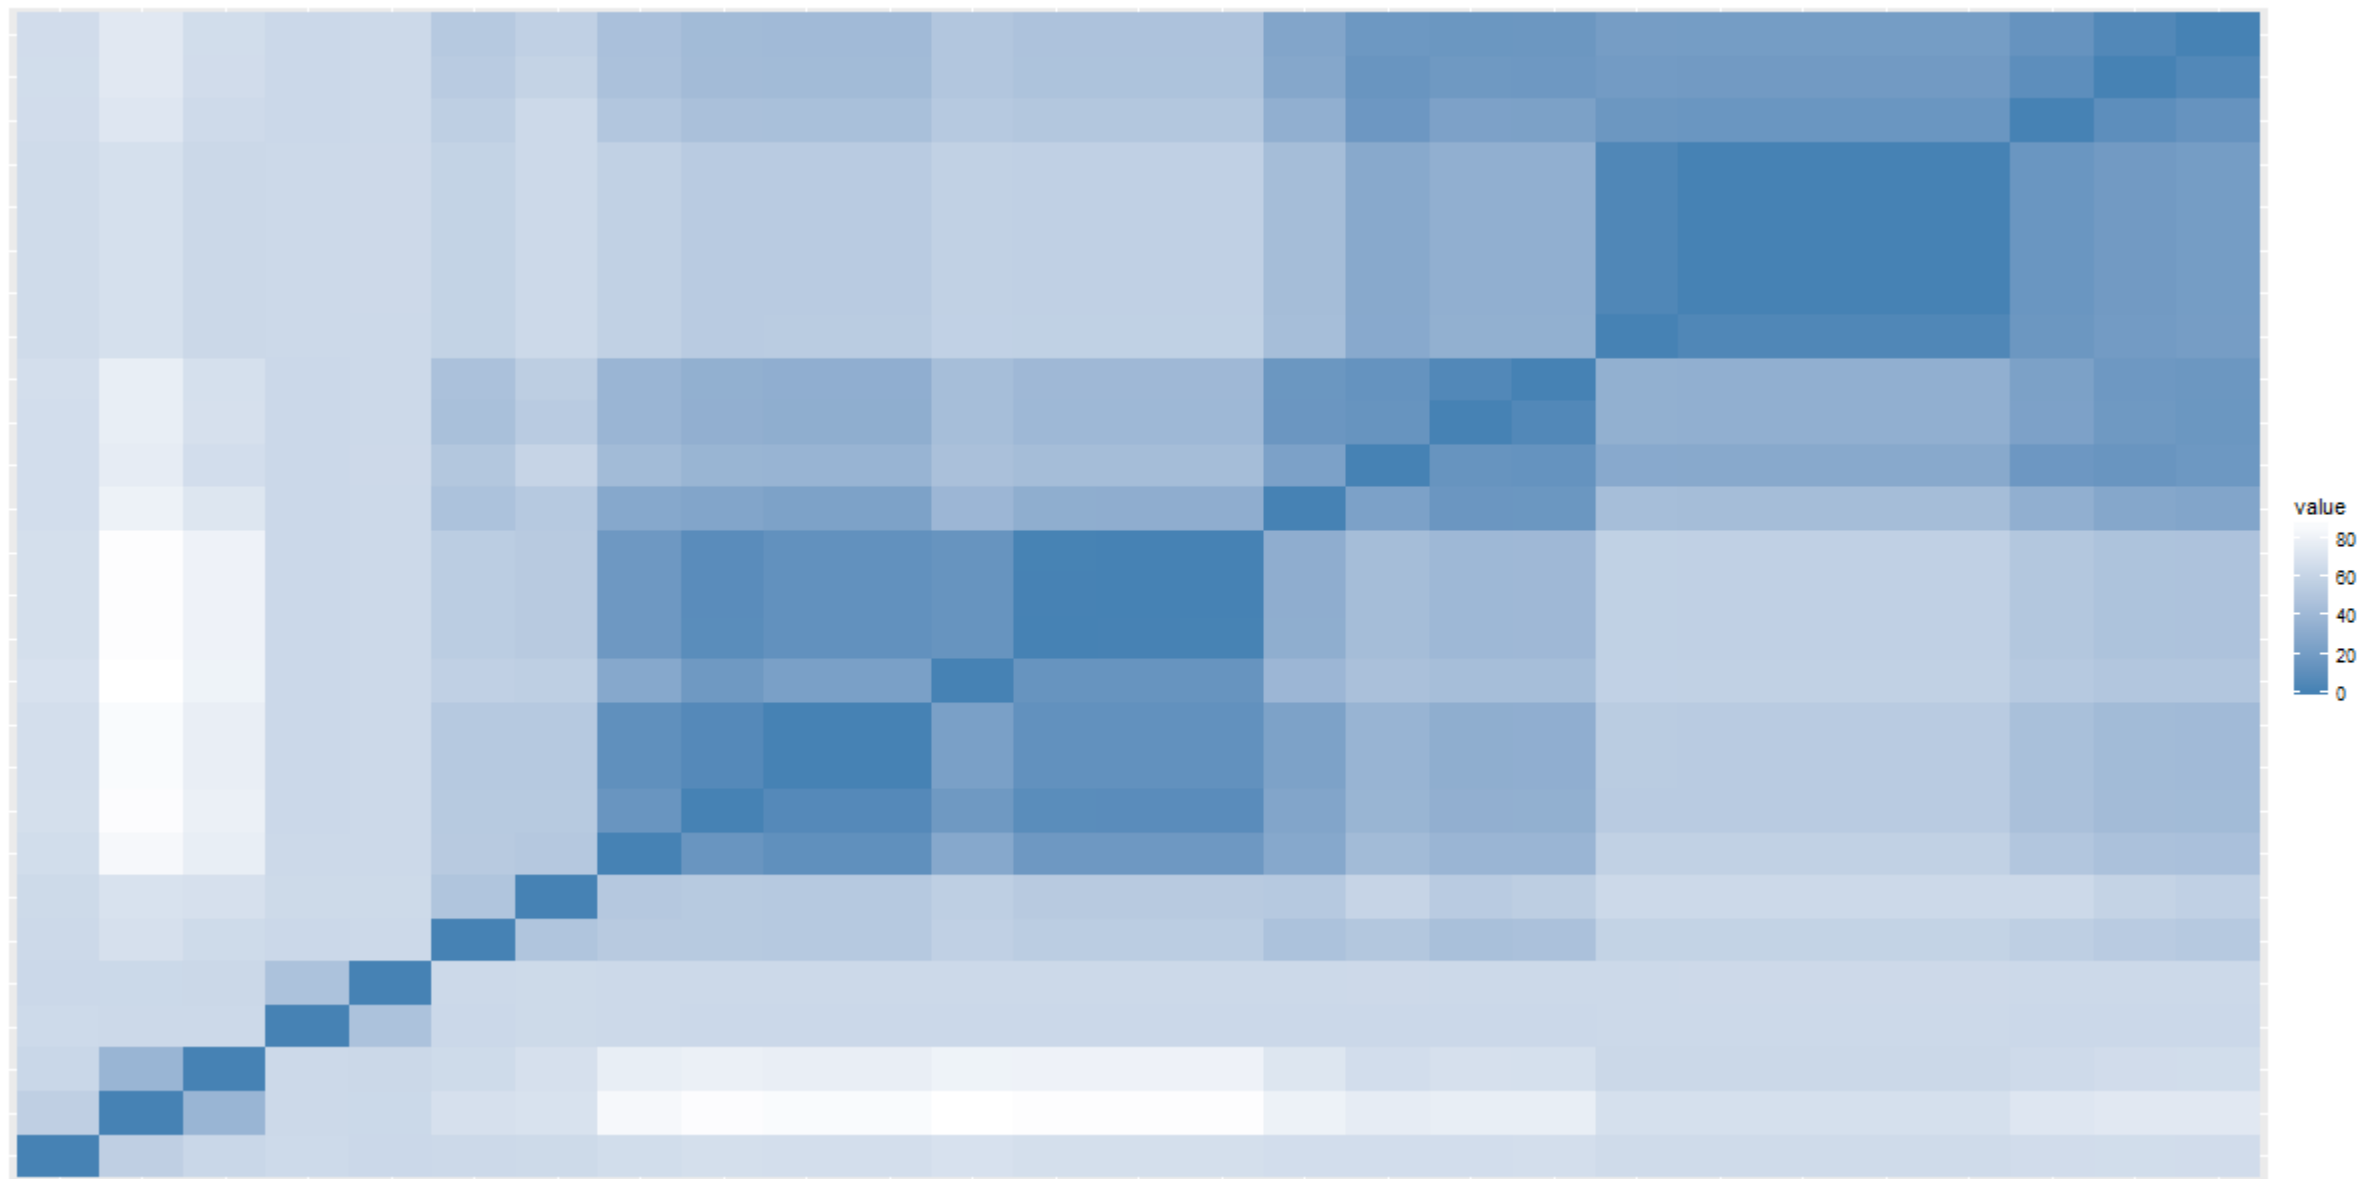

“Database\_transferred”

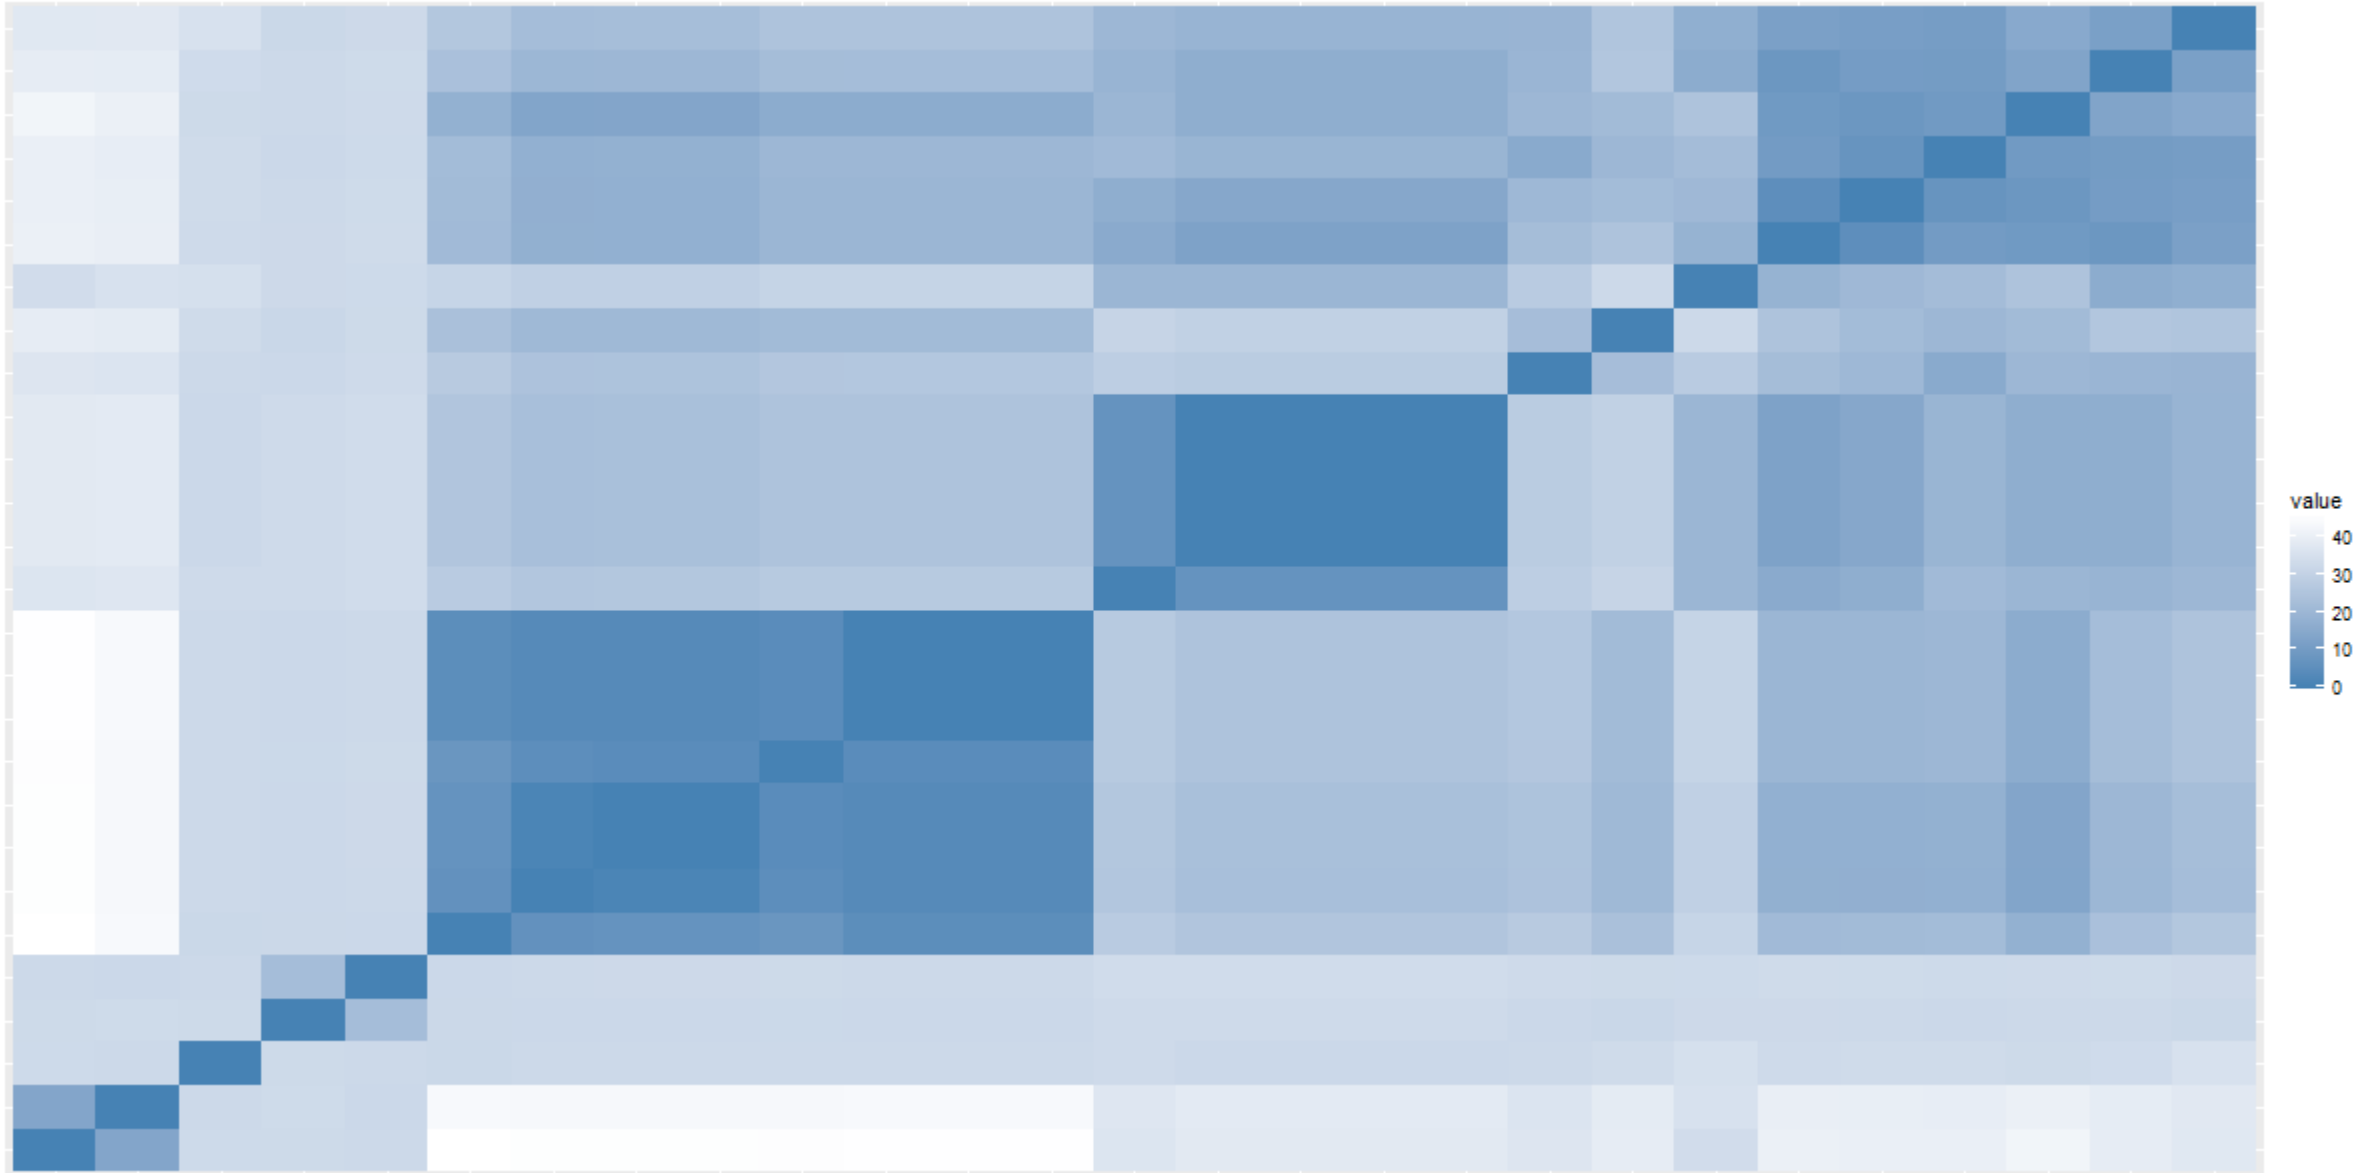

# "Experiments"

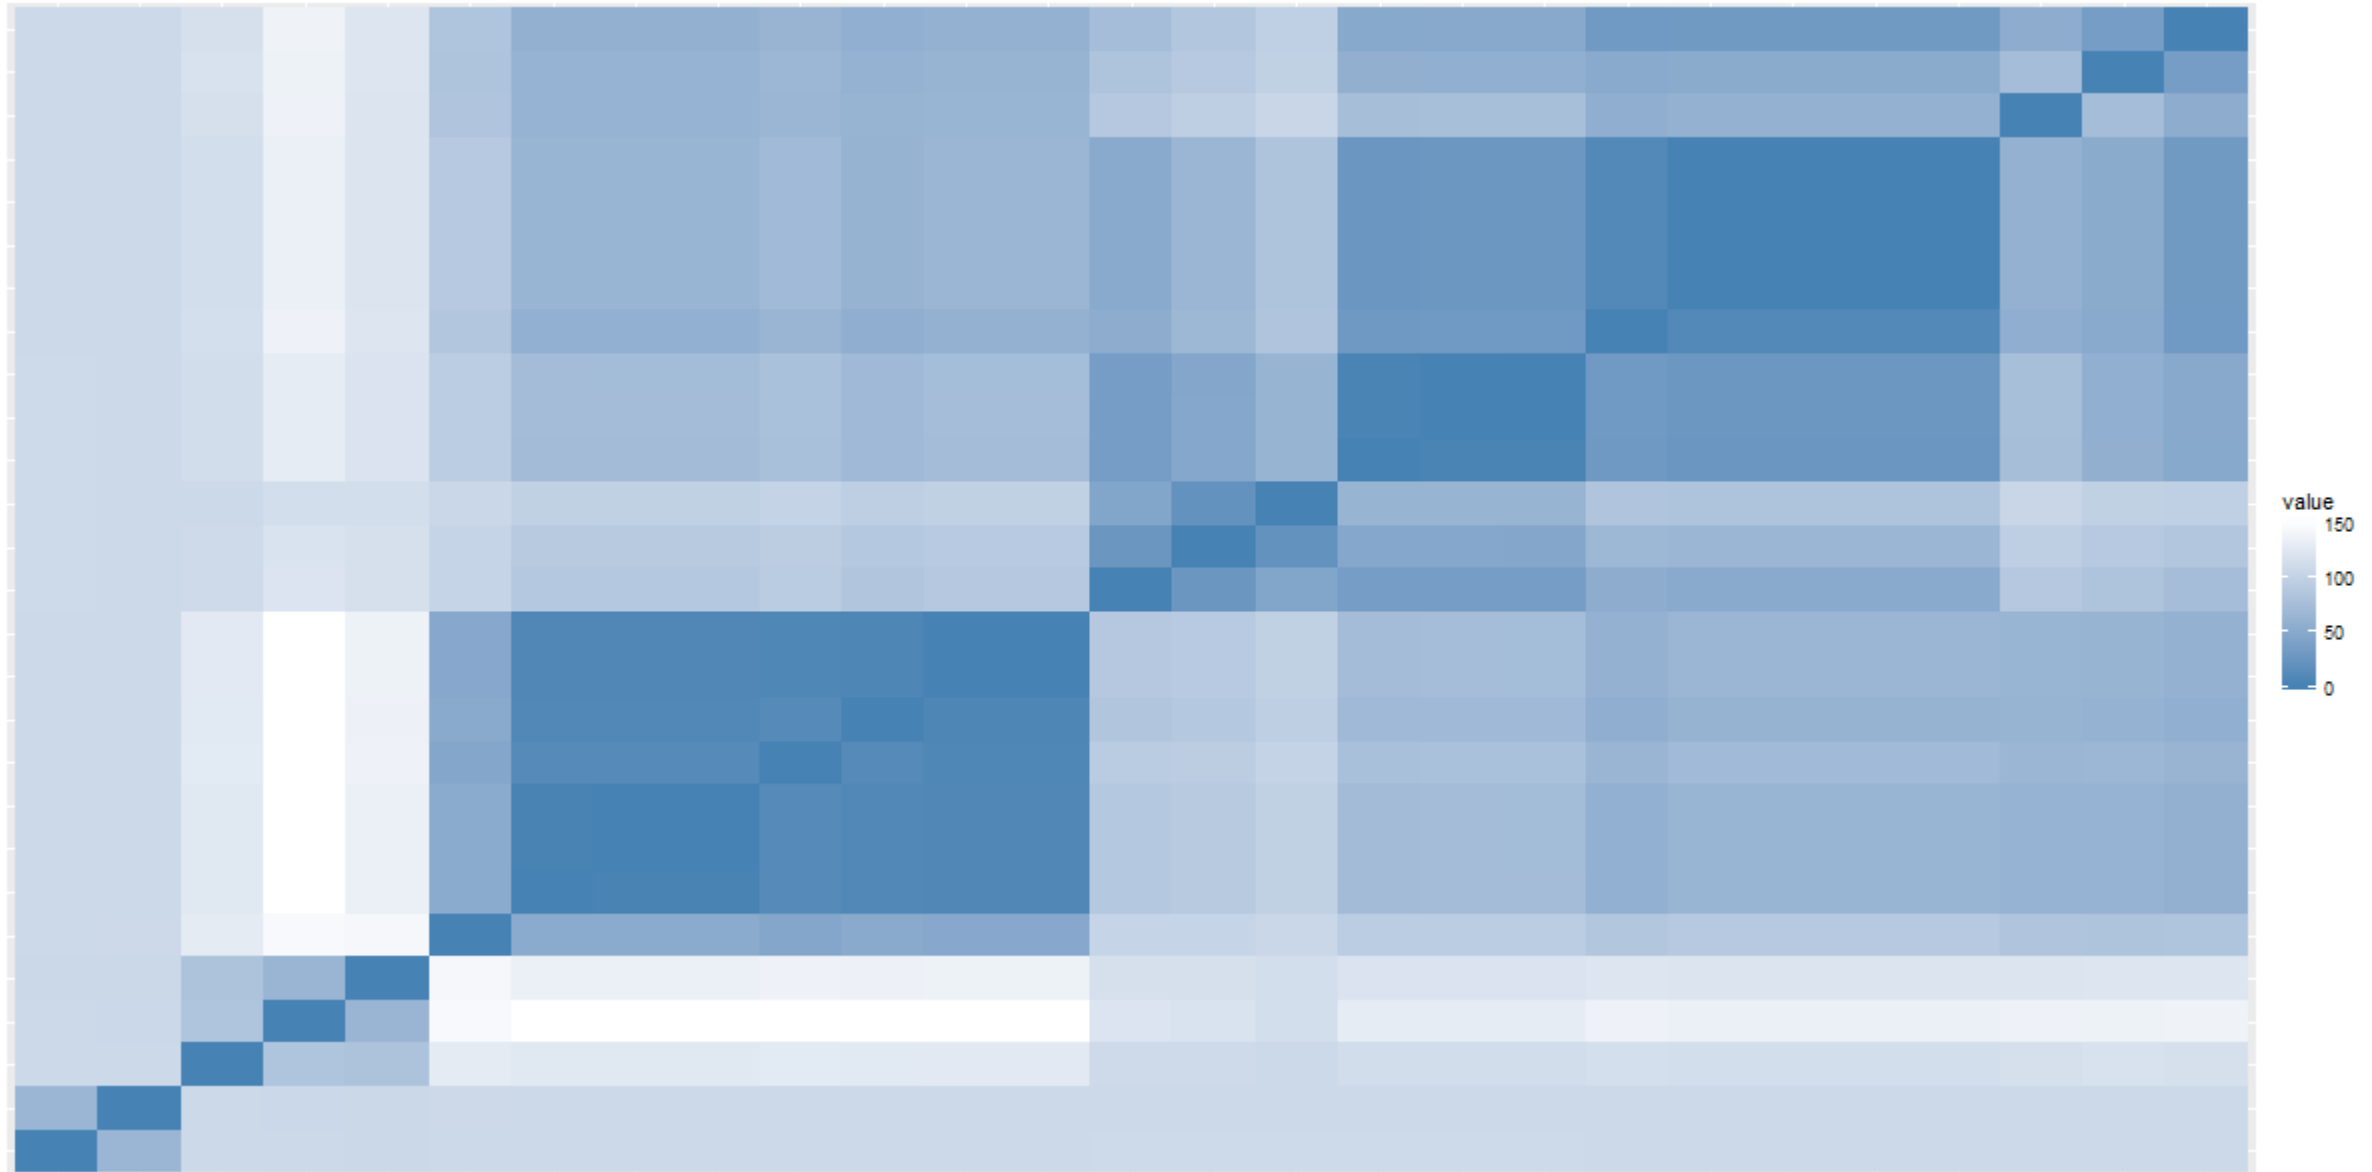

“Experiments\_transferred”

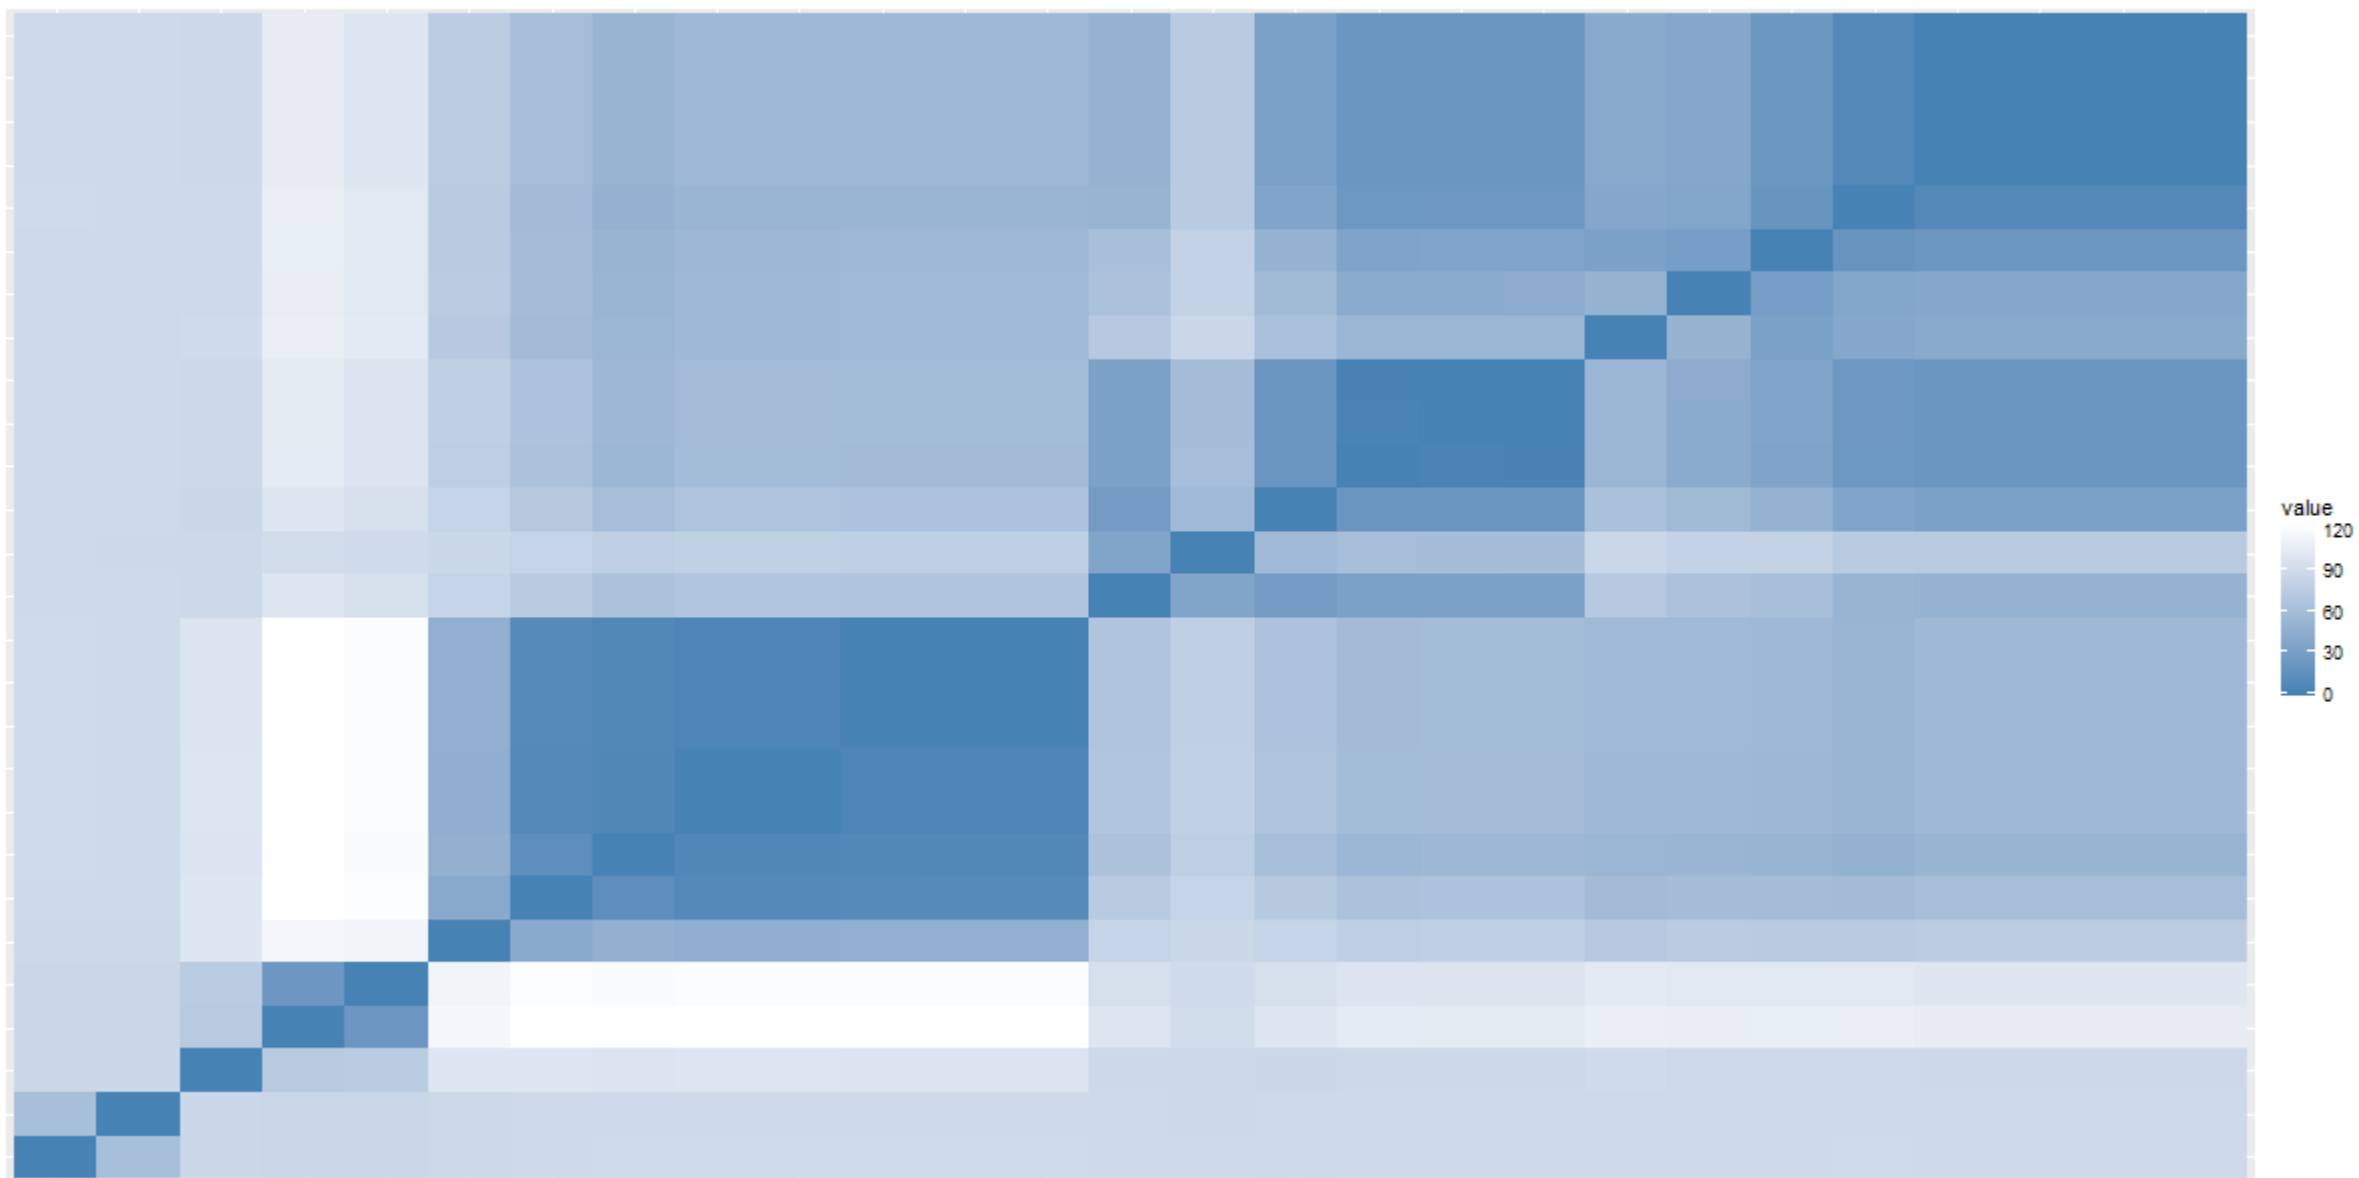

# "Textmining"

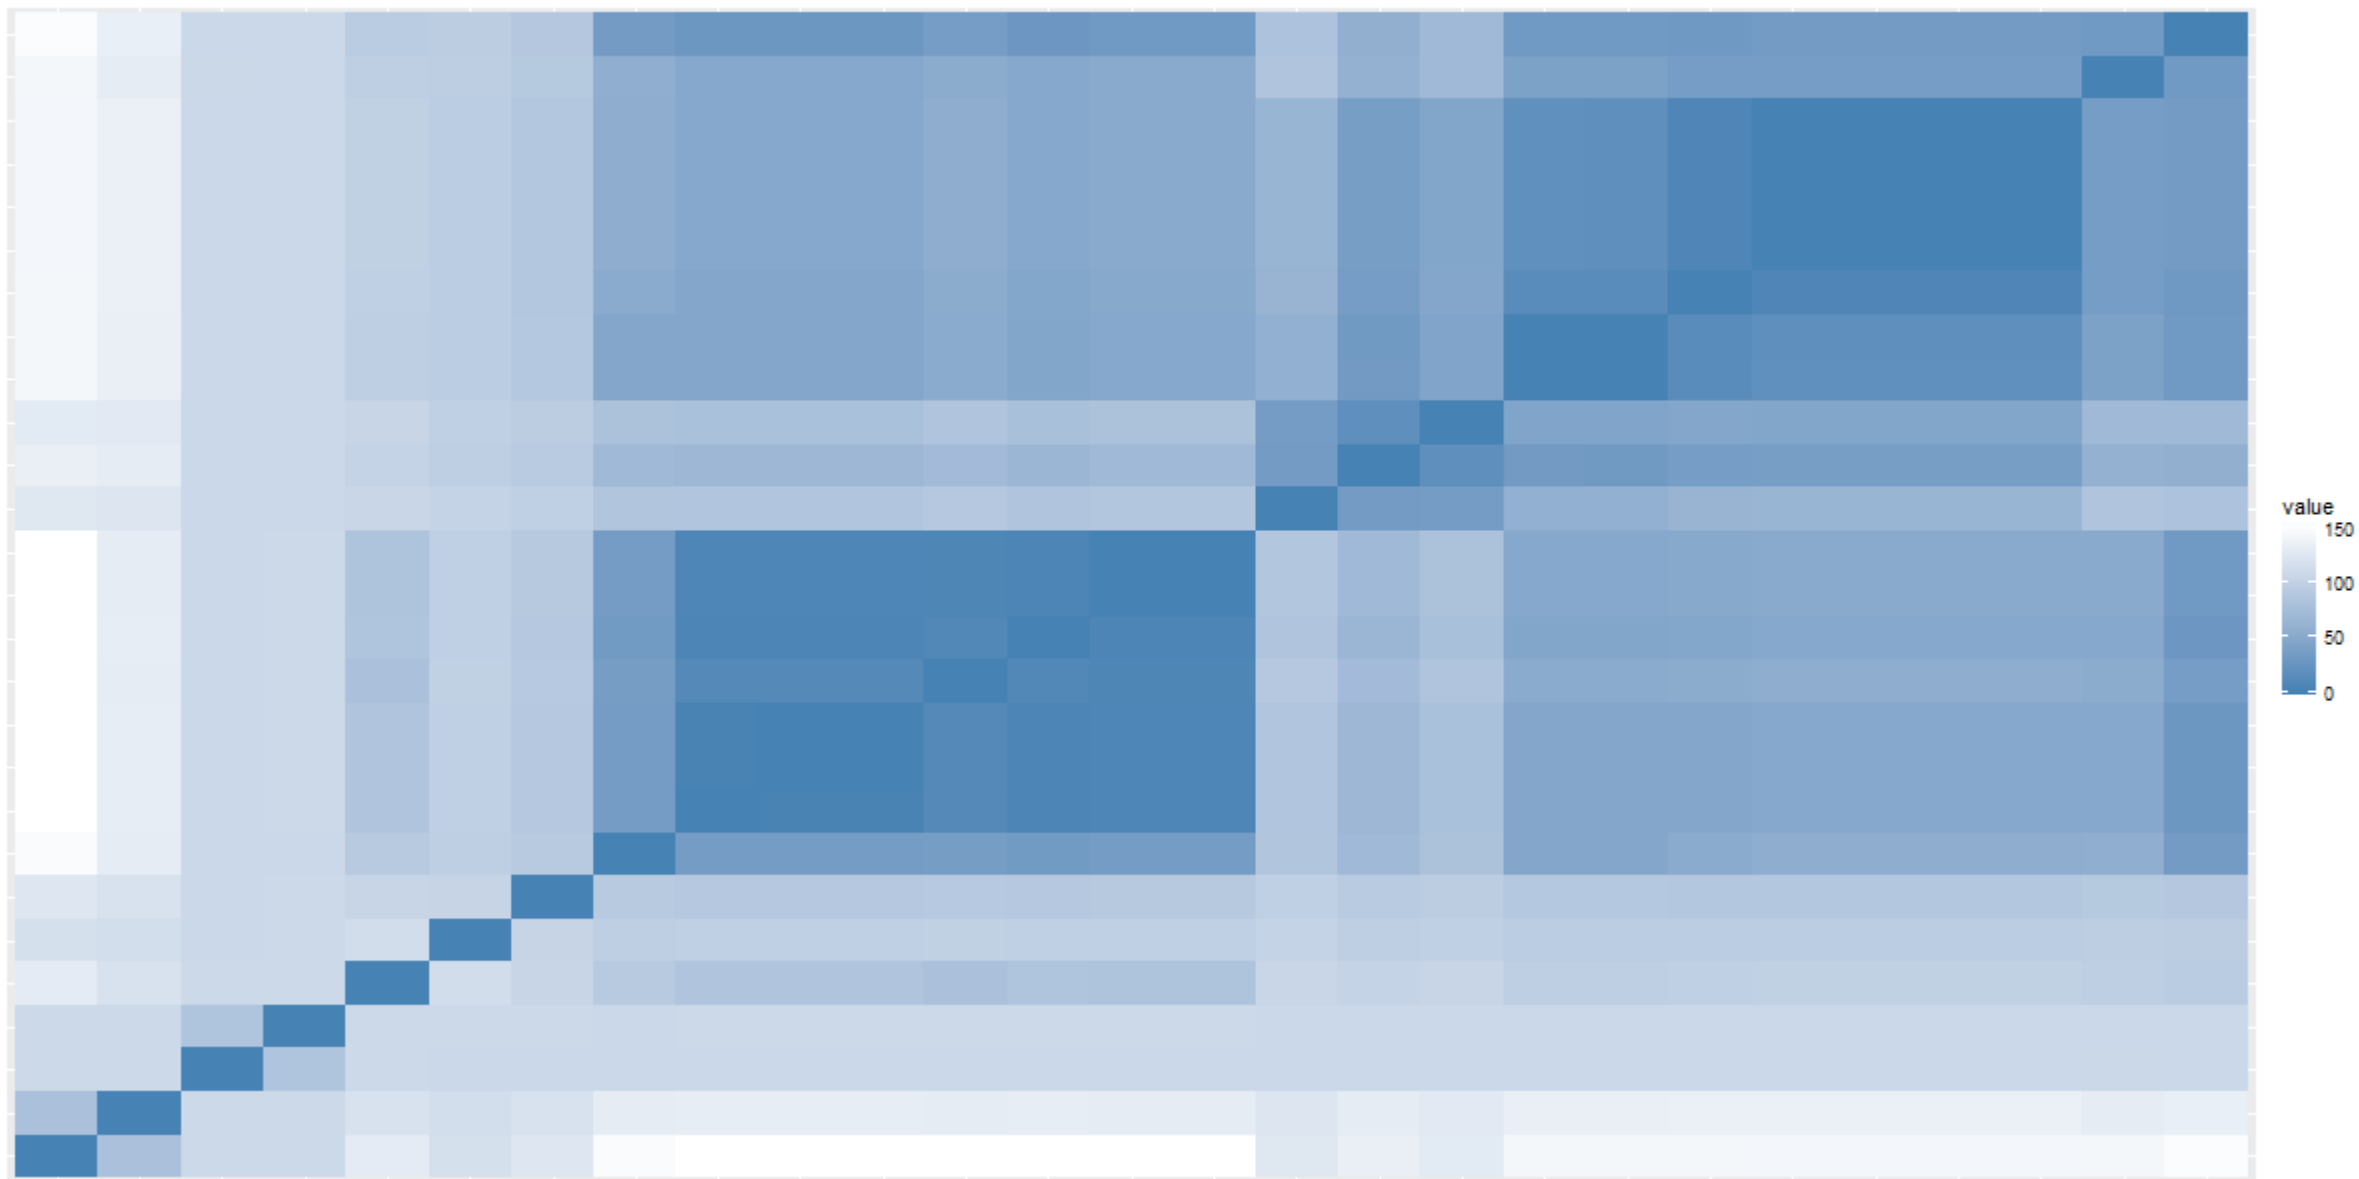



# "Textmining\_transferred"

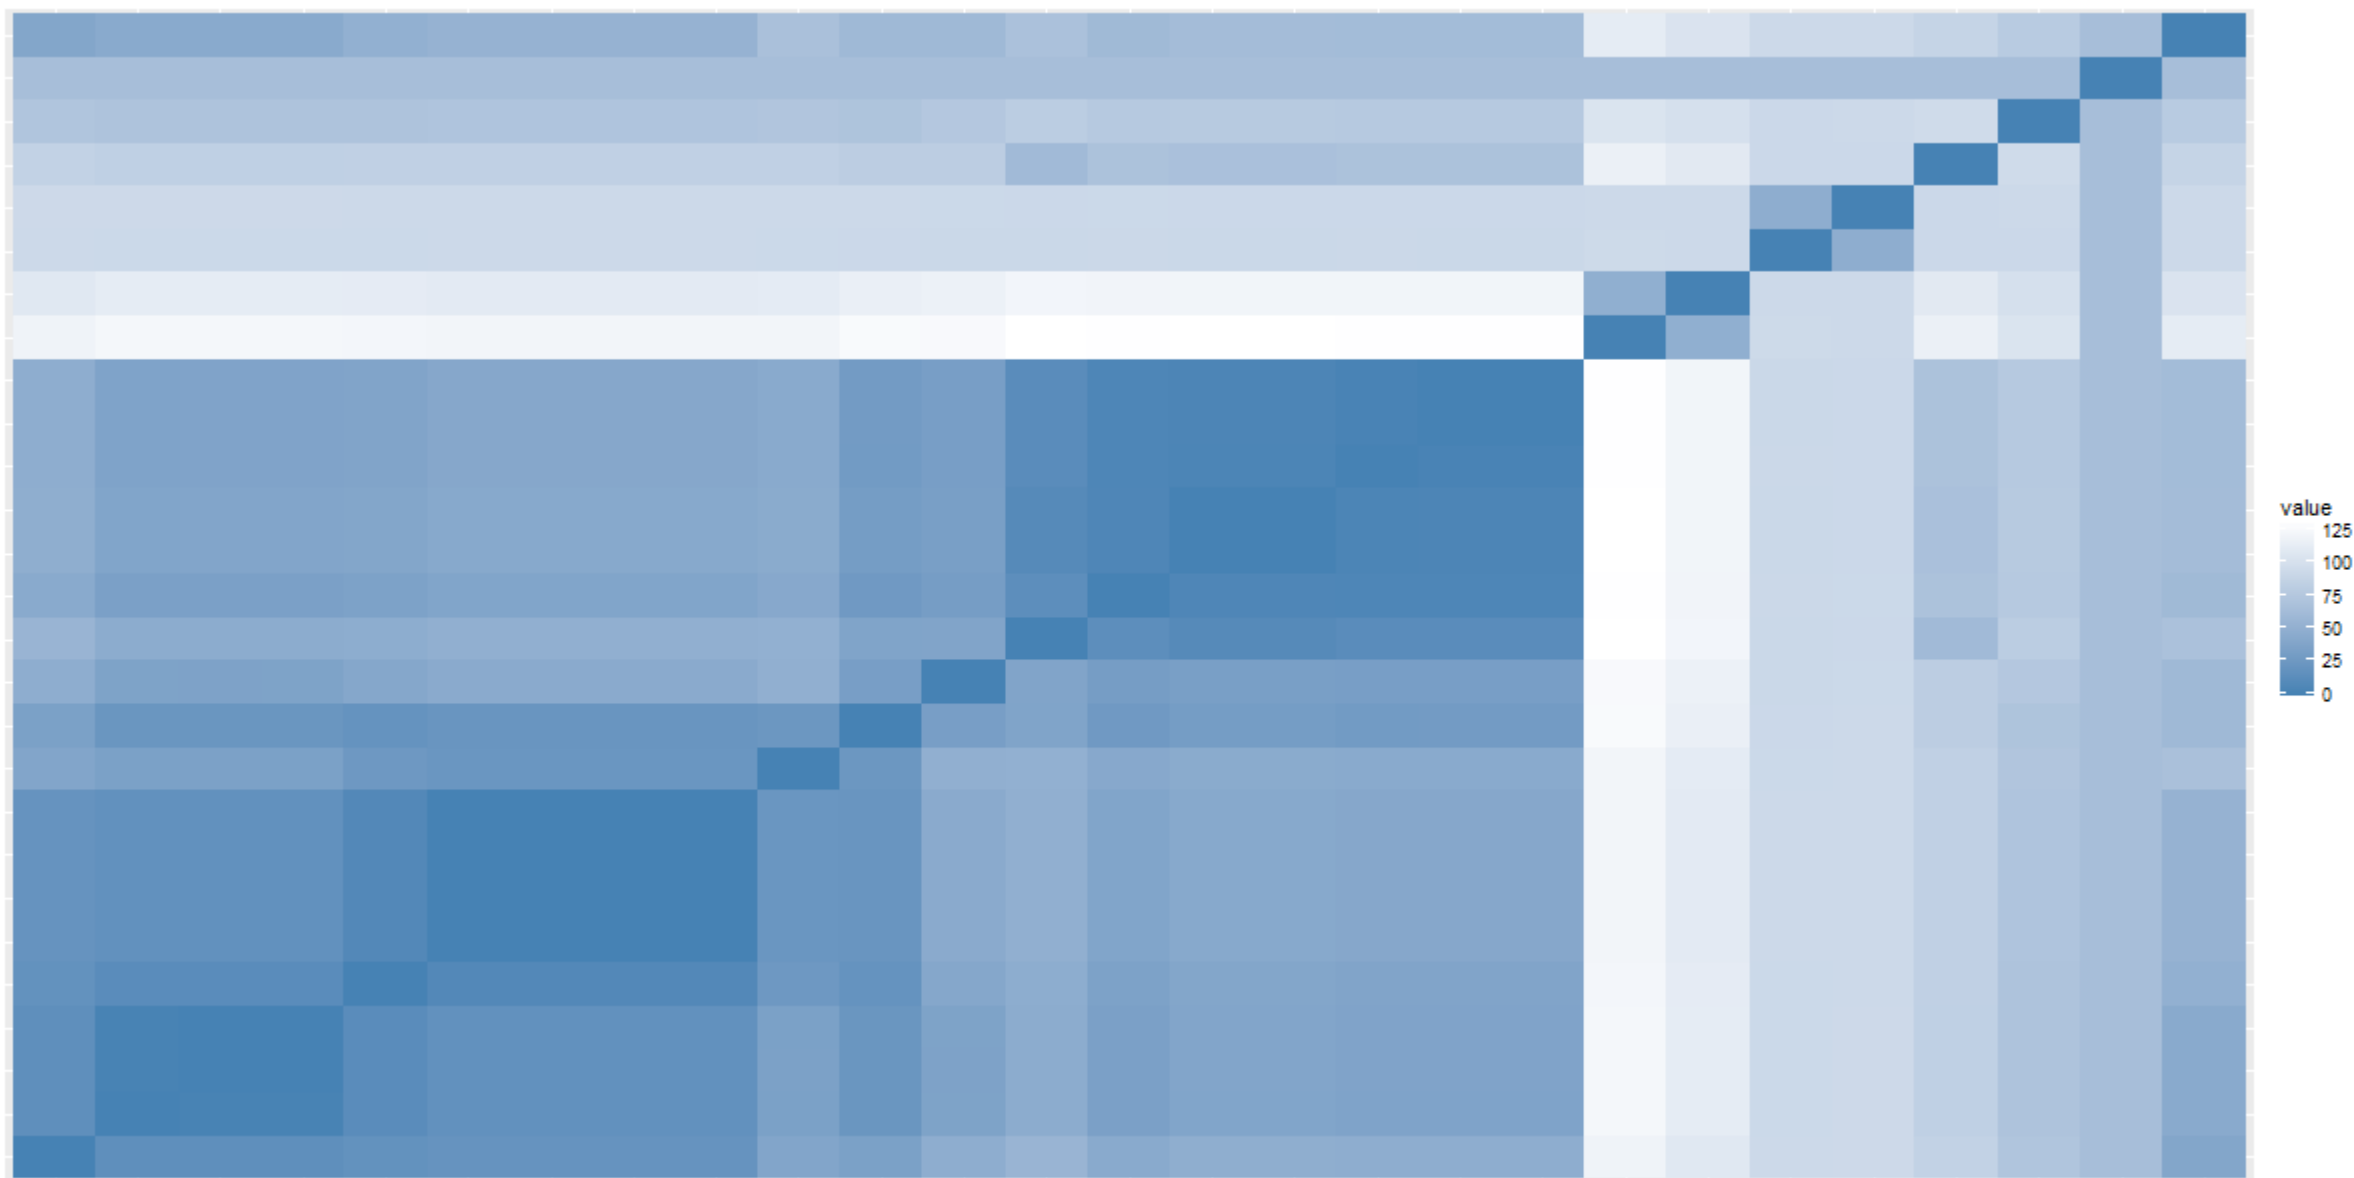

# "Neighborhood\_transferred"

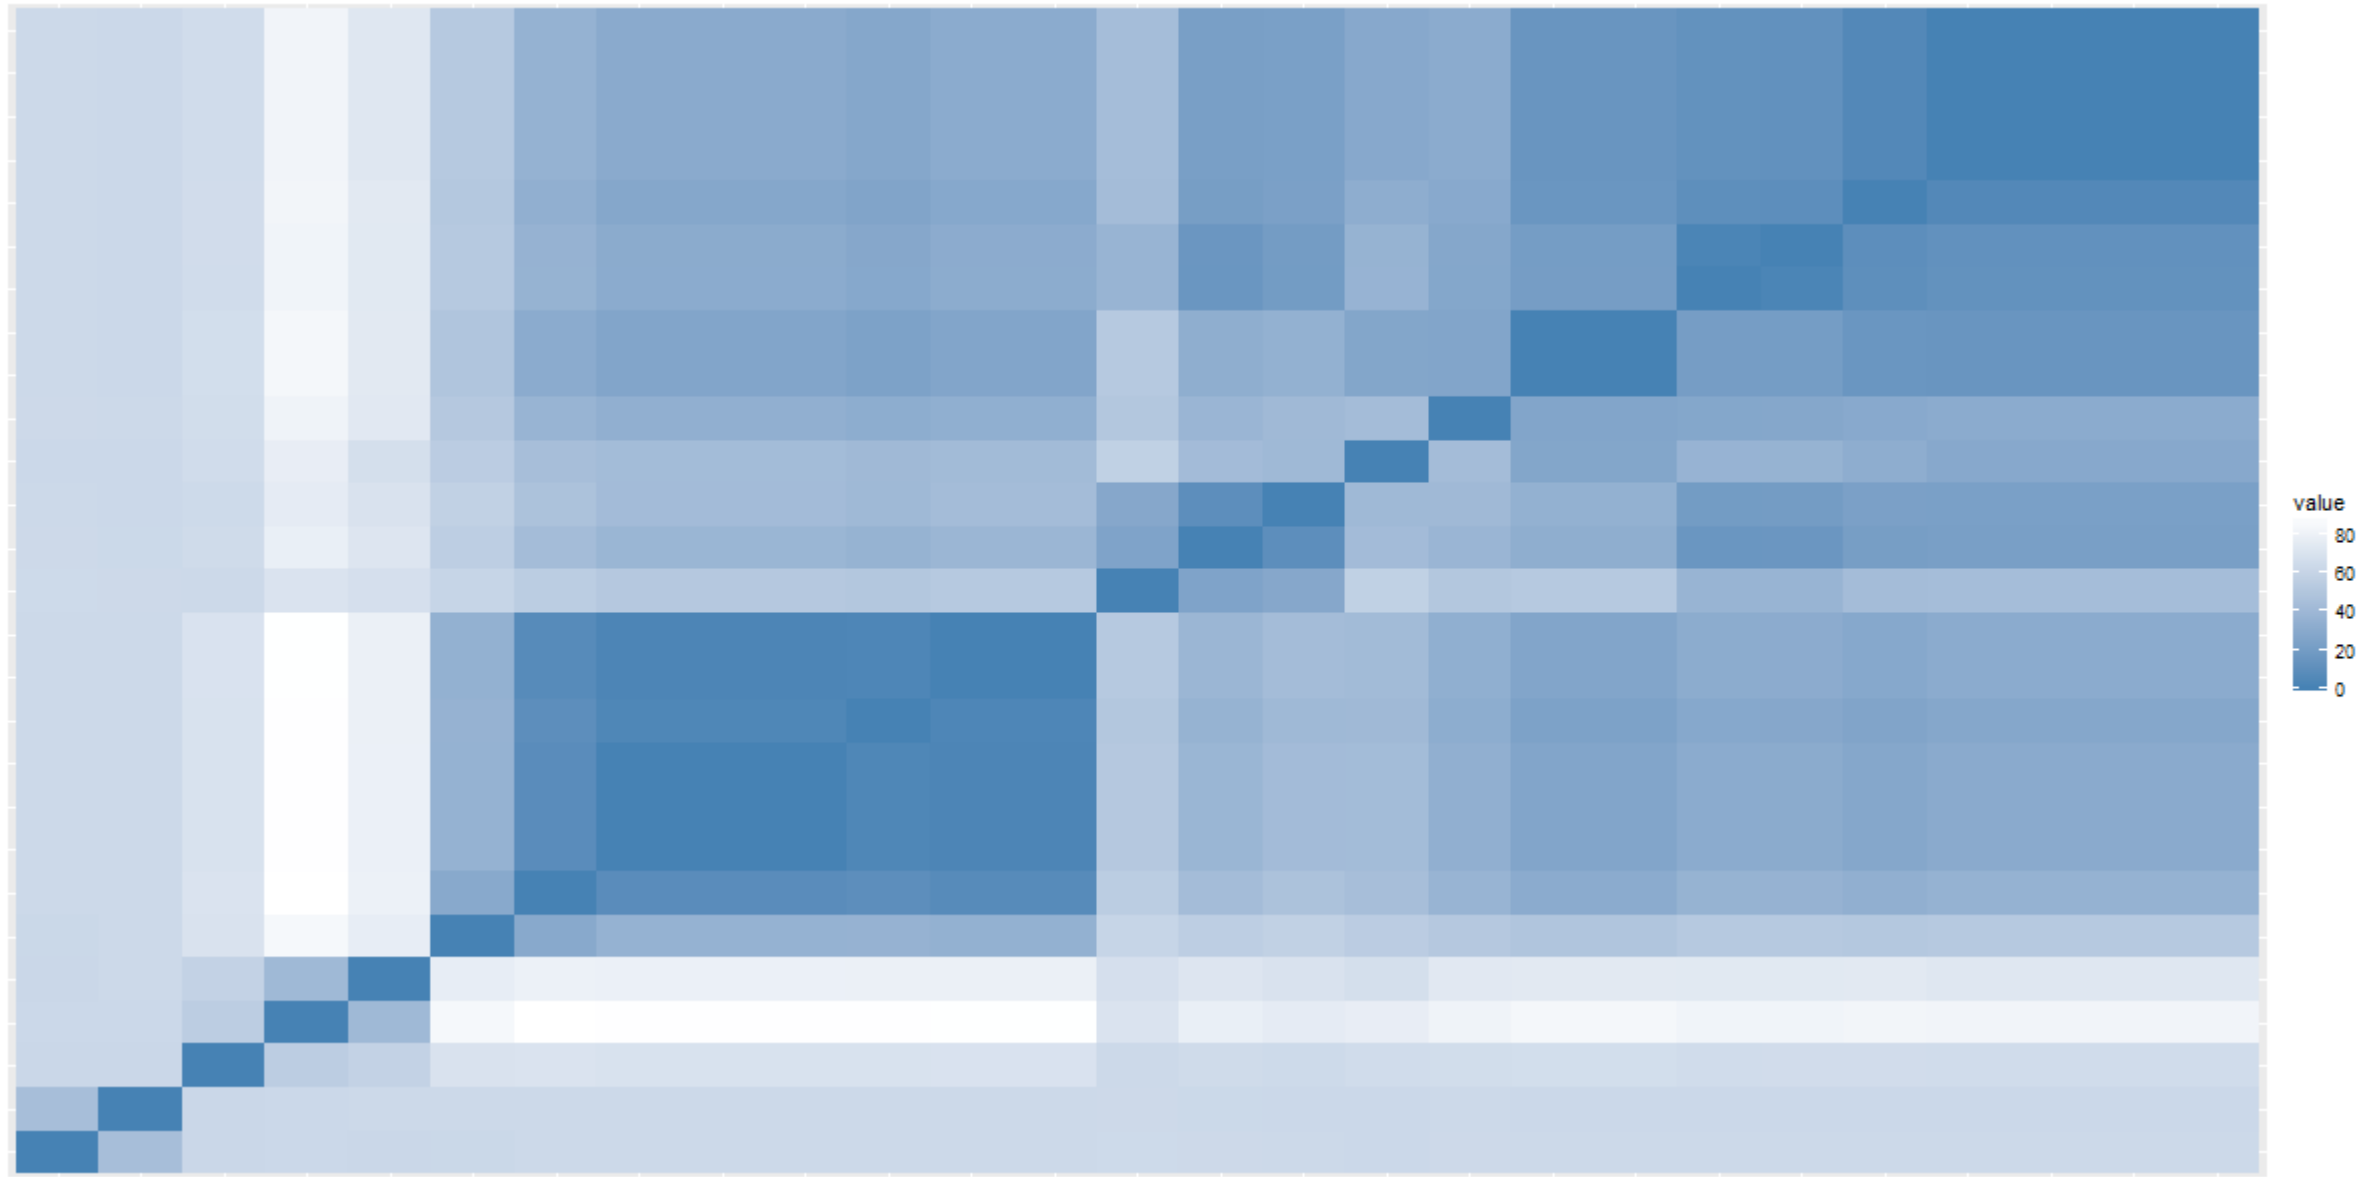

# "Fusion"

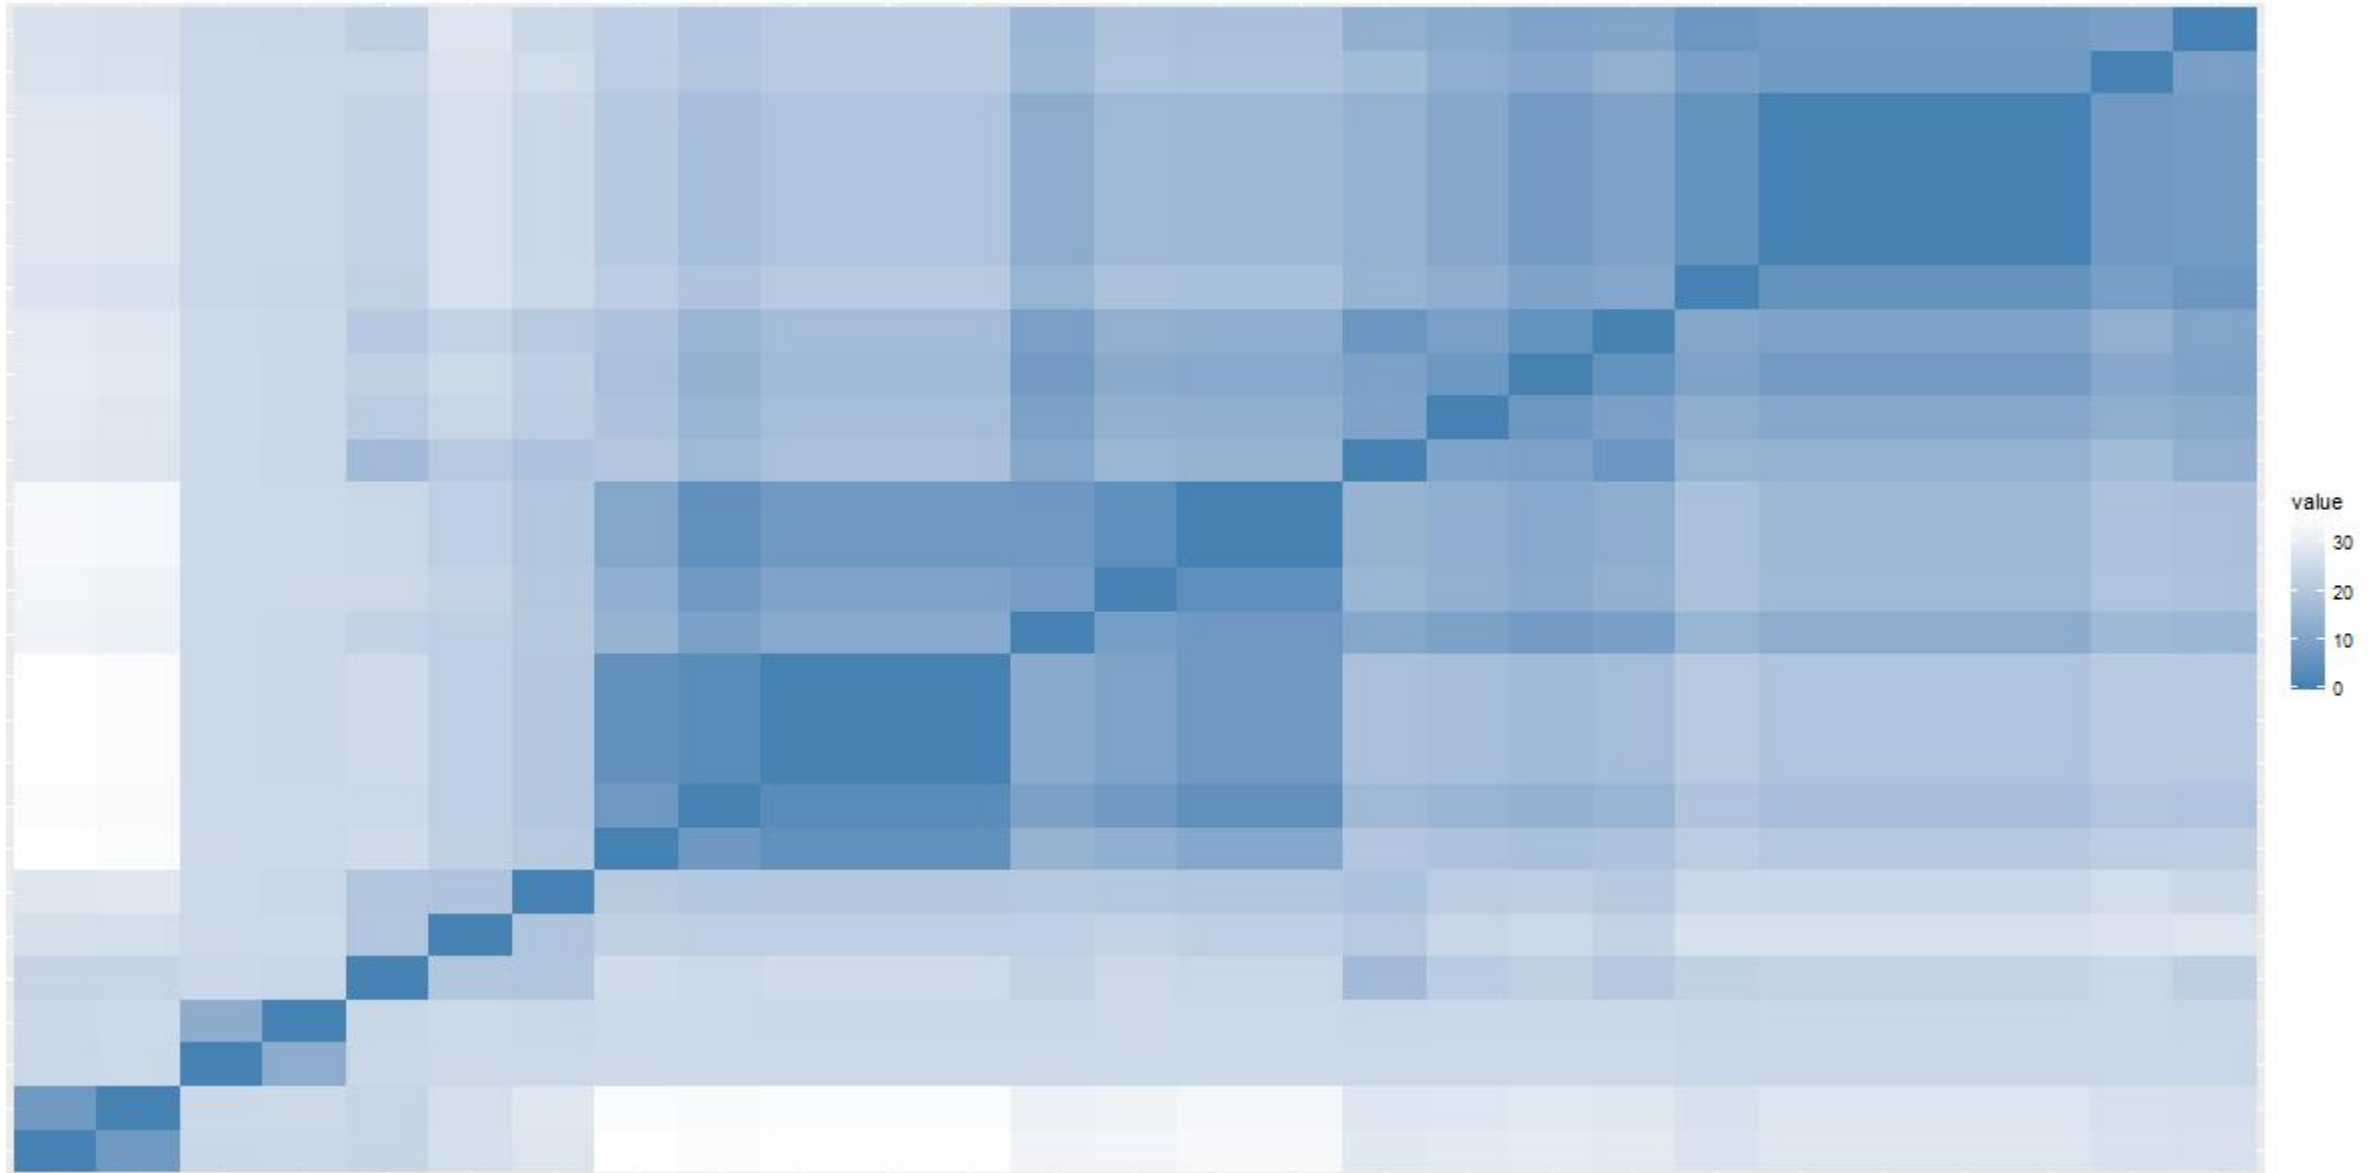

“Combined\_score”

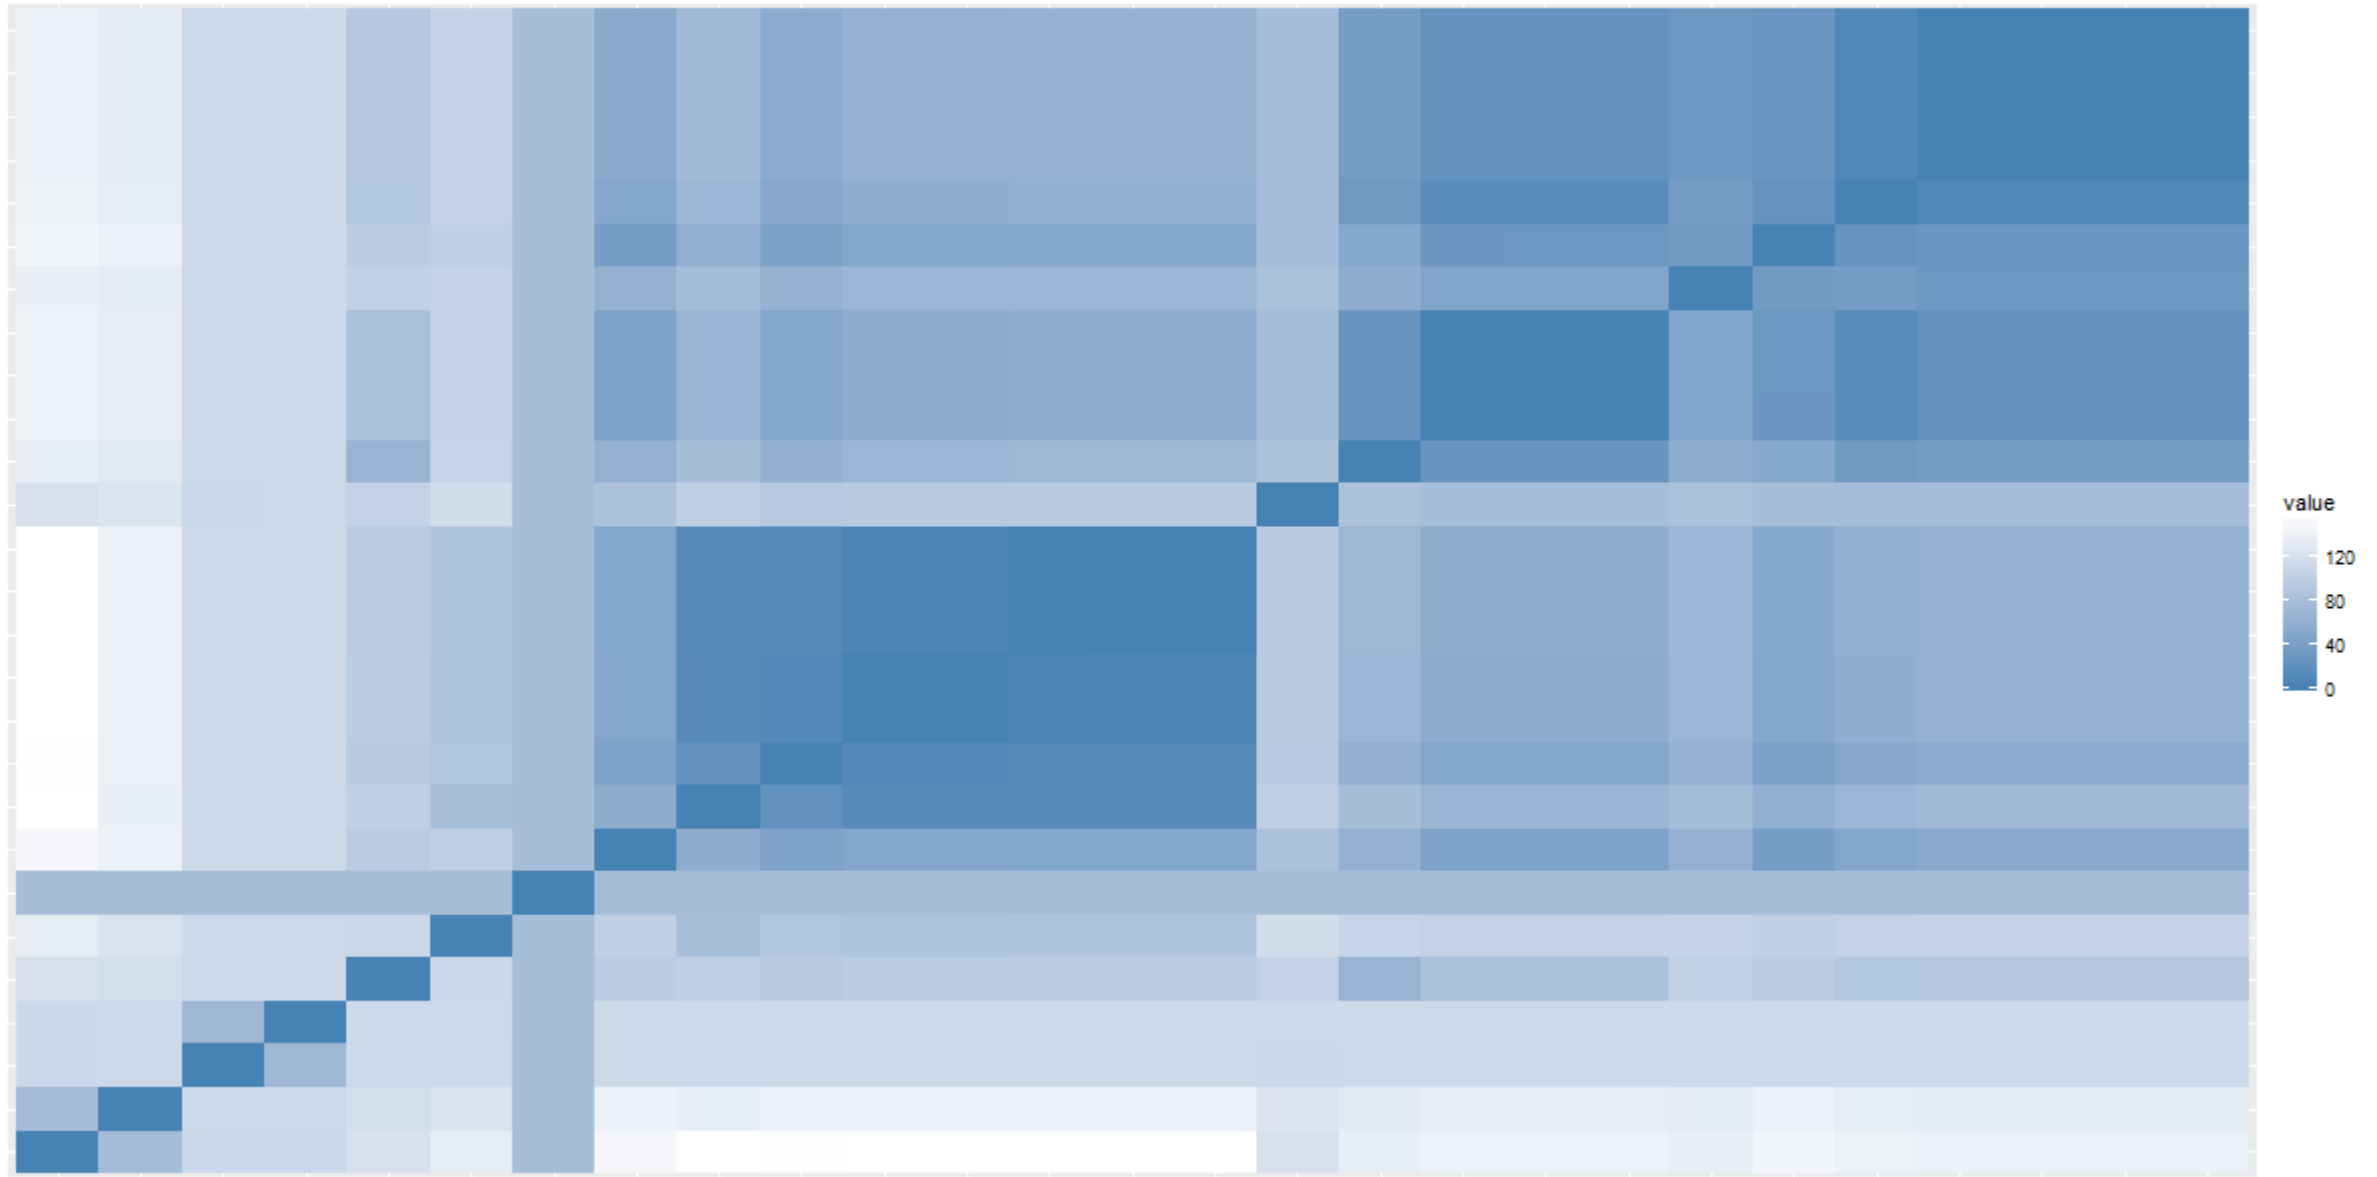

# “Homology”

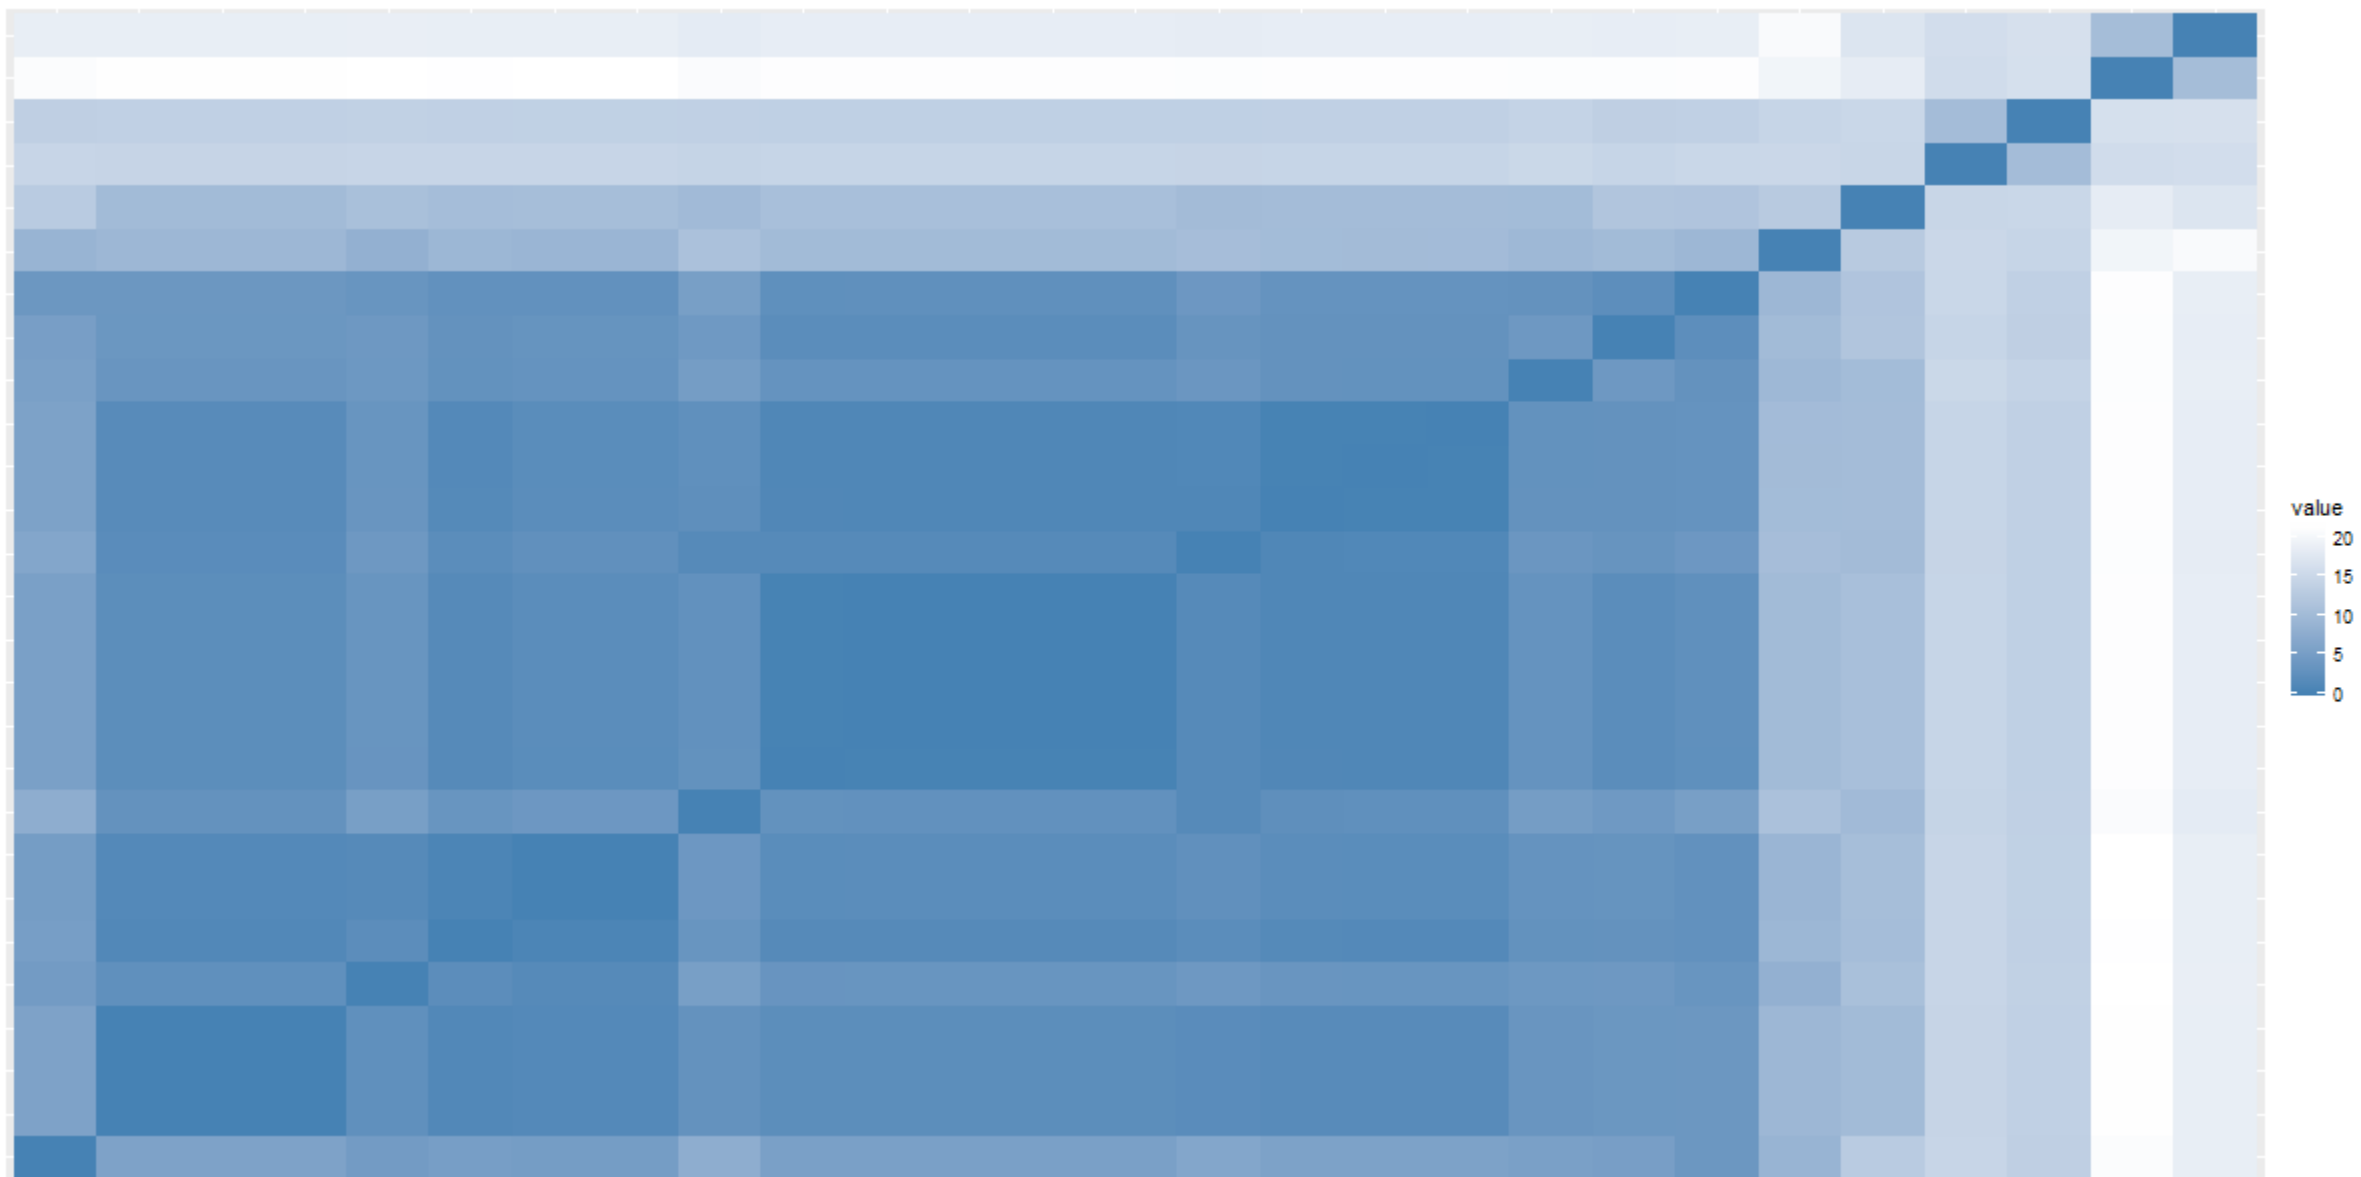

Supplement: 12918_2018_598_MOESM5_ESM.pdf [file 12918_2018_598_MOESM5_ESM.pdf]
