# Supplementary material for: A systematic survey of centrality measures for protein-protein interaction networks
Source: Springer Nature journal article supplement (doi:10.1186/s12918-018-0598-2), 2018-07-31

# “Coexpression”

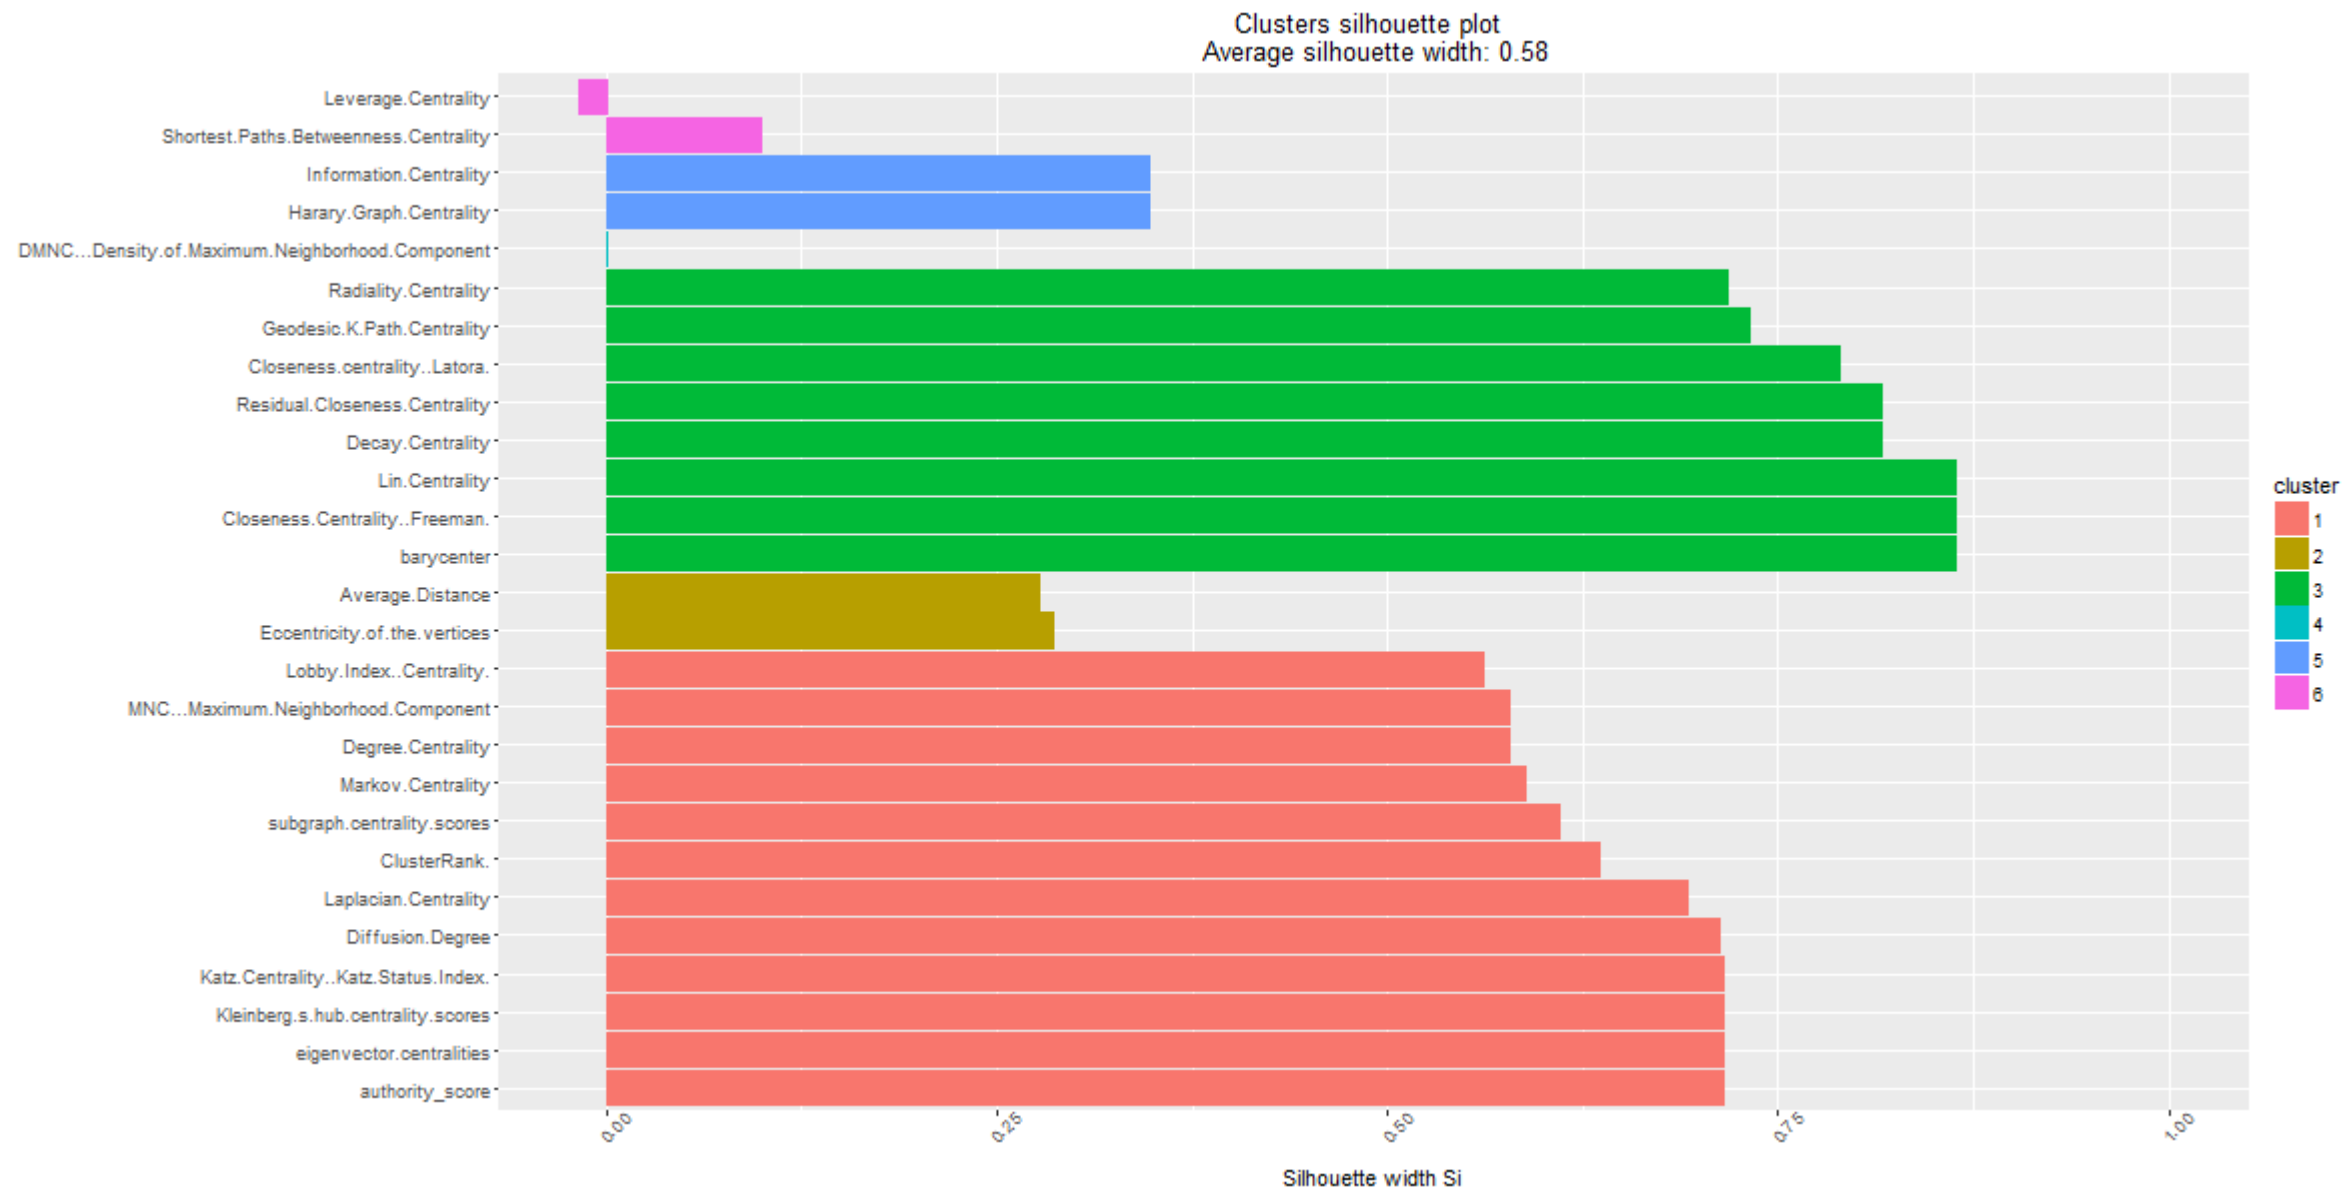

# “Coexpression\_transferred”

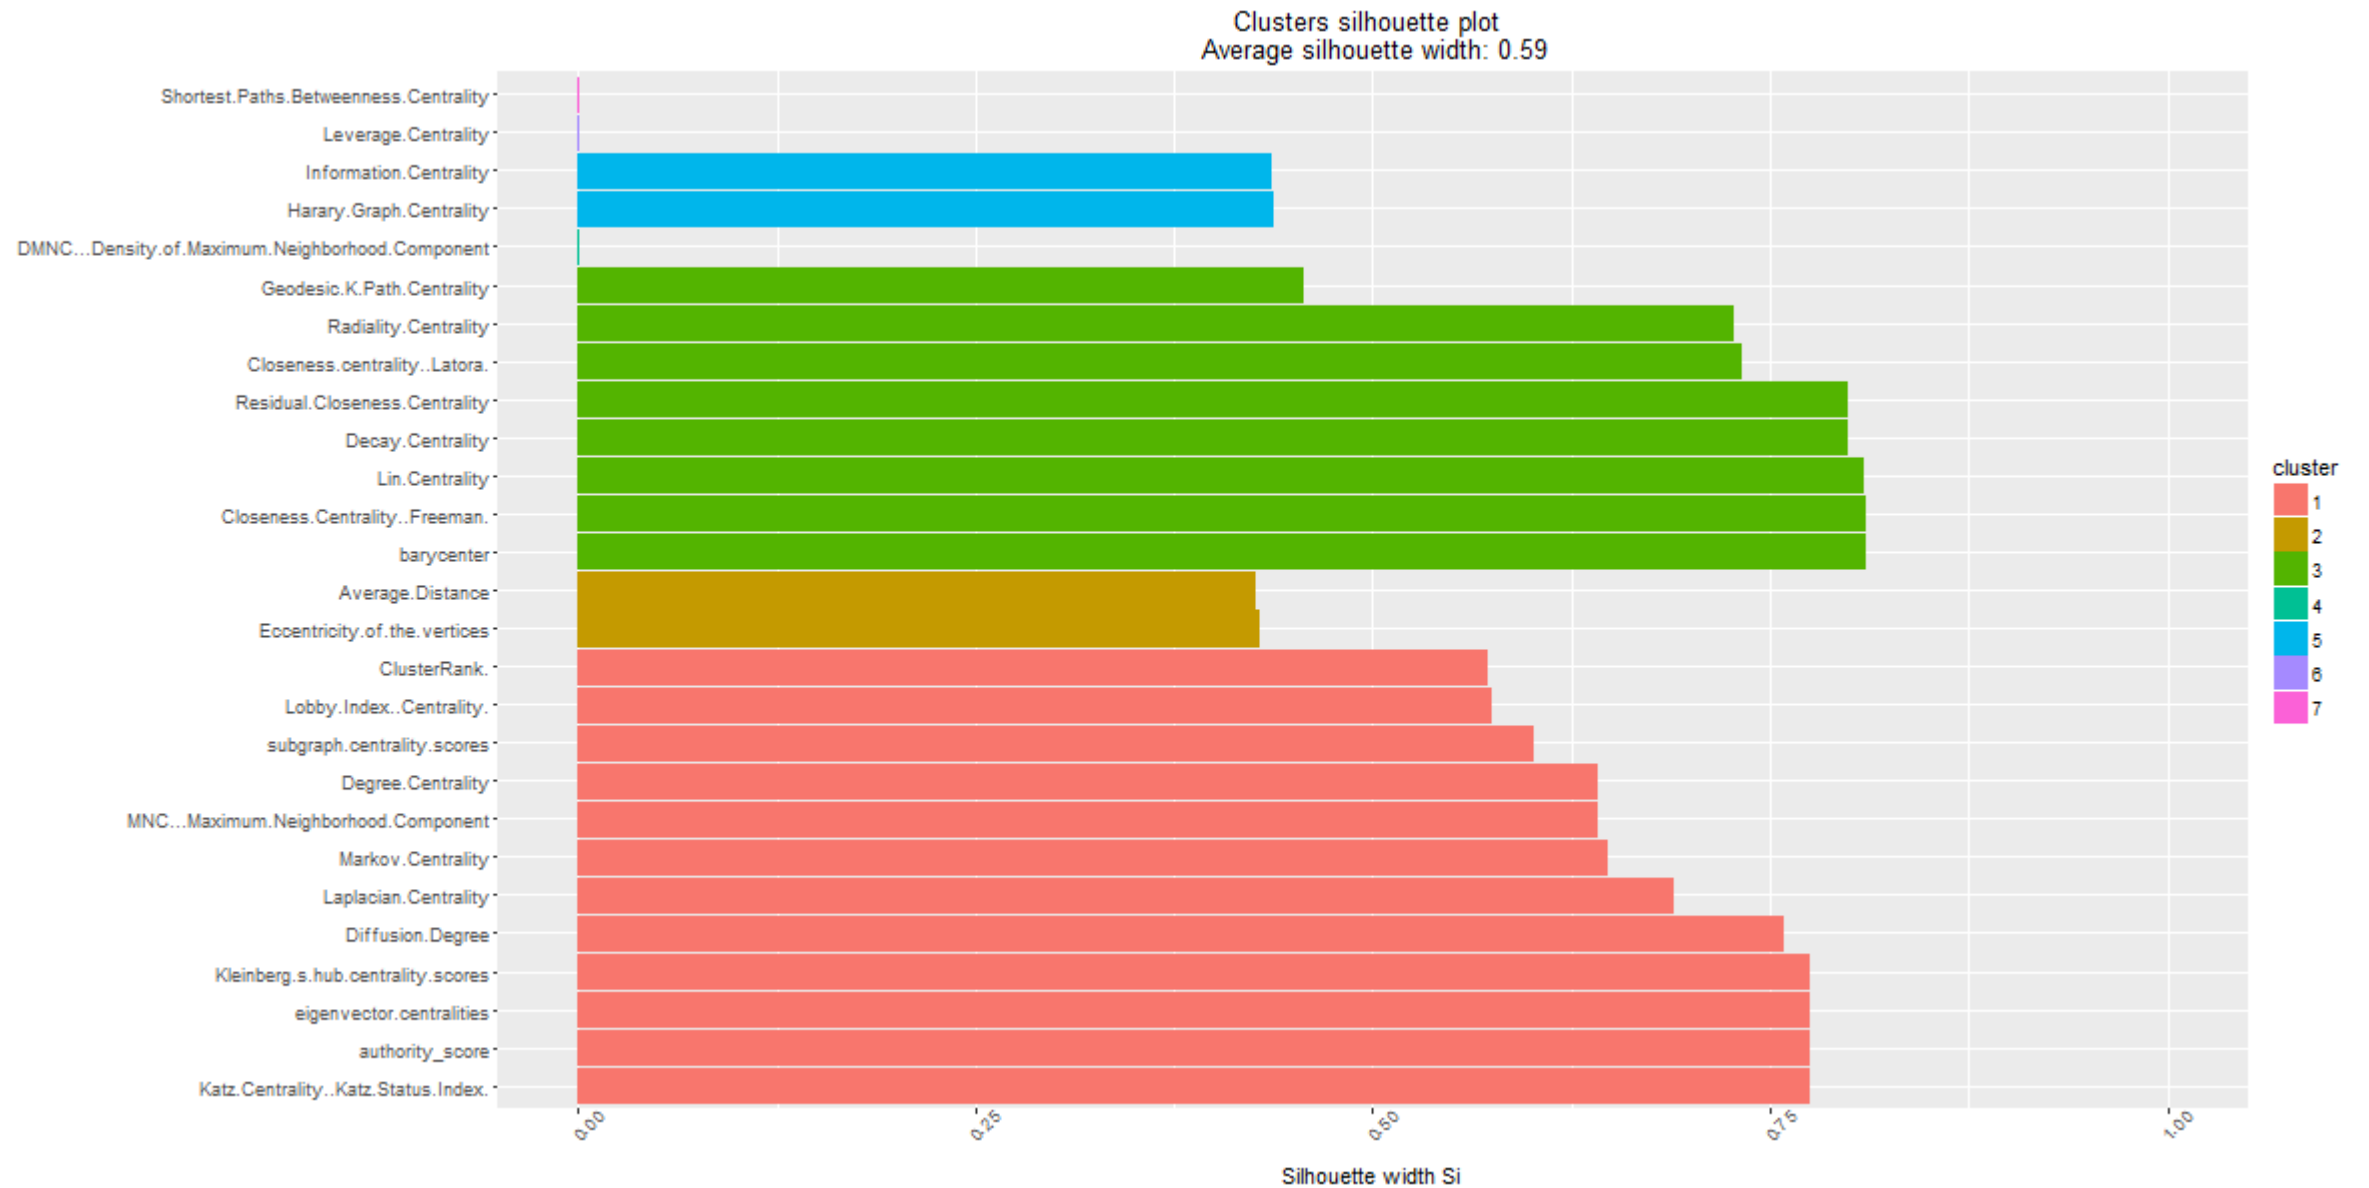

# “Cooccurence”

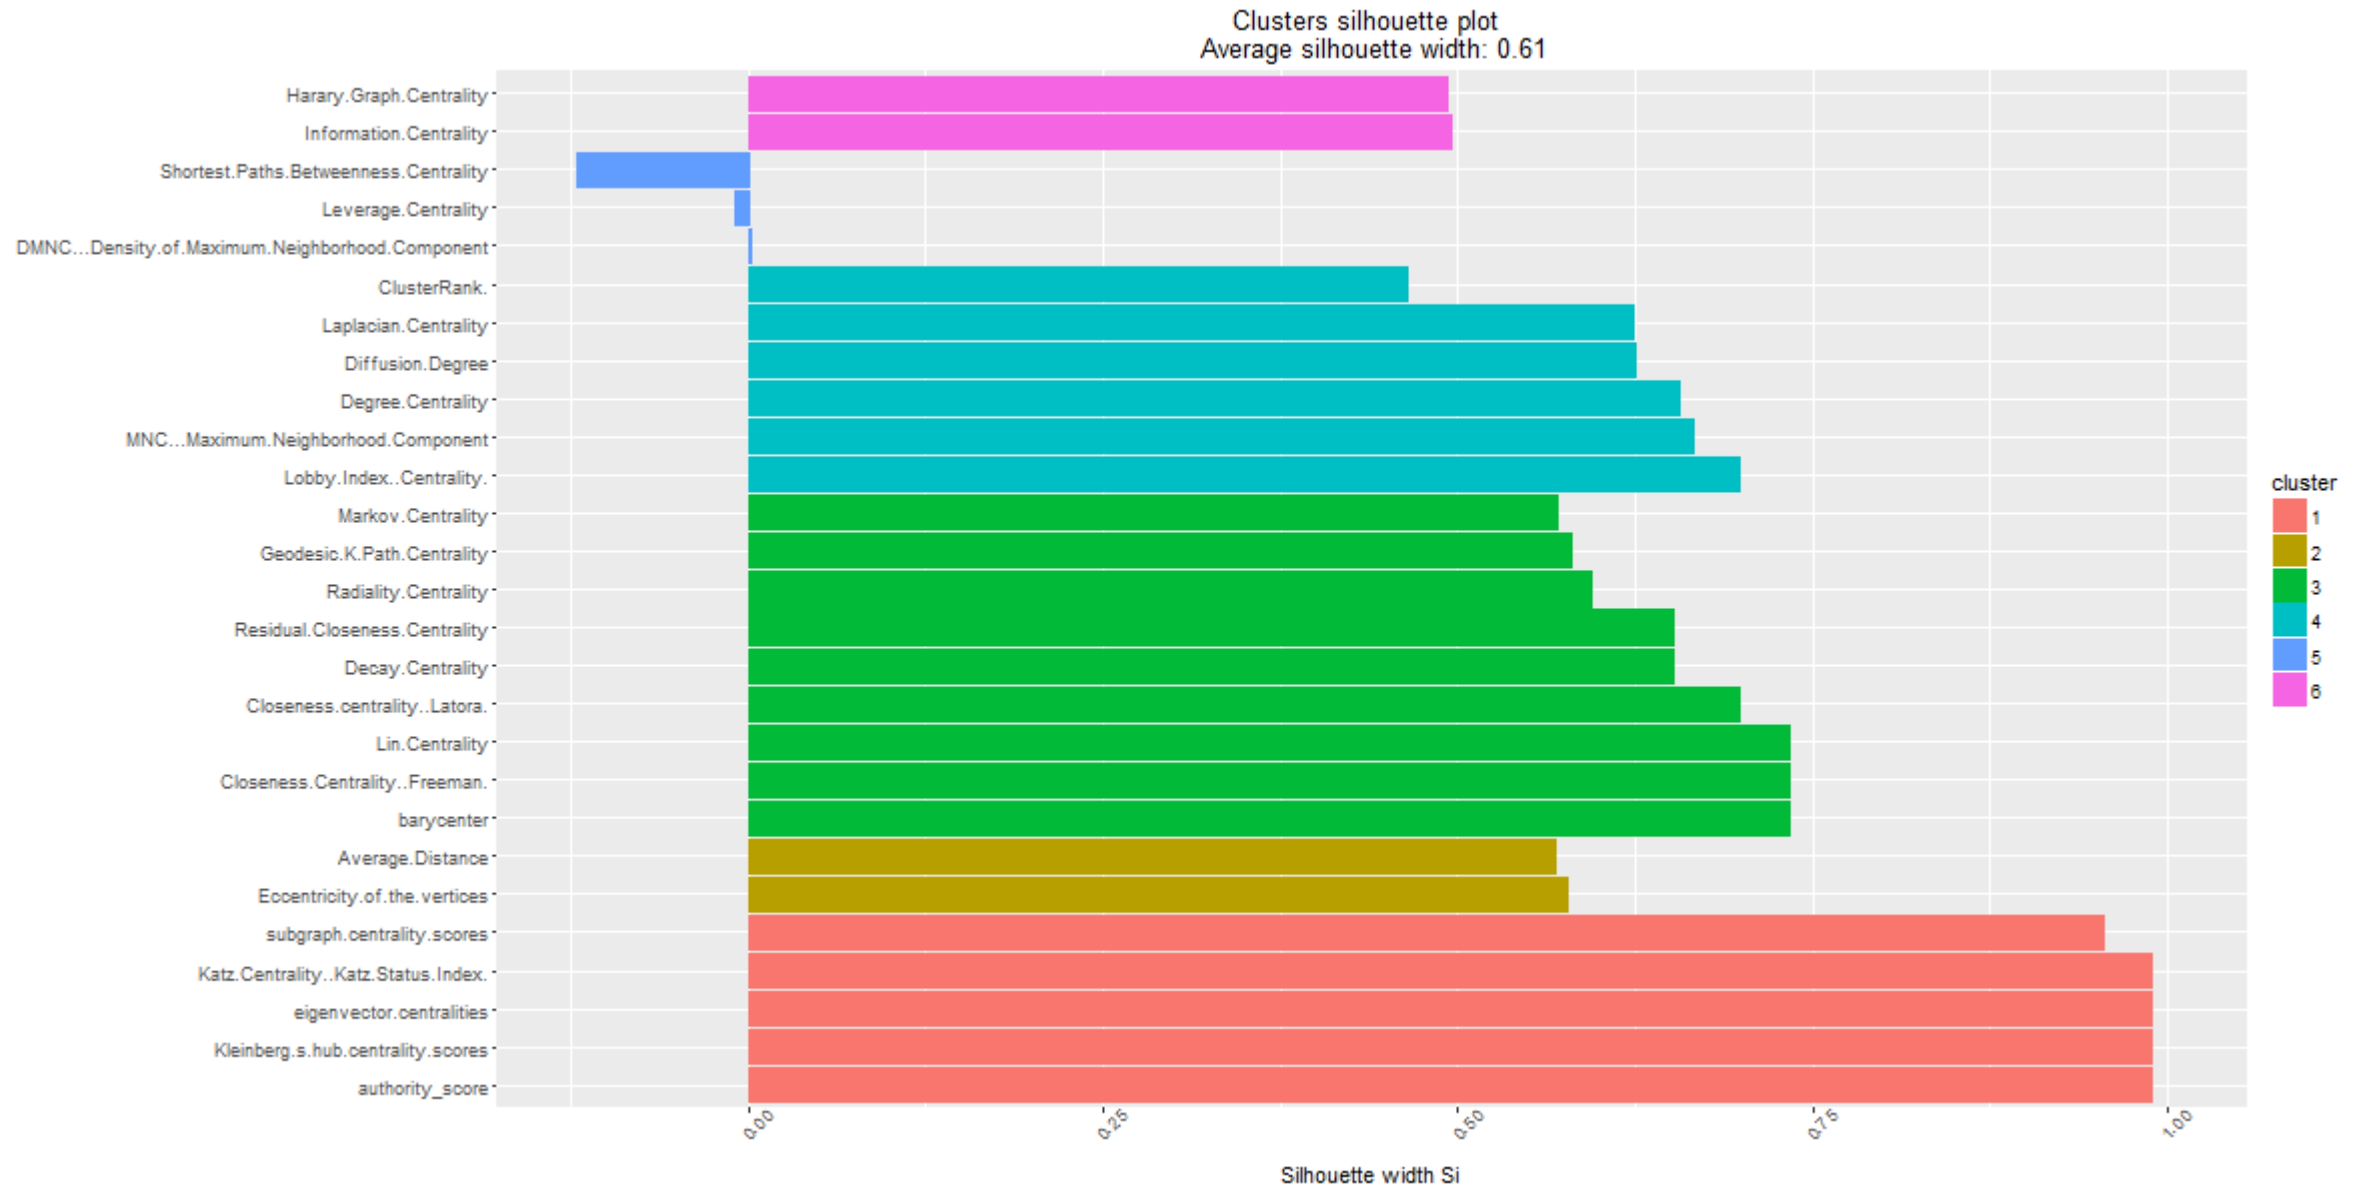

# "Database"

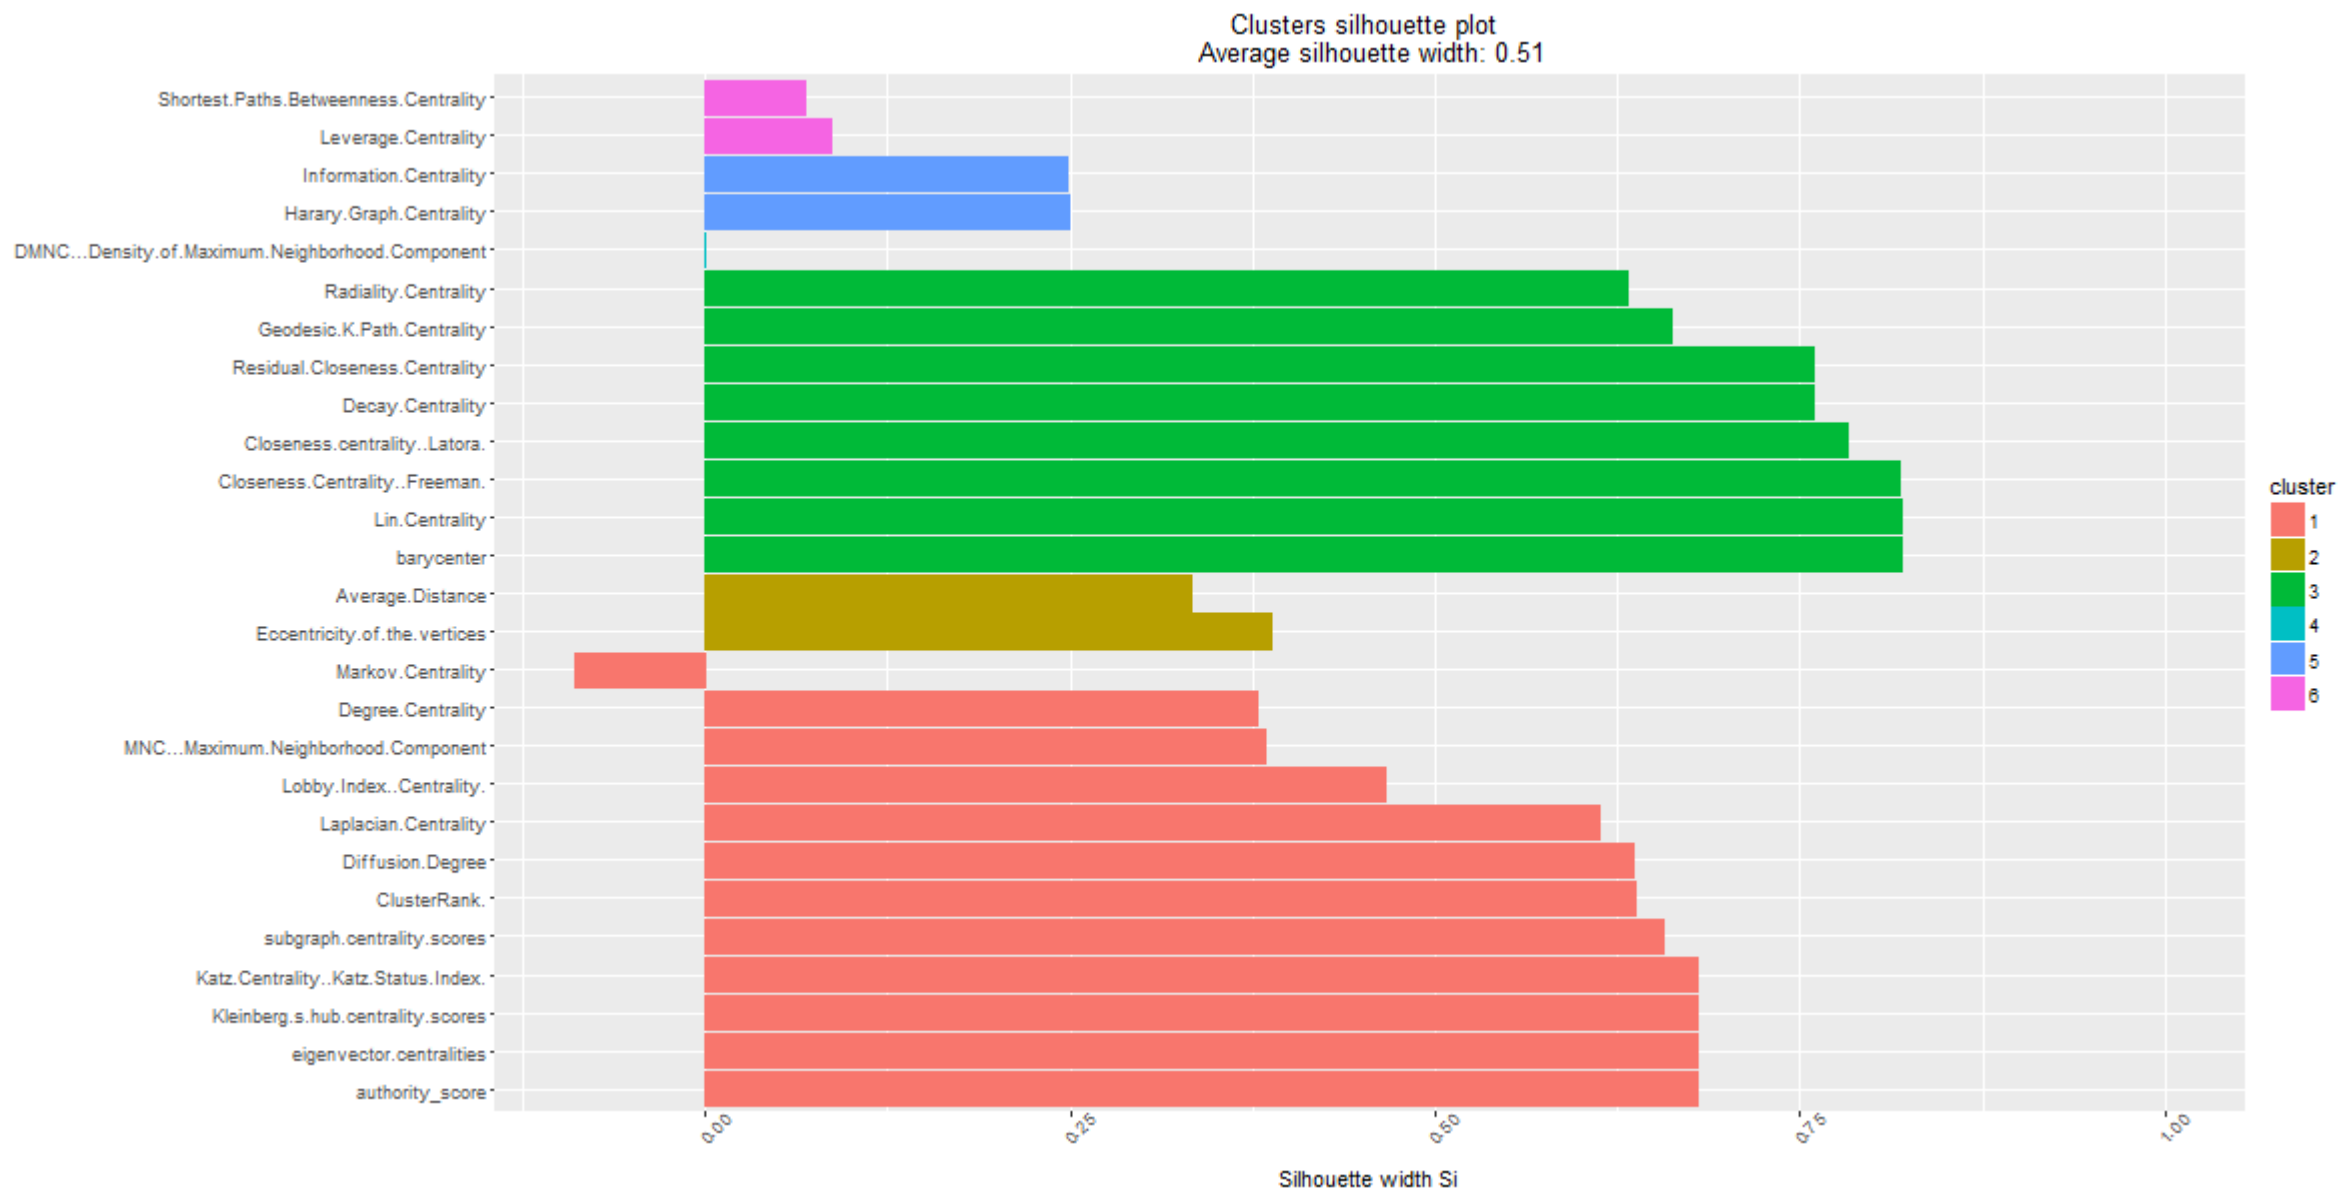

# "Database\_transferred"

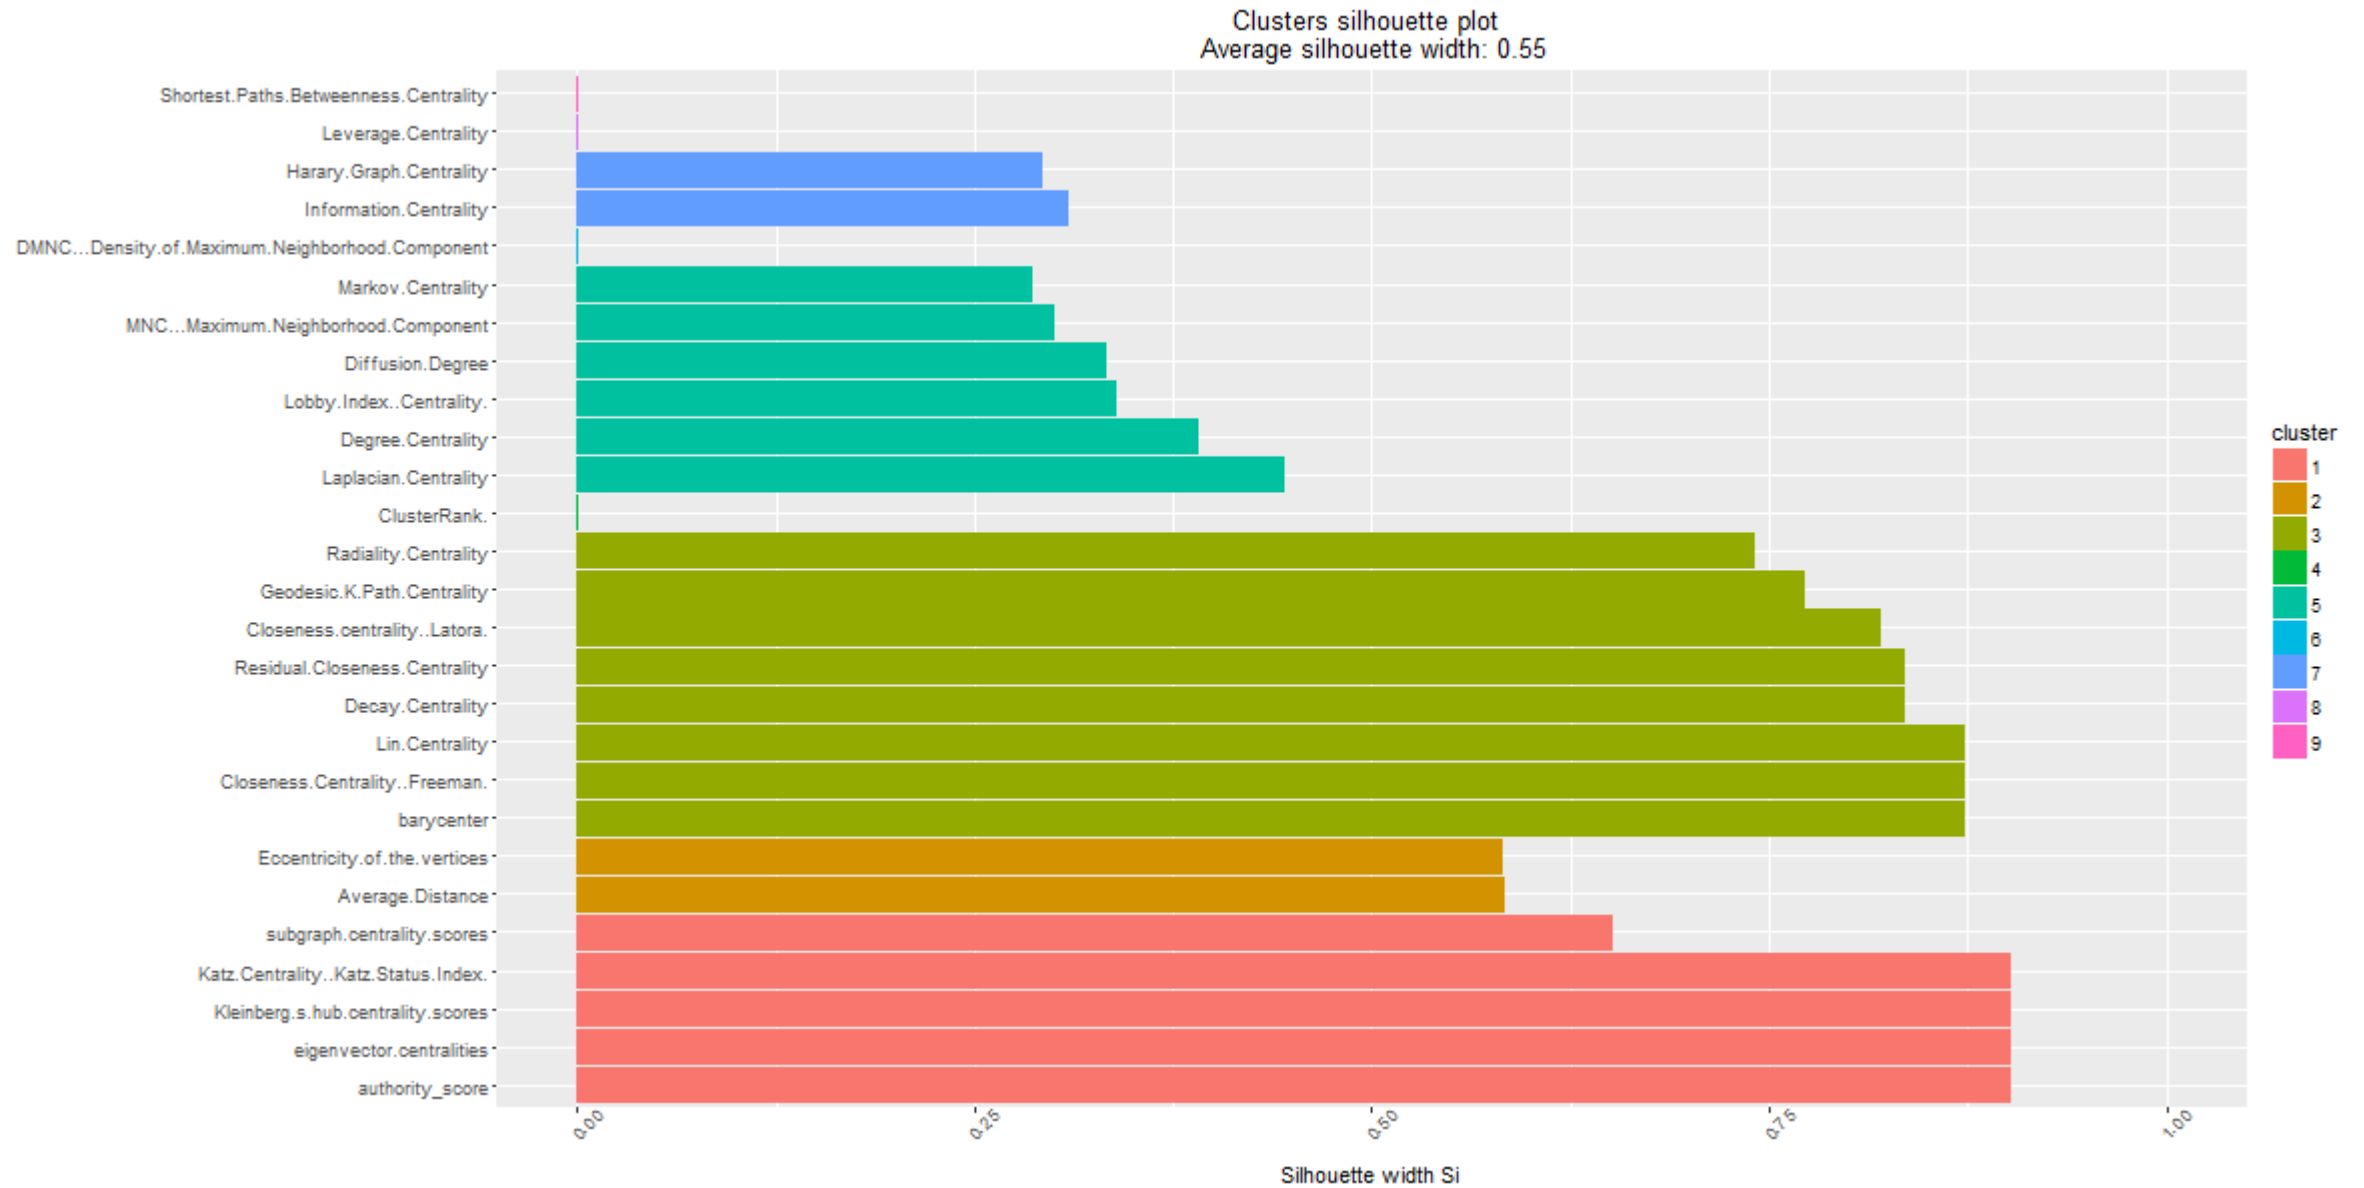

# “Experiments”

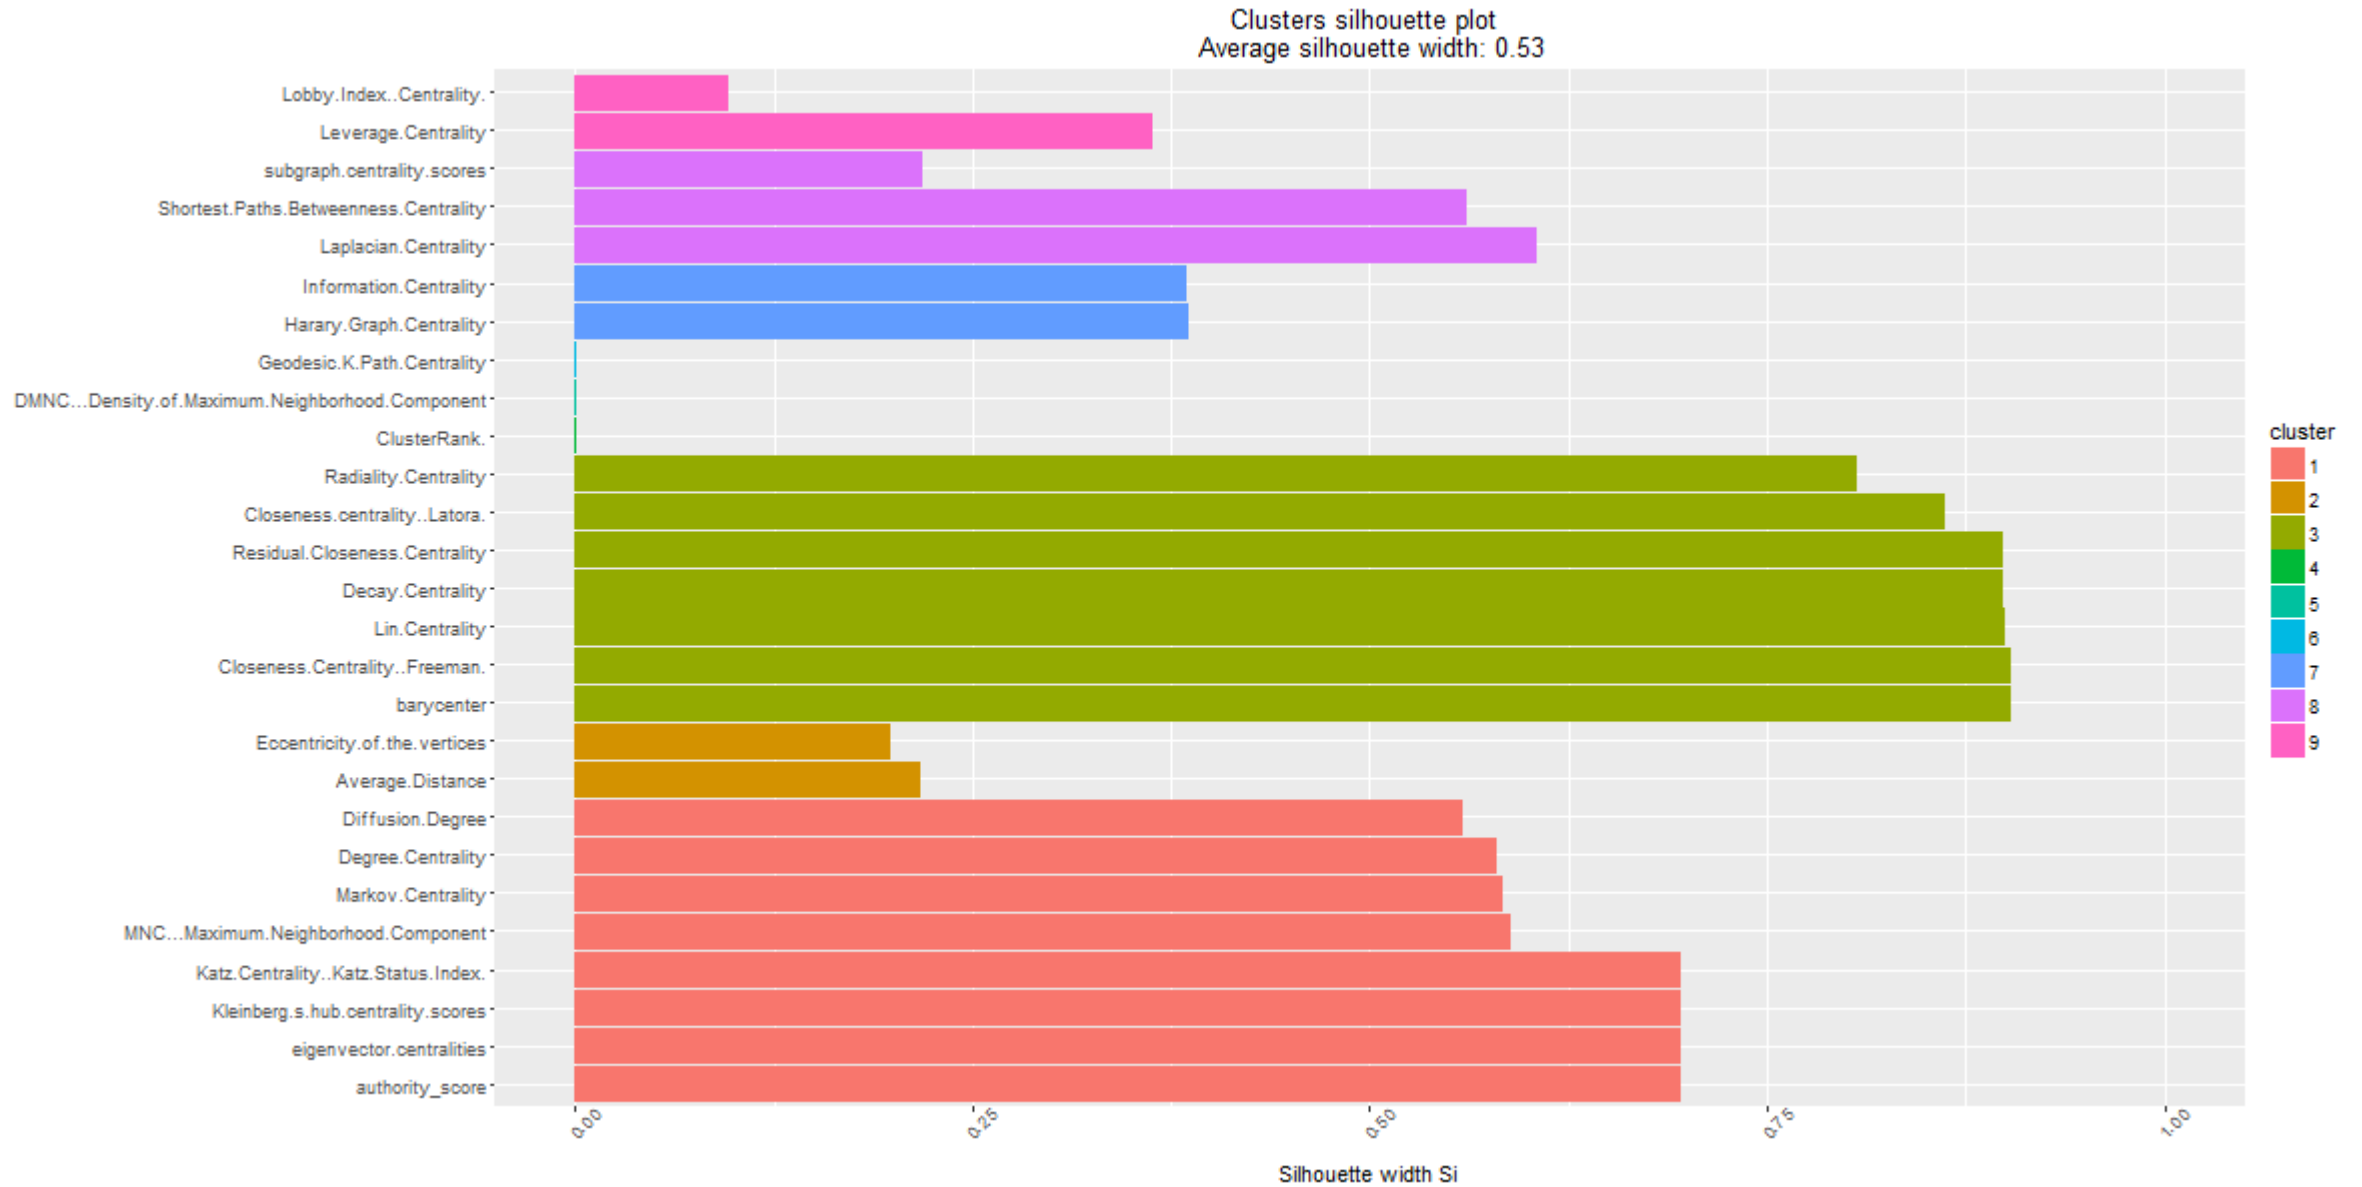

# “Experiments\_transferred”

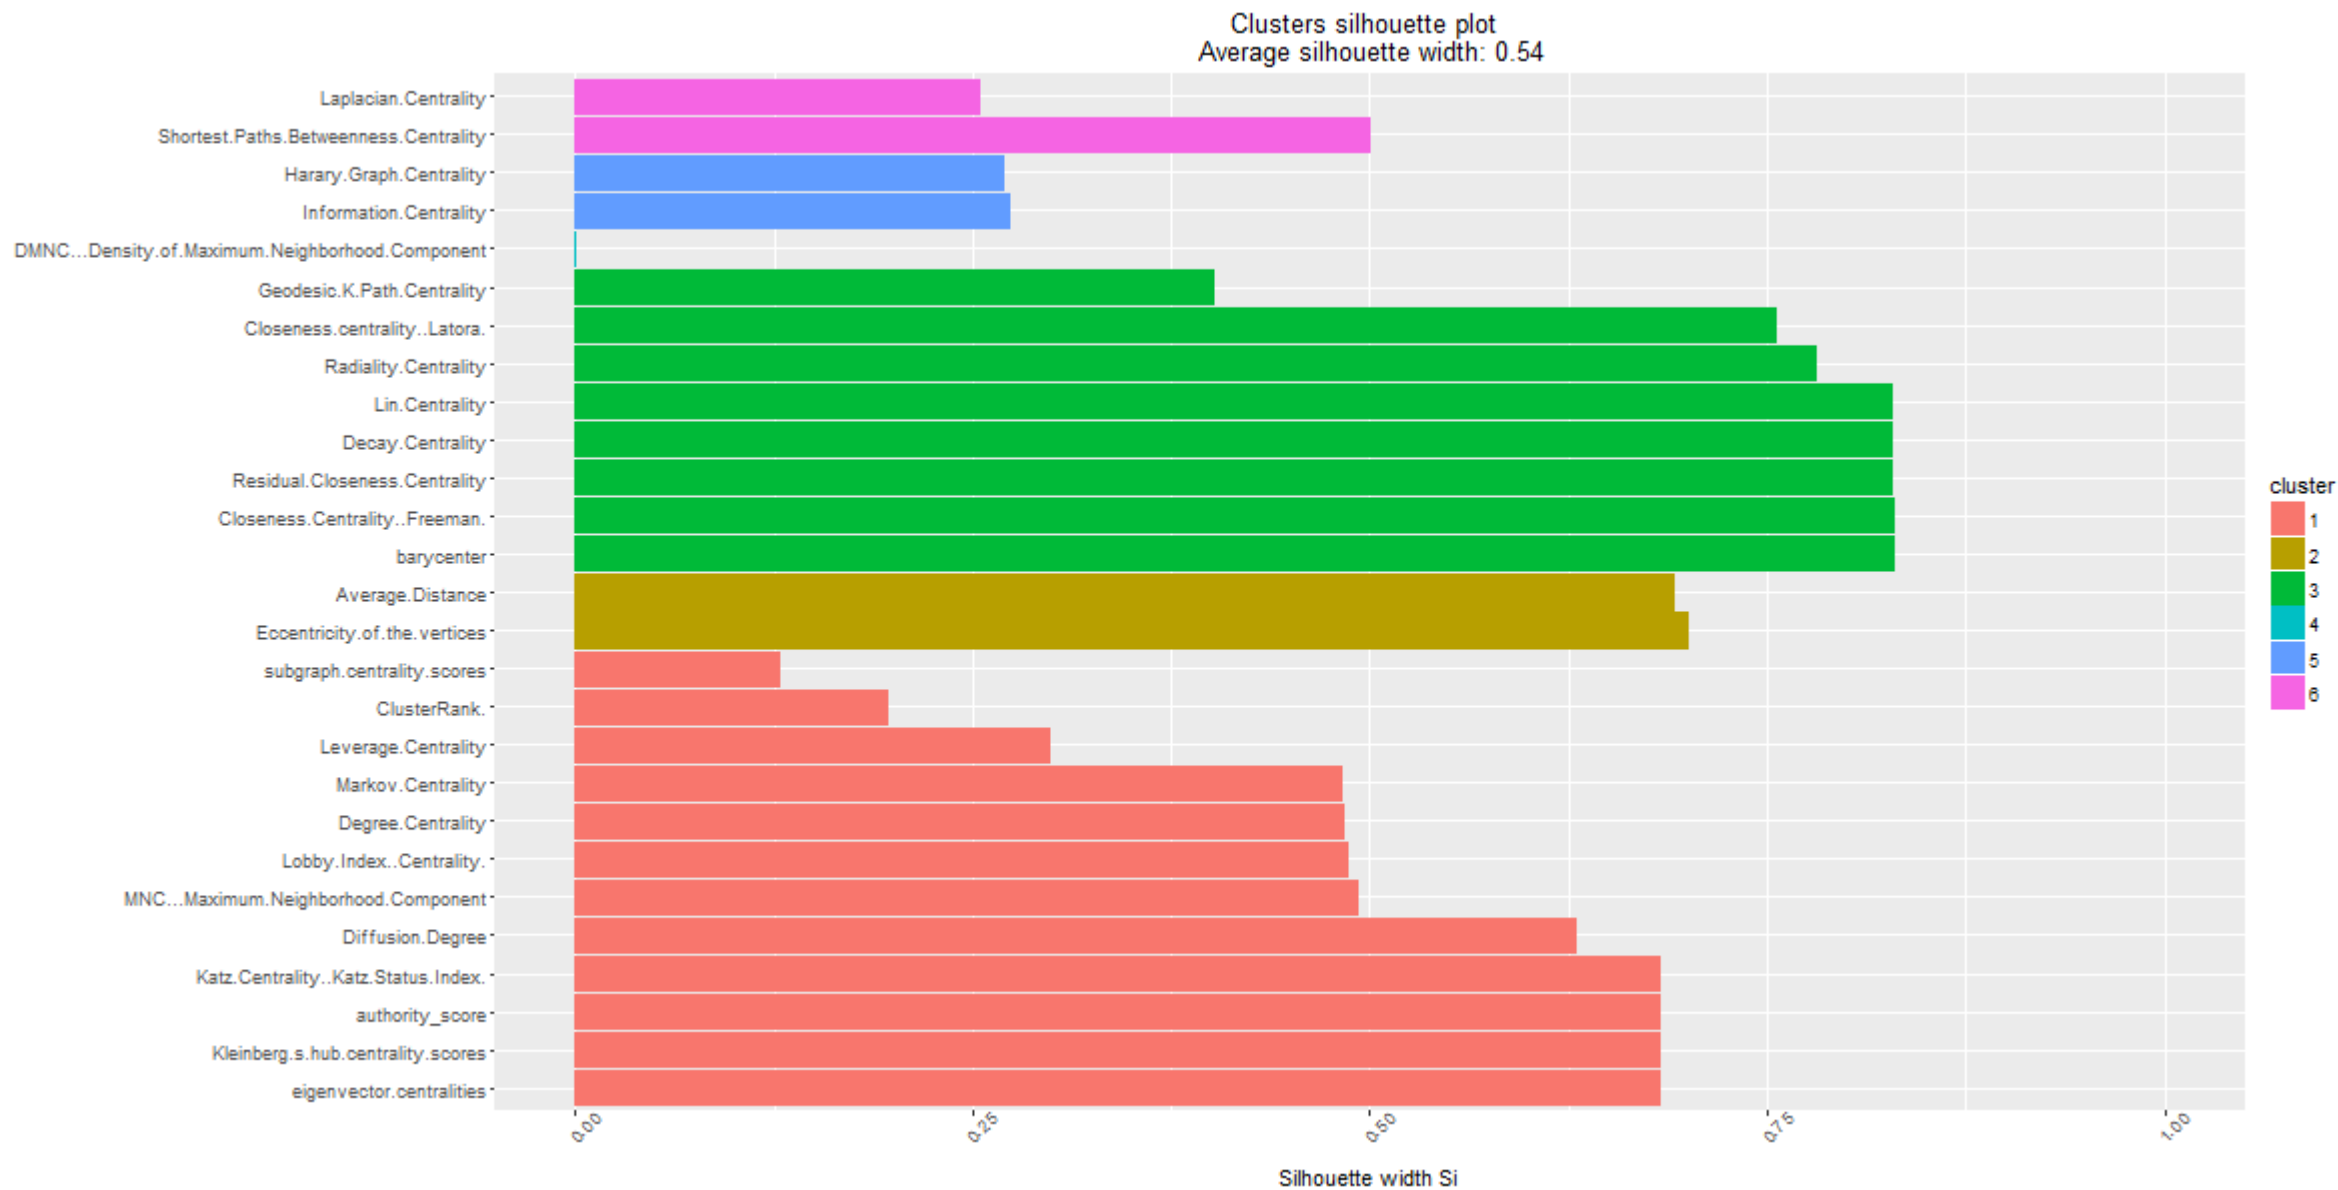

# “Textmining”

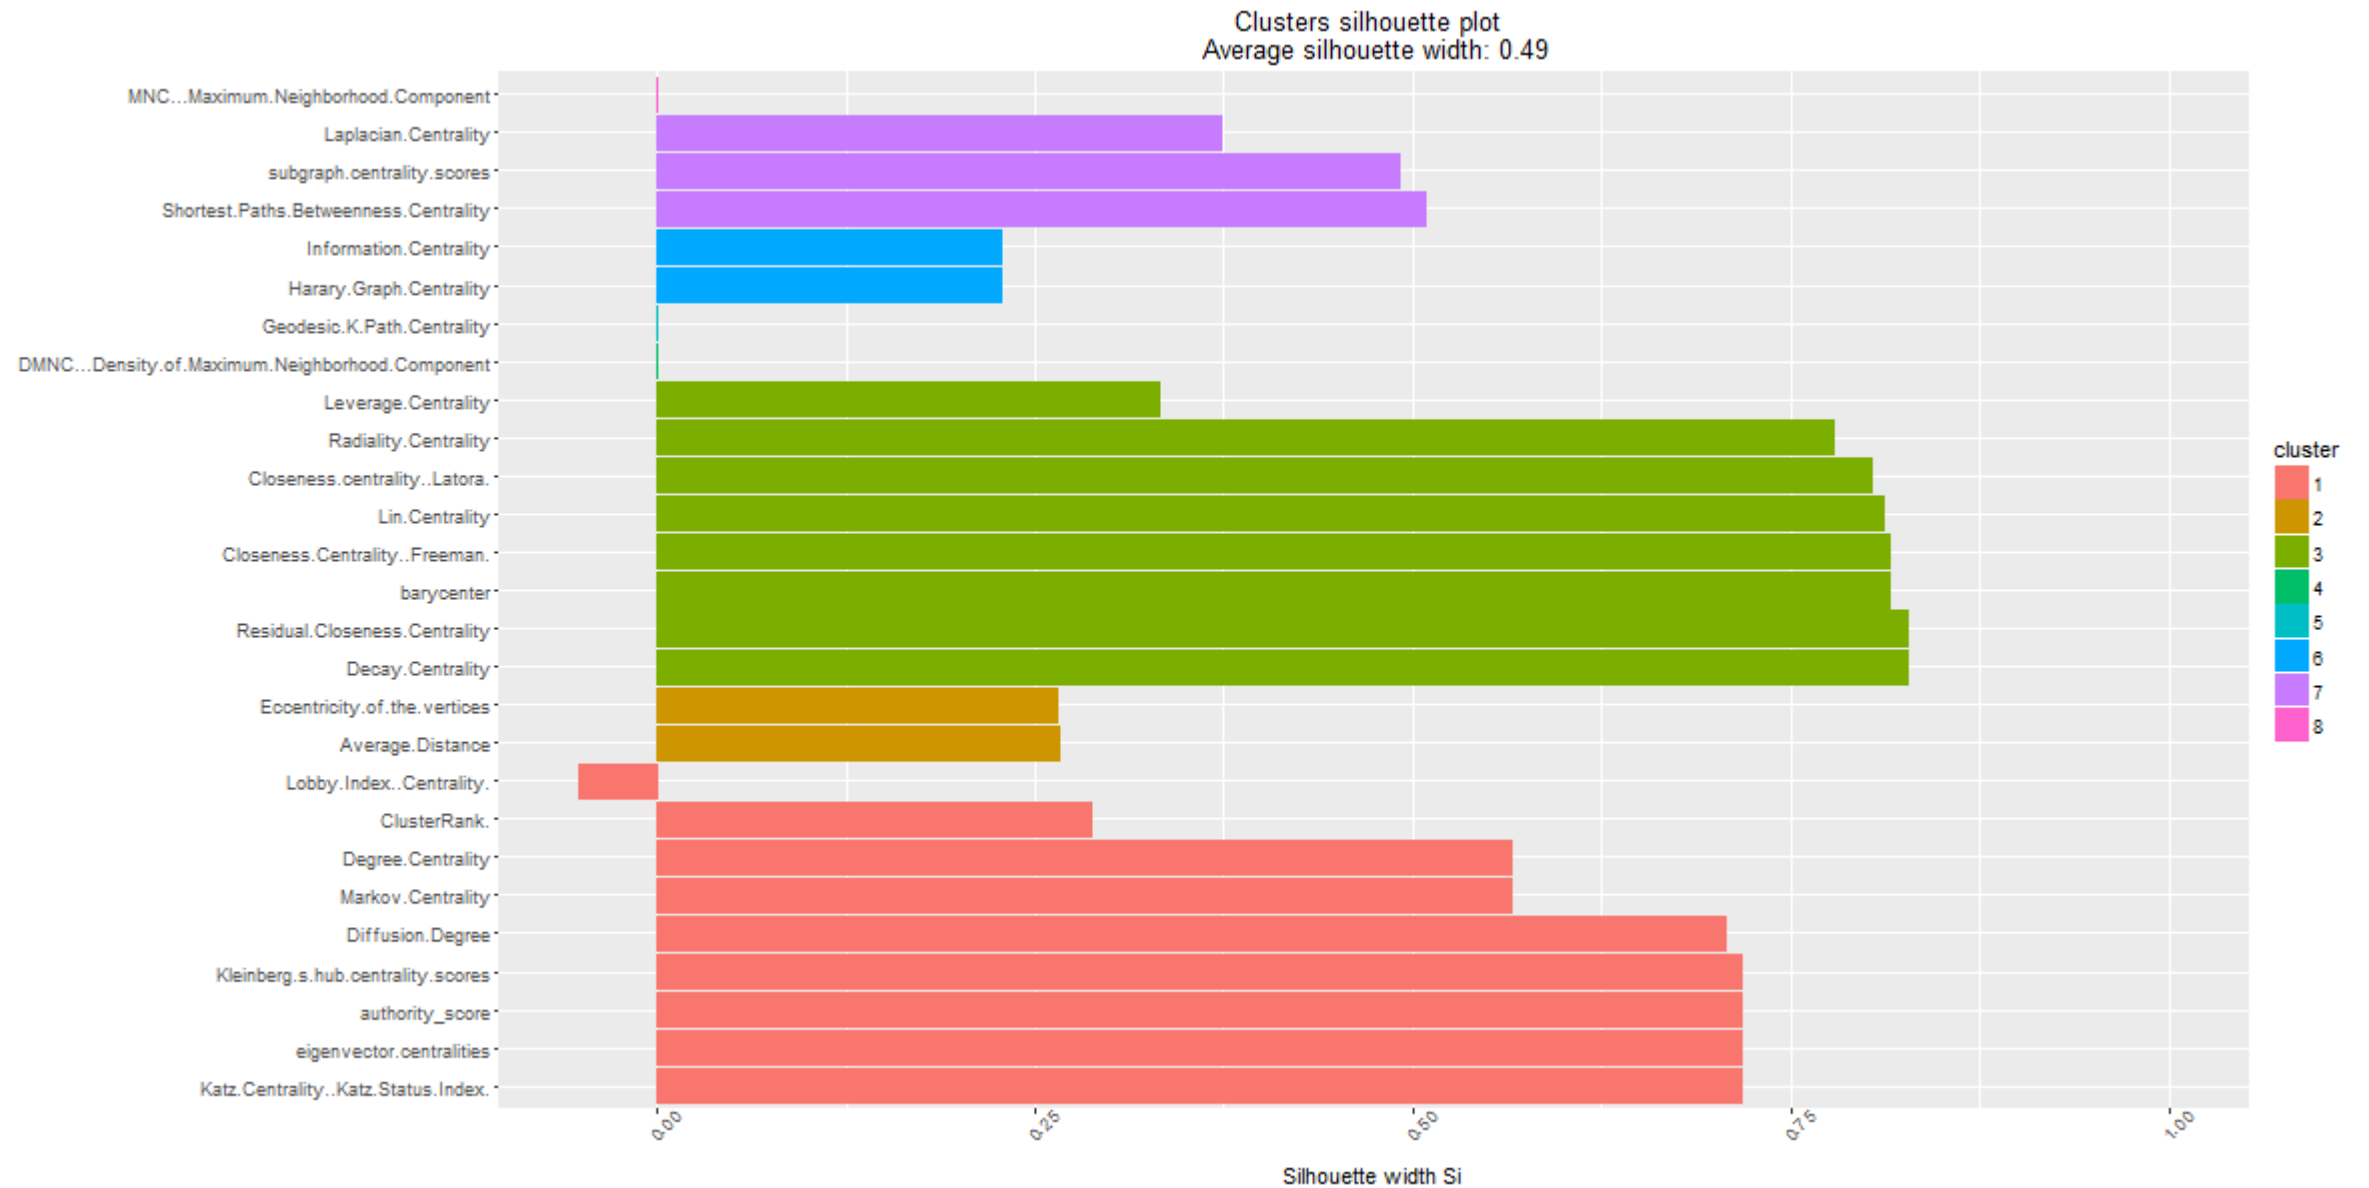



# "Textmining\_transferred"

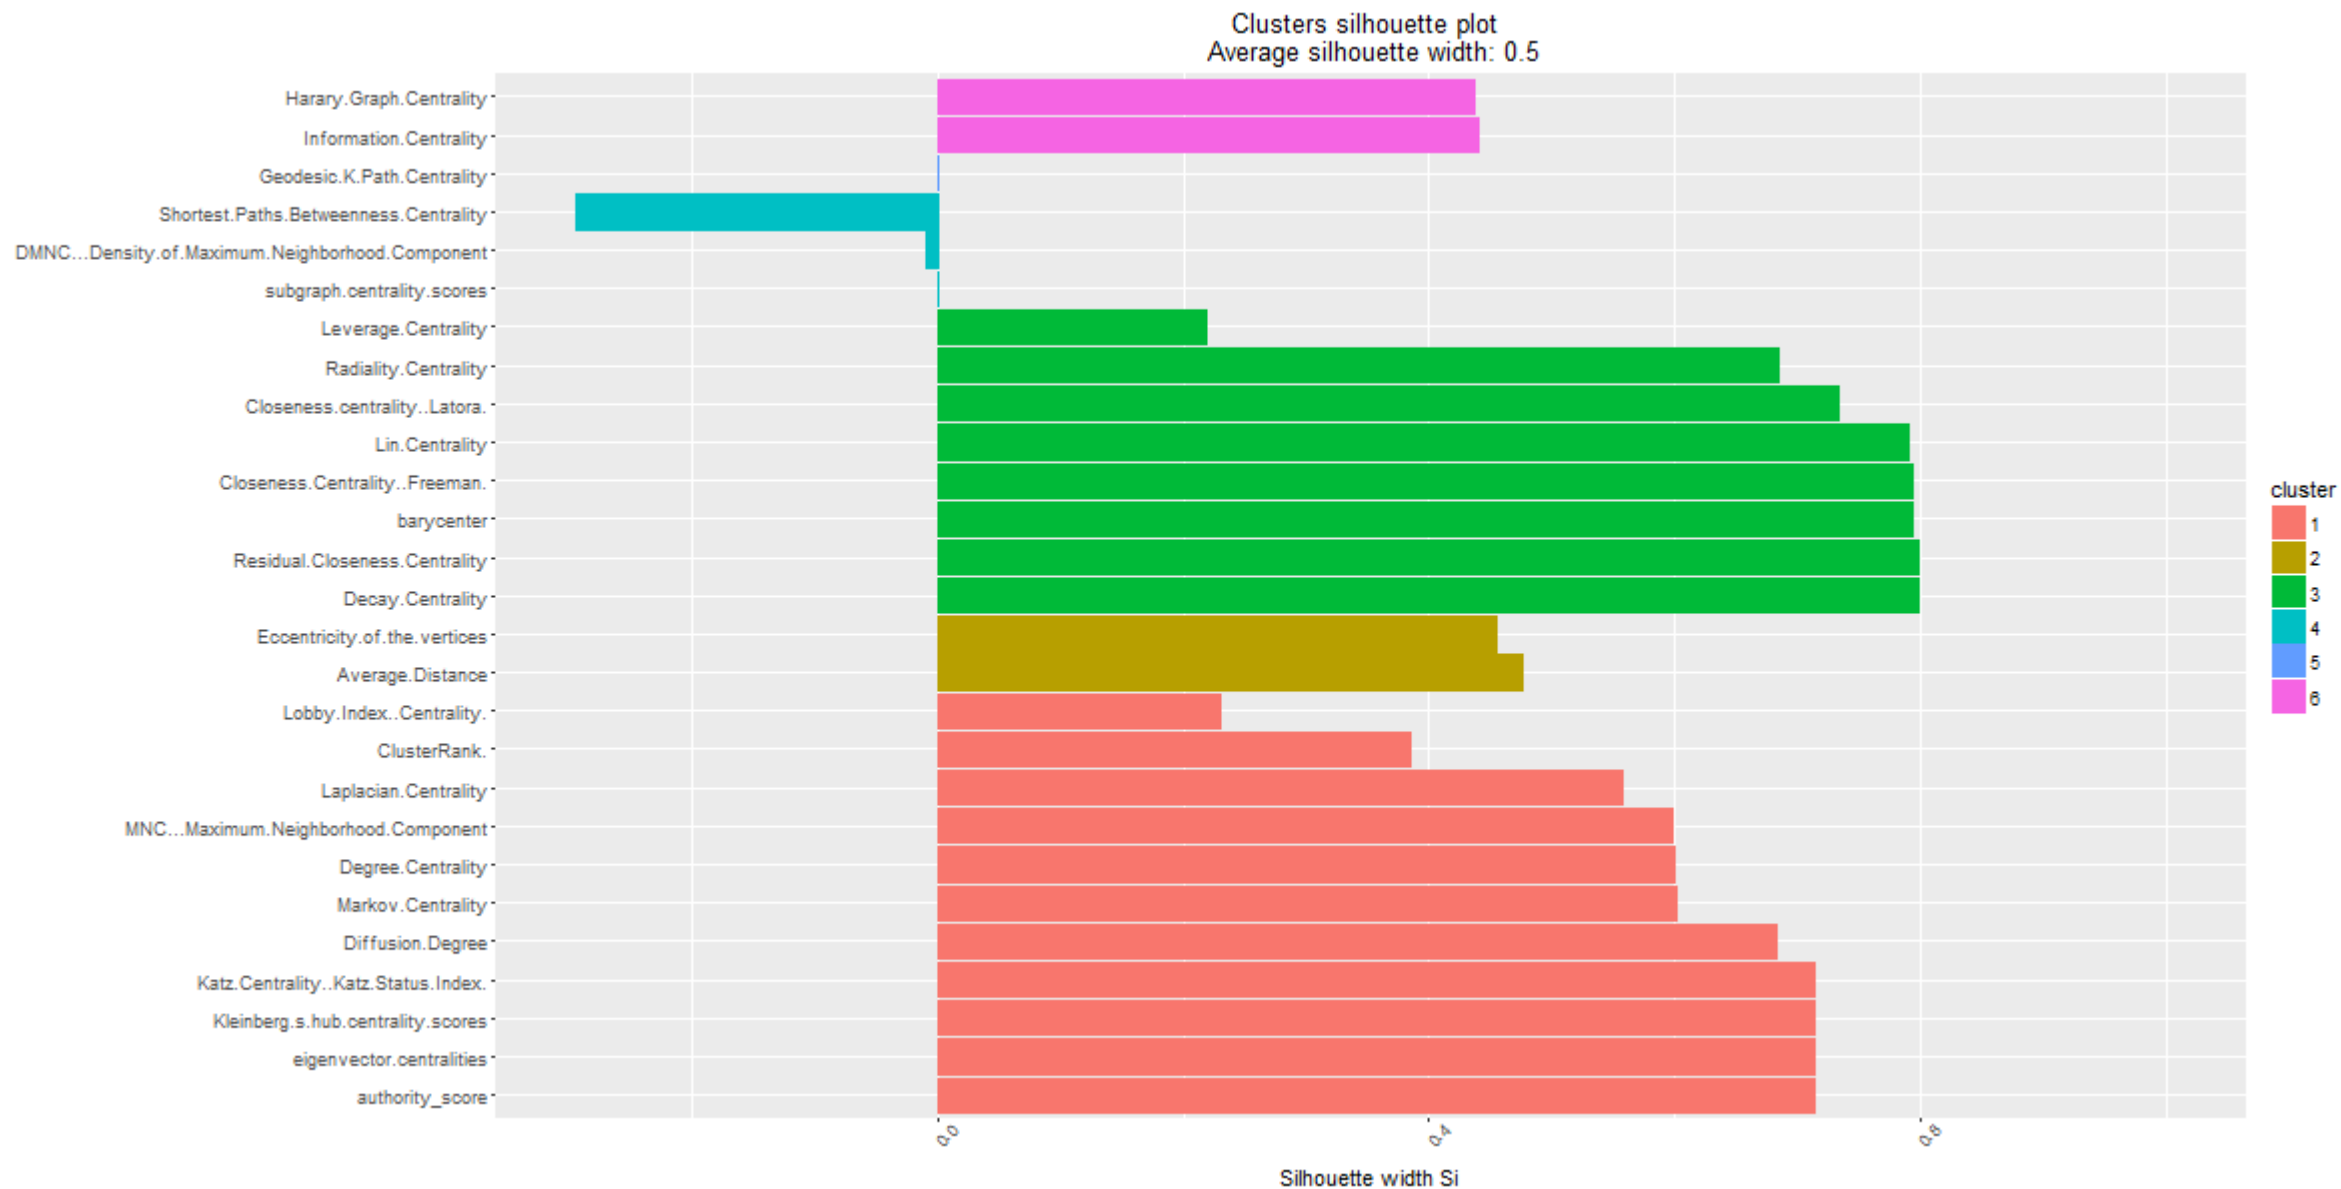

# “Neighborhood\_transferred”

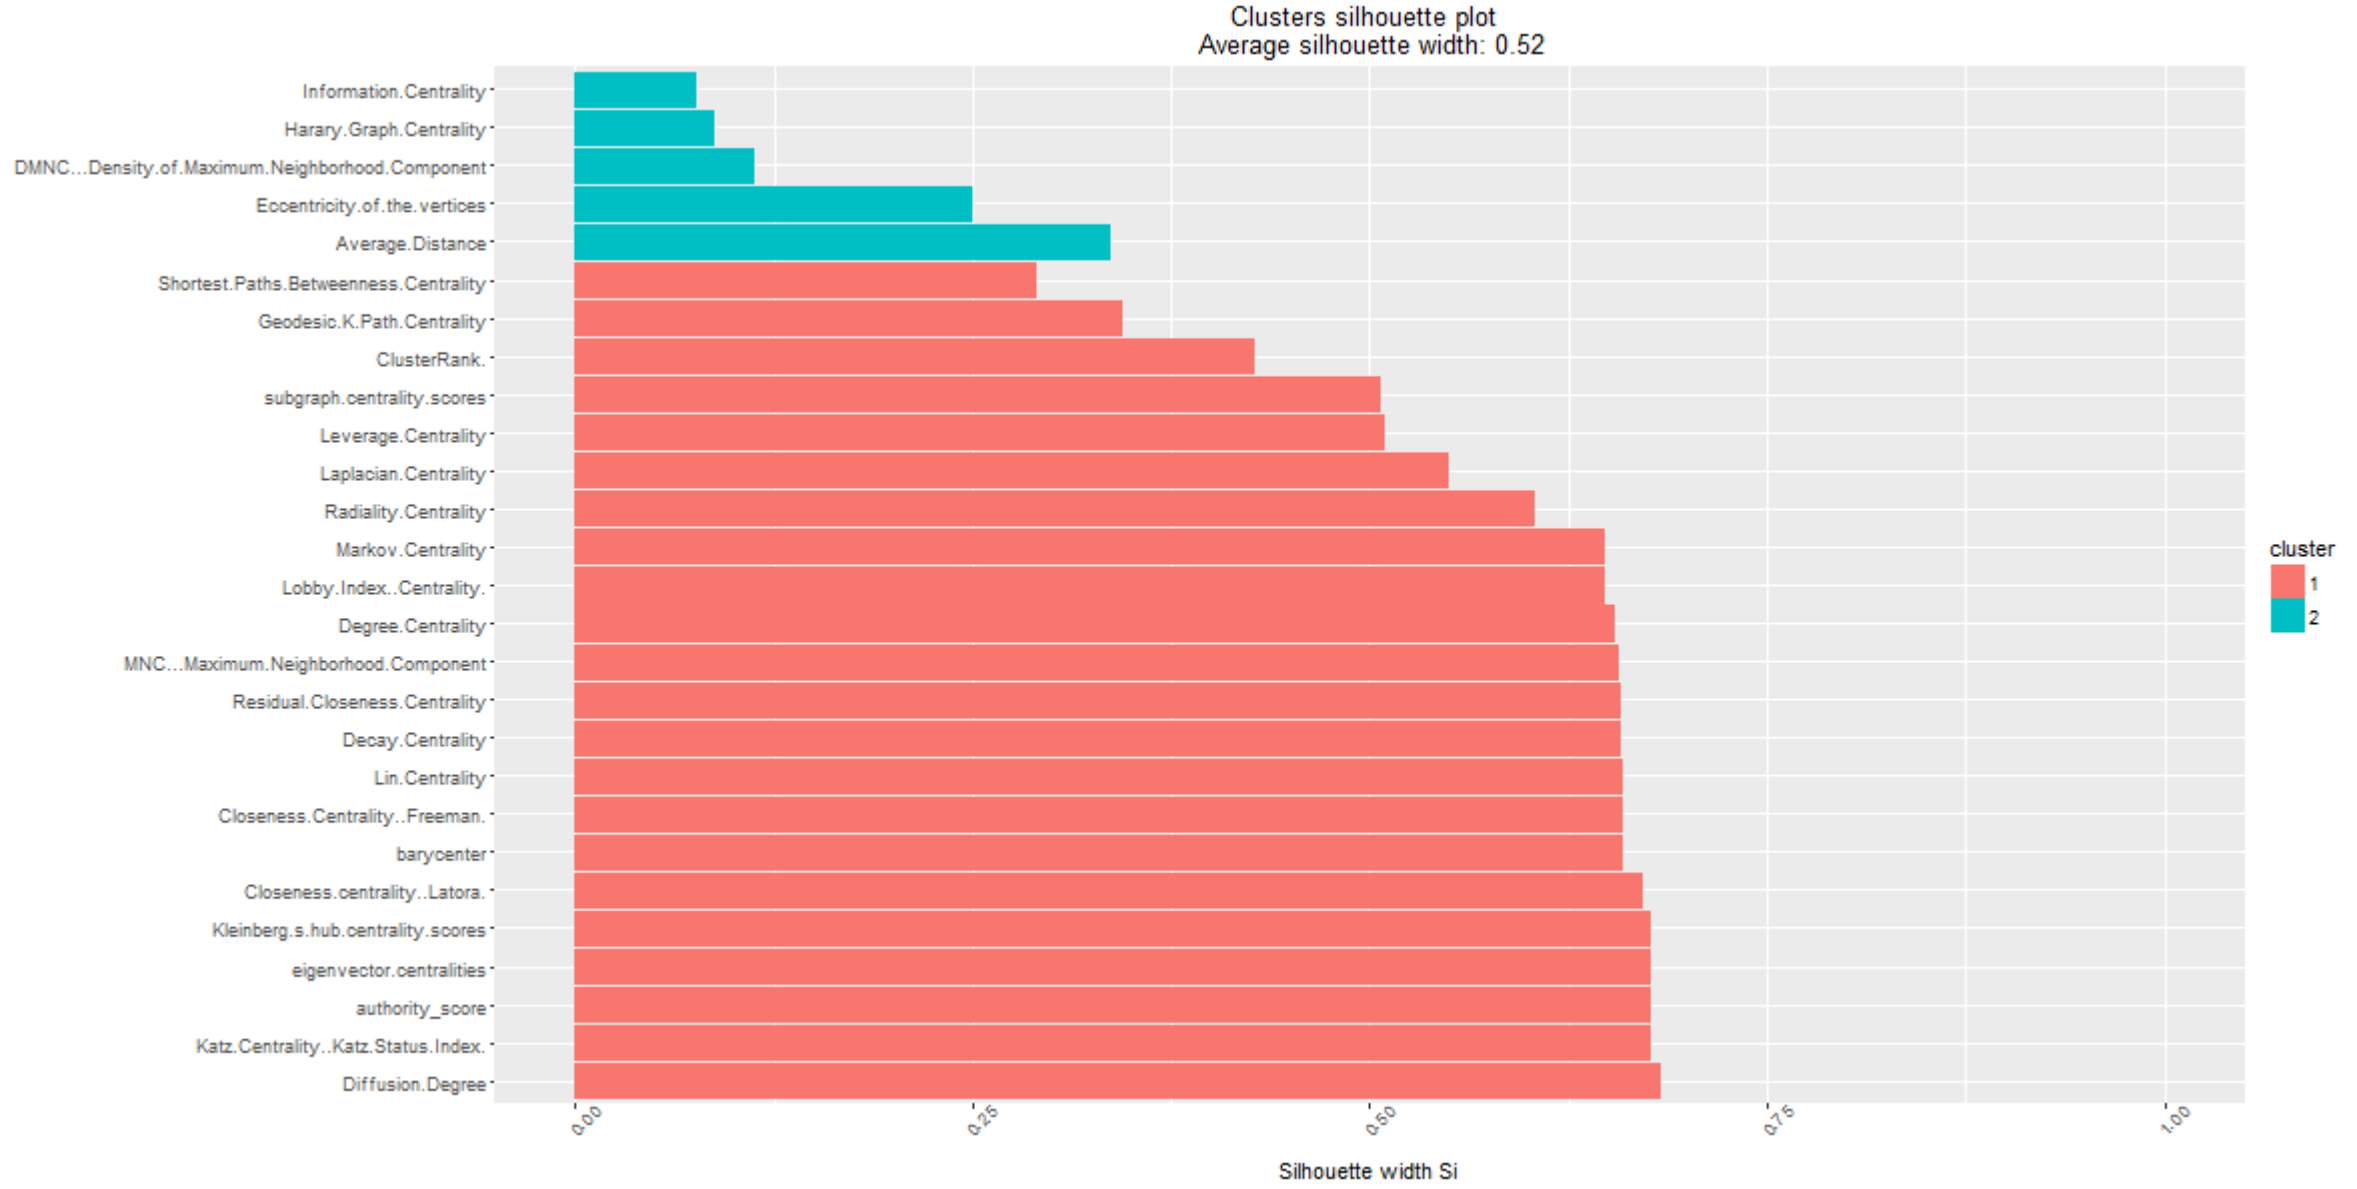

# "Fusion"

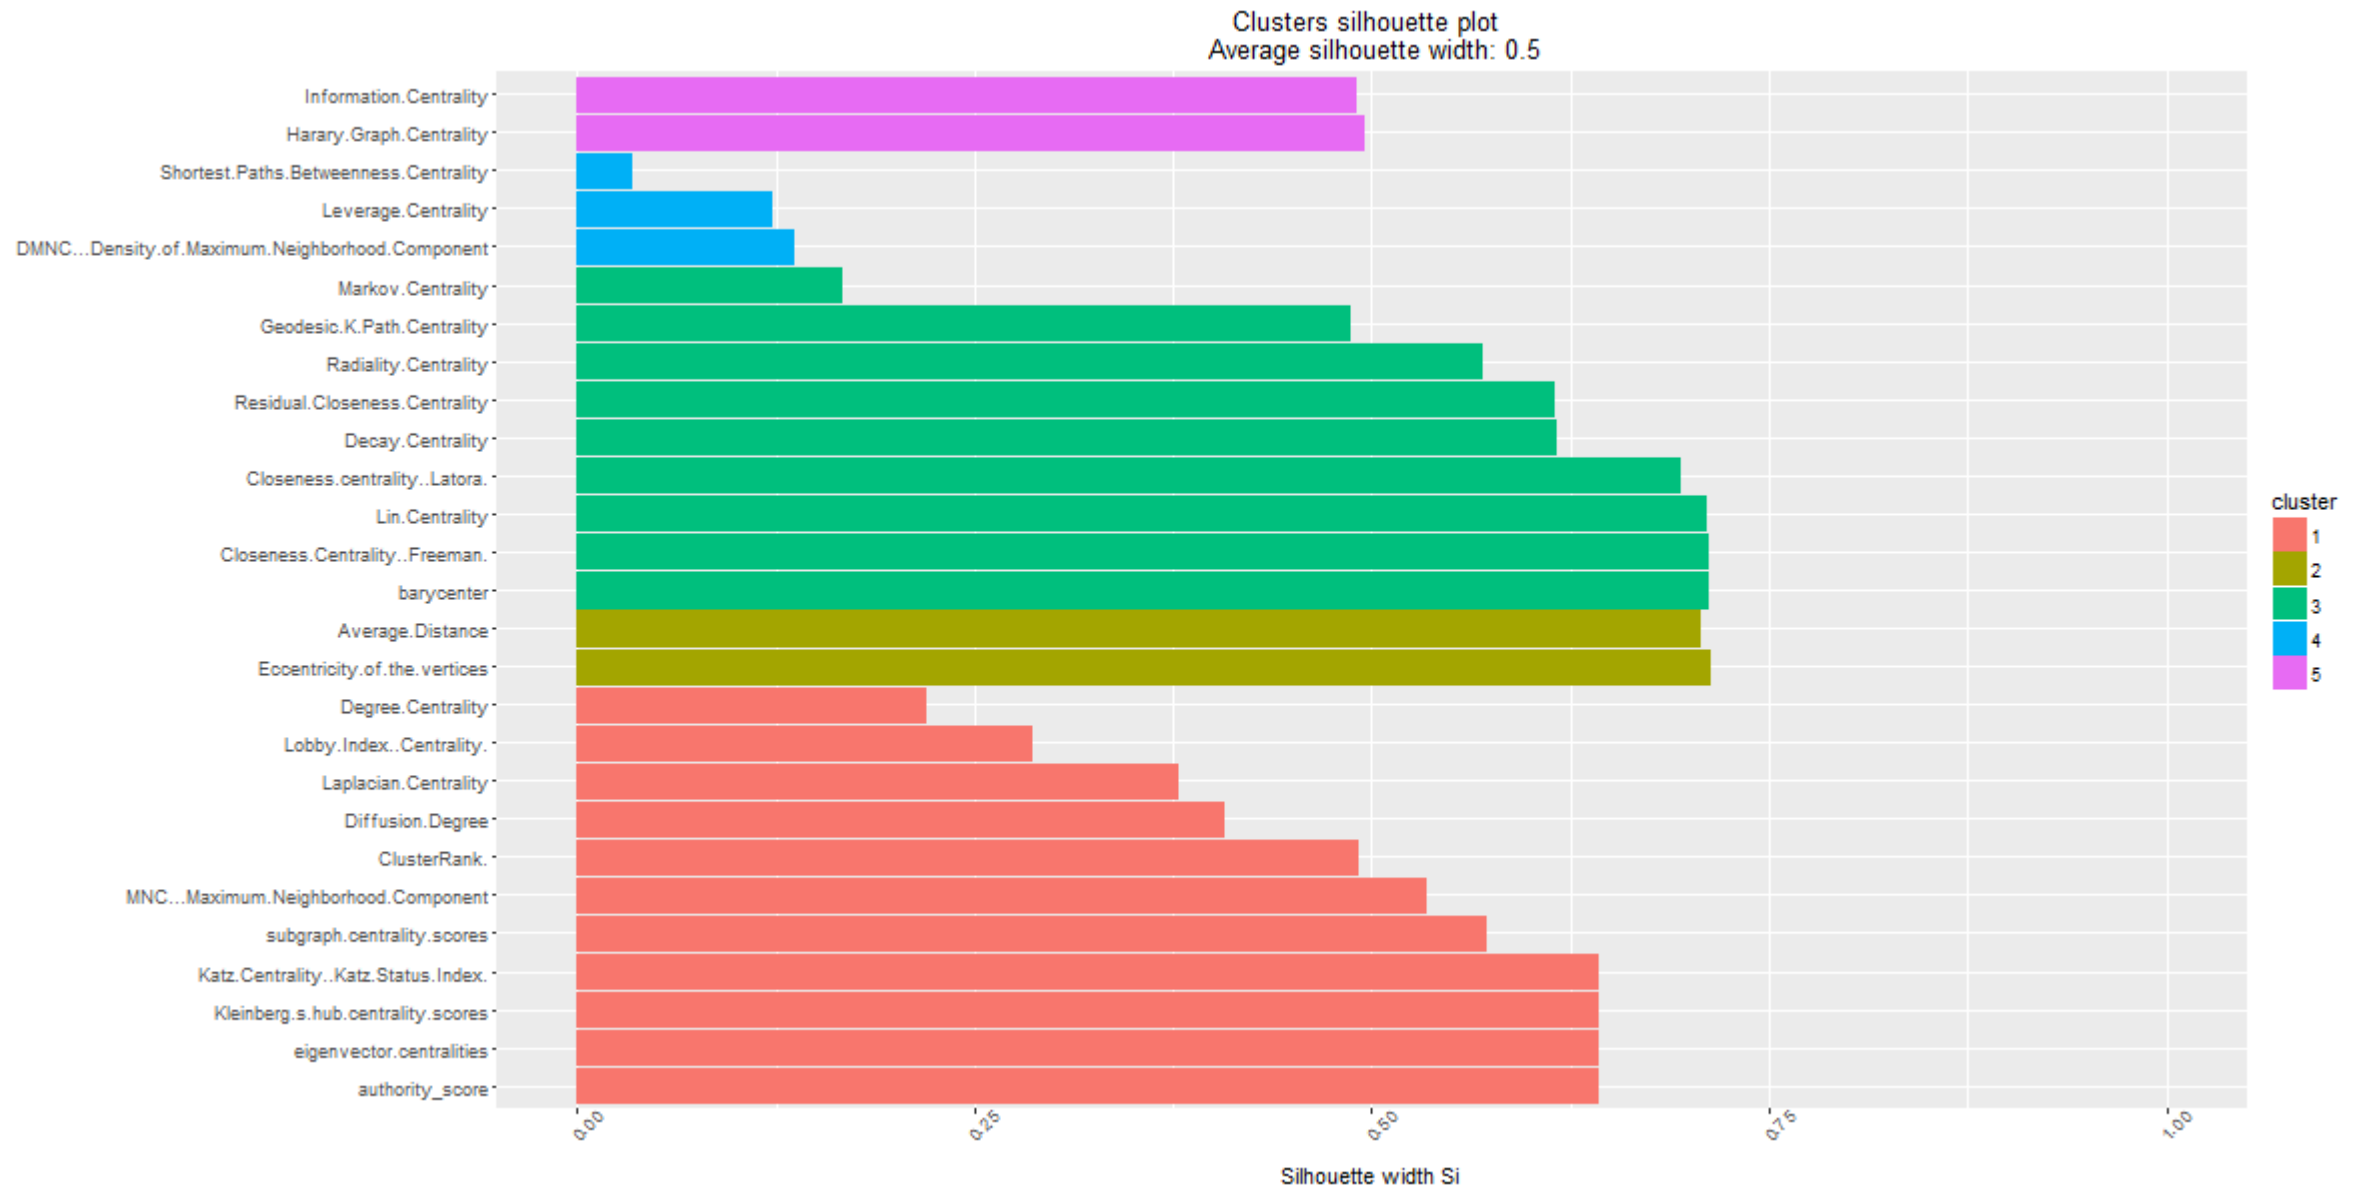

# "Combined\_score"

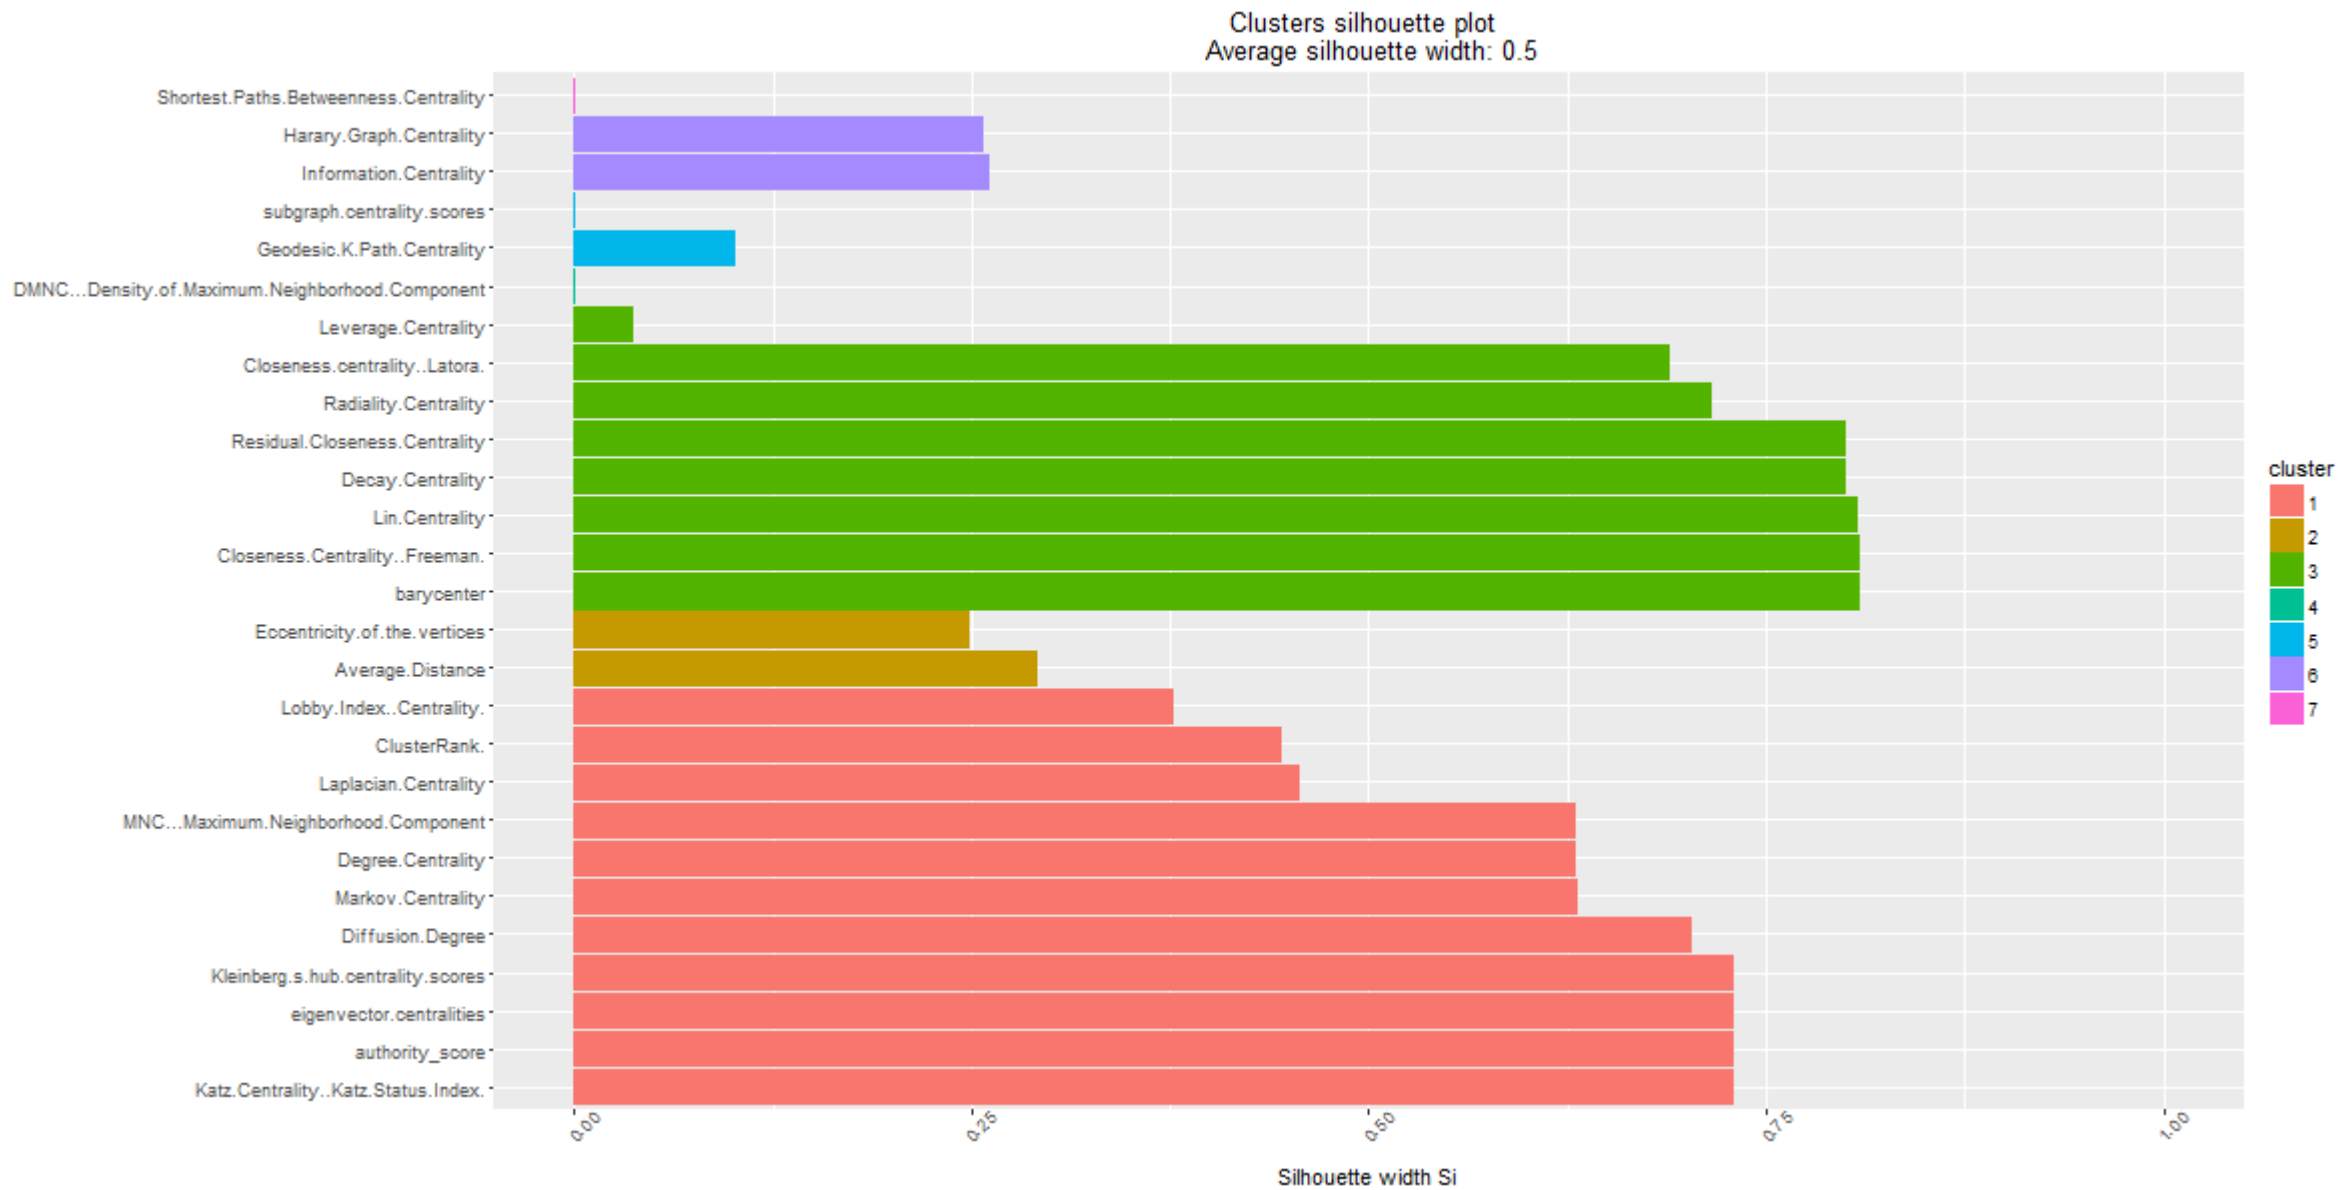

# “Homology”

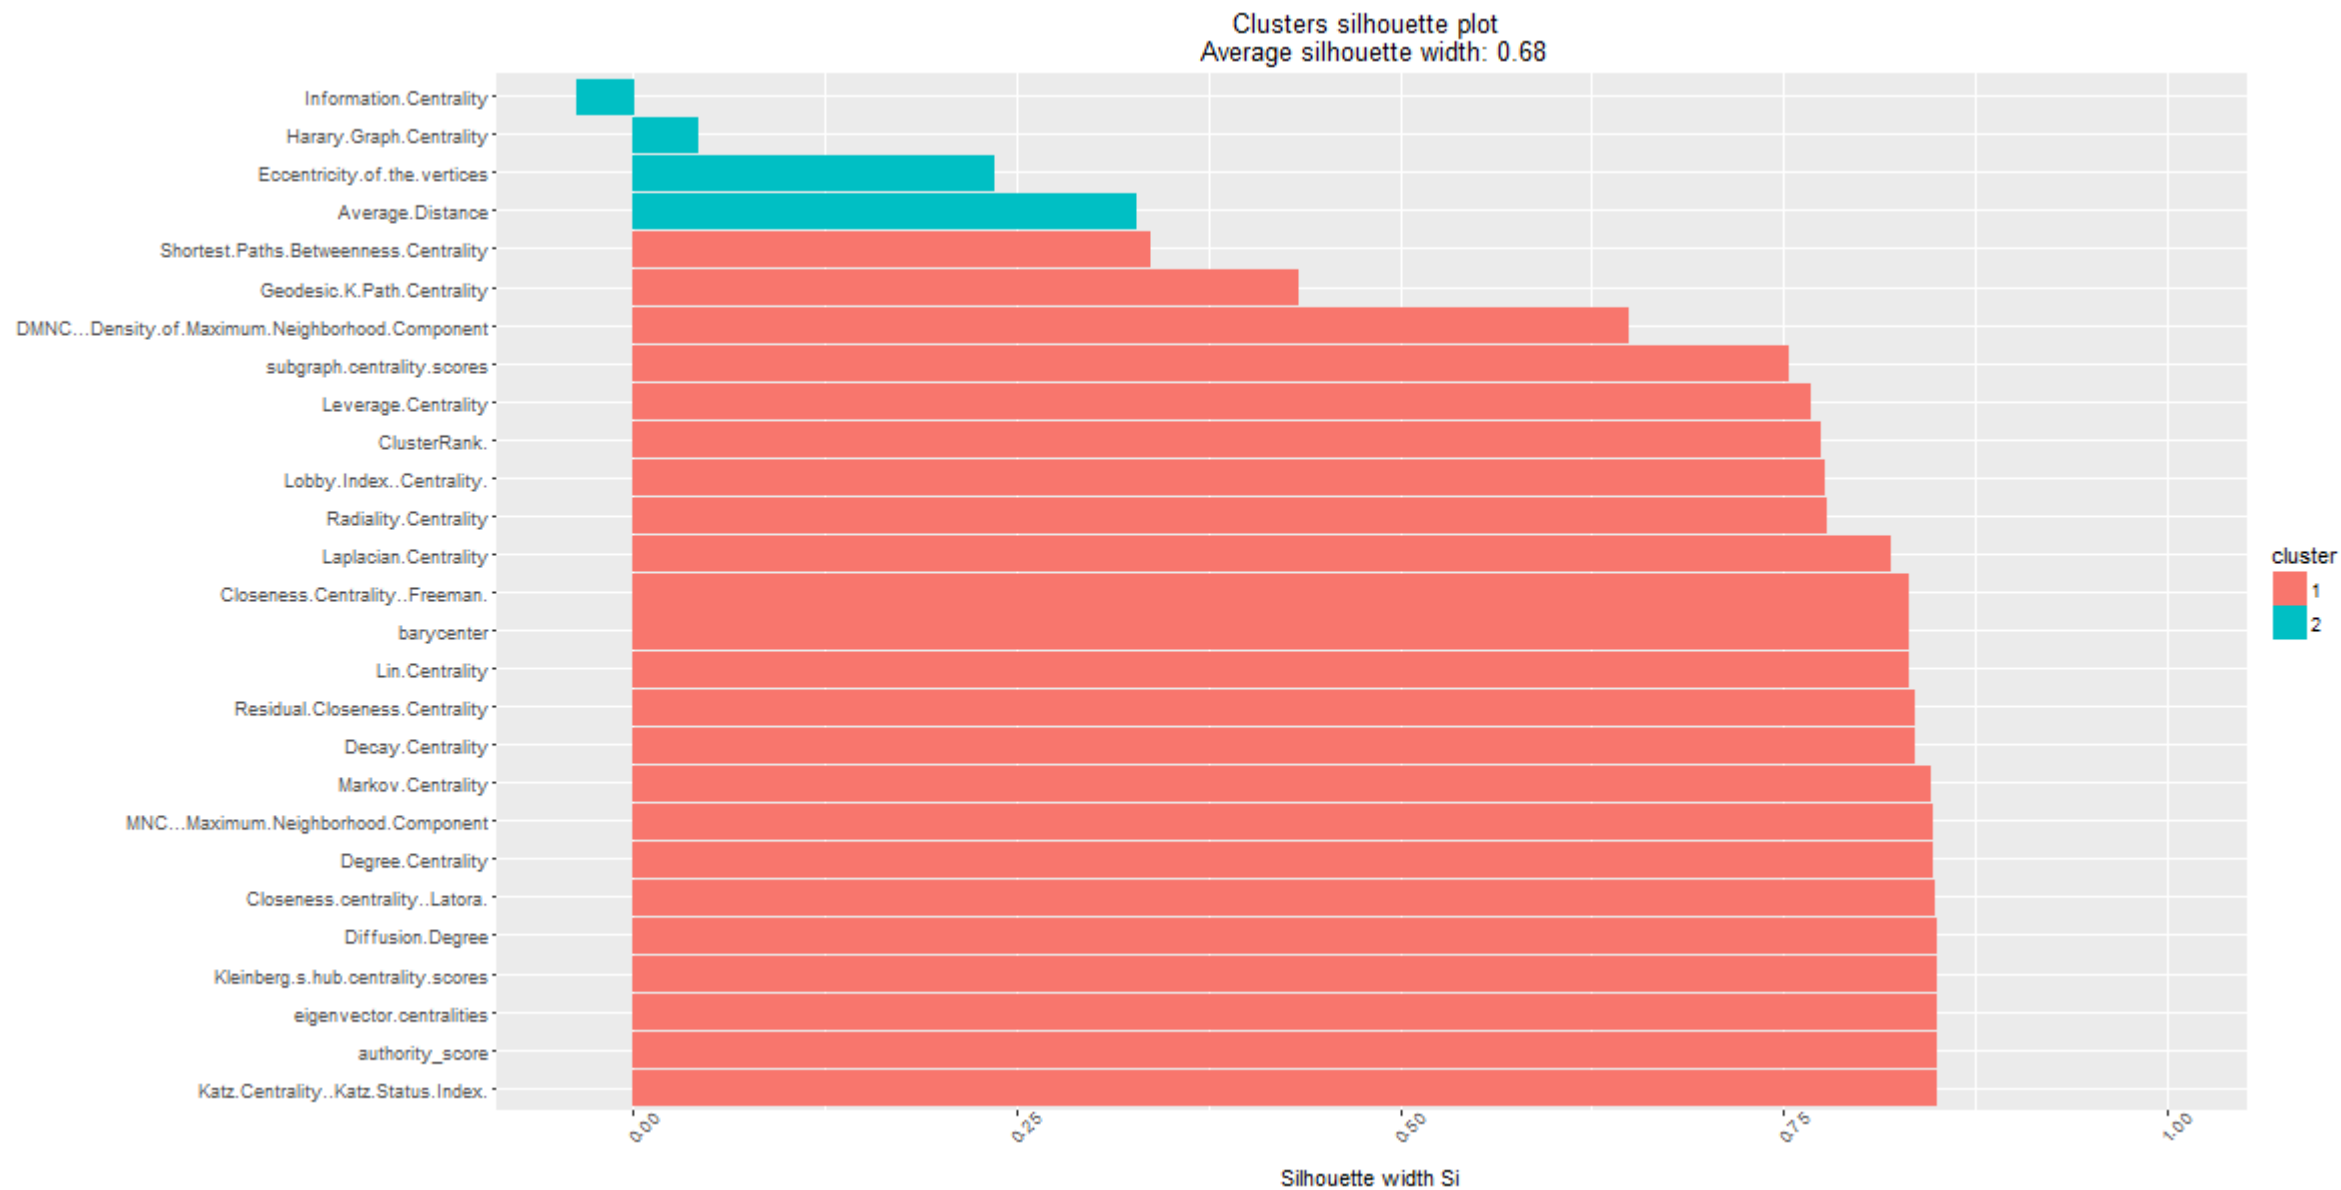

Supplement: 12918_2018_598_MOESM7_ESM.pdf [file 12918_2018_598_MOESM7_ESM.pdf]
